# Supplementary material for: Autologous induced pluripotent stem cell-derived four-organ-chip
Source: Future Sci OA. 2019 Sep 10;5(8):FSO413. doi: 10.2144/fsoa-2019-0065 (PMC6745596; doi:10.2144/fsoa-2019-0065)
Supplement: Supplementary file 1 [file fsoa-05-413-s1.xlsx]

## Sheet: counts
Gene_Id	liver_0	neuro_7	neuro_14	stem_1	stem_2	stem_3	stem_4	stem_5	liver_7	liver_14	intestine_7	intestine_14	intestine_0	renal_14	renal_7	neuro_0	symbol
ENSG00000223972	0	0	0	0	0	0	0	0	0	0	0	0	0	0	0	2	DDX11L1
ENSG00000227232	11	5	1	7	20	16	5	4	1	1	4	17	1	2	6	21	WASH7P
ENSG00000243485	0	0	0	0	0	0	0	0	0	0	0	0	0	0	0	0	MIR1302-10
ENSG00000237613	0	0	0	0	0	0	0	0	0	0	0	0	0	0	0	0	FAM138A
ENSG00000268020	0	0	0	0	0	0	0	0	0	0	0	0	0	0	0	0	OR4G4P
ENSG00000240361	0	0	0	0	0	0	0	0	0	0	0	0	0	0	0	0	OR4G11P
ENSG00000186092	0	0	0	0	0	0	0	0	0	0	0	0	0	0	0	0	OR4F5
ENSG00000238009	0	0	1	0	1	1	0	0	0	0	0	0	0	0	0	0	RP11-34P13.7
ENSG00000239945	0	0	0	0	0	0	0	0	0	0	0	0	0	0	0	0	RP11-34P13.8
ENSG00000233750	0	2	0	0	2	0	0	0	0	0	0	1	0	0	0	1	CICP27
ENSG00000237683	3	4	0	1	8	4	1	2	1	0	0	4	2	1	1	18	AL627309.1
ENSG00000268903	0	0	0	0	0	0	0	0	0	0	0	0	0	1	0	0	RP11-34P13.15
ENSG00000269981	0	0	0	0	0	0	0	0	0	0	0	0	0	0	0	0	RP11-34P13.16
ENSG00000239906	0	0	0	0	0	0	0	0	0	0	0	0	0	0	0	0	RP11-34P13.14
ENSG00000241860	5	4	0	1	7	7	4	5	0	0	0	3	0	1	1	12	RP11-34P13.13
ENSG00000222623	0	0	0	0	0	0	0	0	0	0	0	0	0	0	0	0	RNU6-1100P
ENSG00000241599	1	0	0	1	1	0	0	0	0	0	2	0	0	0	0	2	RP11-34P13.9
ENSG00000228463	0	2	1	0	1	0	1	1	0	0	1	2	0	2	2	6	AP006222.2
ENSG00000241670	0	0	0	0	0	0	0	0	0	0	0	0	0	0	0	0	AP006222.1
ENSG00000237094	0	2	1	0	2	1	0	2	0	0	1	4	0	0	2	2	RP4-669L17.10
ENSG00000250575	0	0	0	0	0	0	0	0	0	0	0	0	0	0	0	0	RP4-669L17.8
ENSG00000233653	0	0	0	0	0	0	0	0	0	0	0	0	0	0	0	0	CICP7
ENSG00000224813	0	0	0	0	0	0	0	0	0	0	0	0	0	0	0	0	RP4-669L17.4
ENSG00000235249	0	0	0	0	0	0	0	0	0	0	0	0	0	0	0	0	OR4F29
ENSG00000269732	0	0	0	0	0	0	0	0	0	0	0	0	0	0	0	0	WBP1LP7
ENSG00000256186	0	0	0	0	0	0	0	0	0	0	0	0	0	0	0	0	AL732372.1
ENSG00000236601	0	0	0	0	0	0	0	0	0	0	0	0	0	0	0	0	RP4-669L17.2
ENSG00000236743	0	0	0	0	0	0	0	0	0	0	0	0	0	0	0	0	RP5-857K21.15
ENSG00000236679	0	0	0	0	0	0	0	0	0	0	0	0	0	0	0	0	RP4-669L17.1
ENSG00000231709	0	0	0	0	1	0	0	0	0	0	0	0	0	0	0	2	RP5-857K21.1
ENSG00000235146	0	0	0	0	0	0	0	0	0	0	0	0	0	0	0	0	RP5-857K21.2
ENSG00000239664	0	0	0	0	0	0	0	0	0	0	0	0	0	0	0	0	RP5-857K21.3
ENSG00000230021	1	0	0	0	0	0	0	0	0	0	0	0	0	0	0	0	RP5-857K21.4
ENSG00000223659	0	0	0	0	0	0	0	0	0	0	0	0	0	0	0	0	RP5-857K21.5
ENSG00000225972	0	2	1	1	0	0	1	0	0	0	0	3	0	0	0	0	MTND1P23
ENSG00000225630	1	0	1	0	0	0	0	0	0	0	0	0	0	0	0	0	MTND2P28
ENSG00000237973	36	22	23	7	11	1751	8	25	1	3	21	74	2	5	7	25	hsa-mir-6723
ENSG00000229344	3	1	0	1	1	1	0	0	0	0	0	2	0	0	0	1	RP5-857K21.7
ENSG00000240409	0	0	0	0	0	0	0	0	0	0	0	0	0	0	0	0	MTATP8P1
ENSG00000248527	1	0	0	2	2	6	0	0	1	1	1	1	0	1	1	0	MTATP6P1
ENSG00000198744	139	46	45	194	302	456	73	217	16	30	111	428	18	38	55	63	RP5-857K21.11
ENSG00000268663	0	0	0	0	0	0	0	0	0	0	0	0	0	0	0	0	WBP1LP6
ENSG00000185097	0	0	0	0	0	0	0	0	0	0	0	0	0	0	0	0	OR4F16
ENSG00000229376	0	0	0	0	1	0	0	1	0	0	0	0	0	1	0	0	CICP3
ENSG00000224956	1	2	0	2	0	0	0	2	0	0	0	0	0	0	1	2	RP11-206L10.1
ENSG00000235373	0	1	0	6	0	8	0	3	0	0	2	8	1	0	1	12	RP11-206L10.3
ENSG00000223181	0	0	0	1	3	0	0	0	0	0	1	0	0	0	0	0	RNU6-1199P
ENSG00000240618	0	0	0	0	0	0	0	0	0	0	0	0	0	0	0	0	RP11-206L10.5
ENSG00000229905	0	0	0	0	0	1	0	0	0	0	0	0	0	0	0	0	RP11-206L10.4
ENSG00000228327	3	9	0	3	8	9	3	3	0	0	0	4	0	0	3	12	RP11-206L10.2
ENSG00000237491	3	12	2	4	13	9	2	7	1	1	10	15	4	3	2	34	RP11-206L10.9
ENSG00000230092	2	4	2	0	3	0	0	2	0	0	2	6	1	1	5	13	RP11-206L10.8
ENSG00000269831	0	0	0	0	0	1	0	0	0	0	0	0	1	0	0	1	AL669831.1
ENSG00000240453	0	0	0	0	0	0	0	0	0	0	0	0	0	0	0	0	RP11-206L10.10
ENSG00000177757	2	0	2	0	1	0	0	0	0	0	2	2	0	0	0	3	FAM87B
ENSG00000225880	5	13	2	6	6	2	1	0	0	0	3	11	1	2	1	21	LINC00115
ENSG00000228794	36	4	7	6	27	23	5	17	2	3	10	17	6	14	8	42	LINC01128
ENSG00000230368	0	0	0	0	0	0	0	0	0	0	0	0	0	0	0	1	FAM41C
ENSG00000234711	0	0	0	0	1	0	0	0	0	0	0	0	0	0	0	0	TUBB8P11
ENSG00000269308	0	0	0	0	0	0	0	0	0	0	0	0	0	0	0	0	AL645608.2
ENSG00000272438	0	0	1	0	1	1	0	1	0	0	0	4	0	0	0	3	RP11-54O7.16
ENSG00000230699	4	0	1	0	10	2	1	1	0	0	5	20	0	2	2	12	RP11-54O7.1
ENSG00000241180	0	0	0	0	1	0	0	0	0	0	0	0	0	0	0	1	RP11-54O7.2
ENSG00000223764	25	2	0	0	11	8	1	1	3	1	62	96	2	7	9	17	RP11-54O7.3
ENSG00000187634	32	5	7	1	7	8	1	2	2	4	51	149	1	4	19	11	SAMD11
ENSG00000268179	0	0	0	0	0	0	0	0	0	0	1	3	0	0	3	1	AL645608.1
ENSG00000188976	265	131	49	424	721	627	151	348	14	16	113	317	33	52	124	340	NOC2L
ENSG00000187961	42	40	0	36	128	93	15	31	2	3	21	56	4	13	18	90	KLHL17
ENSG00000187583	7	2	1	3	6	4	0	2	0	1	0	2	0	0	0	15	PLEKHN1
ENSG00000187642	3	5	0	1	2	0	0	0	0	0	0	1	0	0	0	20	C1orf170
ENSG00000272512	2	42	10	0	3	1	0	1	1	0	0	7	1	6	6	66	RP11-54O7.17
ENSG00000188290	34	101	12	1	4	3	0	1	1	2	10	28	1	29	27	201	HES4
ENSG00000231702	1	0	0	0	0	0	0	0	0	0	1	0	0	0	1	8	RP11-54O7.10
ENSG00000224969	0	1	0	0	1	0	0	0	0	0	0	1	0	0	1	12	RP11-54O7.11
ENSG00000187608	127	50	7	36	51	24	4	44	3	3	18	45	3	1	9	52	ISG15
ENSG00000188157	837	360	61	536	932	737	172	539	28	19	437	1046	154	118	140	1372	AGRN
ENSG00000242590	0	0	0	0	0	0	0	0	0	0	0	0	0	0	0	0	RP11-54O7.14
ENSG00000217801	32	8	2	0	3	3	0	1	1	0	5	9	1	0	2	22	RP11-465B22.3
ENSG00000273443	2	1	0	0	1	0	0	0	0	0	0	0	0	0	0	0	RP11-54O7.18
ENSG00000237330	0	0	0	1	0	0	0	0	0	0	0	1	0	0	0	9	RNF223
ENSG00000131591	26	15	4	15	48	26	4	23	1	2	17	43	3	7	22	62	C1orf159
ENSG00000223823	0	1	1	0	0	0	0	0	0	0	1	3	0	0	0	2	RP11-465B22.5
ENSG00000207730	0	0	0	0	0	0	0	0	0	0	2	0	0	0	0	0	MIR200B
ENSG00000207607	0	0	0	0	0	0	0	0	0	0	3	5	0	0	0	0	MIR200A
ENSG00000198976	0	0	0	0	0	0	0	0	0	0	0	1	0	0	0	0	MIR429
ENSG00000272141	0	1	0	1	1	0	1	2	0	0	2	8	5	0	0	3	RP11-465B22.8
ENSG00000205231	0	3	1	0	1	1	0	1	0	0	0	0	0	0	0	12	TTLL10-AS1
ENSG00000162571	0	2	0	2	0	1	0	2	0	0	0	0	0	0	0	2	TTLL10
ENSG00000186891	12	2	0	4	2	0	0	6	0	0	4	9	0	0	2	1	TNFRSF18
ENSG00000186827	1	2	0	0	0	0	0	1	0	0	0	0	0	0	0	3	TNFRSF4
ENSG00000078808	475	77	20	137	213	180	50	105	45	49	167	488	40	33	49	182	SDF4
ENSG00000176022	68	27	16	57	72	64	19	32	4	3	34	147	9	16	29	83	B3GALT6
ENSG00000184163	5	14	1	1	10	2	0	2	0	0	3	8	1	0	1	25	FAM132A
ENSG00000260179	1	1	1	1	1	1	0	1	0	0	1	2	1	0	1	8	RP5-902P8.12
ENSG00000160087	159	54	19	124	194	143	43	95	7	4	57	131	19	22	43	157	UBE2J2
ENSG00000230415	2	1	0	0	5	3	0	0	0	0	2	9	0	2	0	5	RP5-902P8.10
ENSG00000162572	7	10	6	1	21	19	3	9	0	0	22	63	1	4	9	65	SCNN1D
ENSG00000131584	330	103	33	63	168	127	31	67	19	19	65	270	10	53	75	406	ACAP3
ENSG00000169972	59	32	6	53	79	61	18	38	3	4	17	49	2	6	9	48	PUSL1
ENSG00000127054	279	183	45	224	521	419	102	215	6	13	127	293	31	58	91	526	CPSF3L
ENSG00000240731	8	4	1	5	9	11	1	8	0	1	0	8	1	3	6	20	RP5-890O3.9
ENSG00000224051	74	16	6	27	44	53	7	17	3	5	27	100	1	6	14	48	GLTPD1
ENSG00000169962	15	16	1	3	20	14	4	7	0	0	8	23	5	4	7	27	TAS1R3
ENSG00000107404	214	69	28	147	340	284	68	119	8	18	81	301	25	34	62	287	DVL1
ENSG00000162576	35	107	18	26	34	58	15	27	4	1	30	113	8	29	68	227	MXRA8
ENSG00000175756	140	52	20	149	211	190	69	126	9	12	50	122	8	27	36	110	AURKAIP1
ENSG00000223663	0	1	0	1	0	1	0	0	0	0	0	1	0	0	0	1	RP5-890O3.3
ENSG00000221978	1108	386	77	222	567	475	99	213	56	27	274	881	112	107	154	1275	CCNL2
ENSG00000224870	90	31	3	49	68	88	24	35	4	12	24	83	3	9	19	83	RP4-758J18.2
ENSG00000242485	144	38	17	159	222	174	53	159	7	8	53	131	10	30	34	120	MRPL20
ENSG00000264293	0	0	0	0	0	0	0	0	0	0	0	0	0	0	0	0	RN7SL657P
ENSG00000272455	6	22	4	12	15	21	2	12	1	0	8	18	0	4	4	33	RP4-758J18.13
ENSG00000235098	1	4	2	1	5	3	0	3	0	0	1	7	0	1	0	13	ANKRD65
ENSG00000225905	0	1	0	0	1	1	0	0	0	0	0	0	0	0	0	1	RP4-758J18.7
ENSG00000205116	0	0	0	0	0	0	0	0	0	0	0	0	0	0	0	2	TMEM88B
ENSG00000225285	3	1	0	0	9	6	0	2	0	0	3	5	0	1	2	7	RP4-758J18.10
ENSG00000179403	170	42	2	72	169	101	34	77	2	5	81	151	14	7	7	105	VWA1
ENSG00000215915	7	12	0	1	18	8	1	5	0	0	5	4	0	0	0	15	ATAD3C
ENSG00000160072	173	77	24	168	334	258	61	171	9	7	50	136	7	30	35	239	ATAD3B
ENSG00000197785	94	49	13	113	191	155	43	107	3	11	32	79	4	18	33	112	ATAD3A
ENSG00000205090	1	1	1	2	7	3	1	2	0	0	0	9	0	1	4	13	TMEM240
ENSG00000160075	215	127	37	201	373	358	95	198	10	22	83	216	26	26	73	267	SSU72
ENSG00000215791	0	0	0	0	0	0	0	0	0	0	0	0	0	0	0	0	AL645728.2
ENSG00000215014	0	3	2	0	6	1	1	2	0	0	2	1	0	1	1	3	AL645728.1
ENSG00000236684	0	0	0	0	0	0	0	0	0	0	0	0	0	0	0	0	AL645728.3
ENSG00000228594	6	1	4	28	63	61	16	26	0	1	4	23	1	6	7	7	C1orf233
ENSG00000272106	11	13	1	14	15	13	6	8	1	3	13	28	1	11	15	54	RP11-345P4.9
ENSG00000197530	149	119	17	58	158	128	18	49	7	6	86	234	20	25	54	330	MIB2
ENSG00000189409	0	1	1	0	5	3	0	1	0	0	2	1	0	0	1	3	MMP23B
ENSG00000248333	42	53	6	32	57	59	9	32	2	2	10	34	3	5	13	95	CDK11B
ENSG00000272004	0	0	0	0	2	0	0	0	0	0	0	0	0	0	0	1	RP11-345P4.10
ENSG00000189339	268	99	26	137	223	199	37	116	12	11	117	344	37	58	120	453	SLC35E2B
ENSG00000269737	10	3	0	2	13	8	1	12	0	0	3	15	3	1	5	24	RP11-345P4.7
ENSG00000269227	6	1	2	1	2	5	0	3	0	0	1	8	2	2	2	17	RP11-345P4.6
ENSG00000215914	0	0	0	0	0	1	0	0	0	0	0	0	0	0	0	0	MMP23A
ENSG00000008128	6	14	3	1	13	10	2	1	0	0	5	8	0	0	4	17	CDK11A
ENSG00000268575	14	12	2	6	25	32	2	3	1	1	15	33	5	10	7	34	RP1-283E3.8
ENSG00000227775	7	2	3	4	38	13	4	3	0	0	7	22	3	3	6	32	RP1-283E3.4
ENSG00000215790	5	7	0	2	25	22	6	2	0	0	4	24	4	1	2	25	SLC35E2
ENSG00000008130	293	85	27	117	288	263	38	117	12	28	83	259	15	26	60	230	NADK
ENSG00000078369	1318	578	205	683	1182	1174	288	666	70	114	410	1067	151	232	363	1983	GNB1
ENSG00000231050	2	3	0	0	4	2	0	0	0	0	1	6	2	0	0	5	RP1-140A9.1
ENSG00000169885	2	2	0	3	3	11	0	2	0	0	0	4	0	0	1	3	CALML6
ENSG00000178821	3	2	0	17	30	19	2	10	0	1	5	3	0	1	1	11	TMEM52
ENSG00000142609	0	4	4	0	3	1	0	0	0	0	0	2	0	0	0	19	C1orf222
ENSG00000233542	0	0	0	2	1	3	0	1	0	0	0	0	0	0	0	1	RP11-547D24.1
ENSG00000187730	0	2	0	5	5	2	0	5	0	0	0	0	0	0	0	3	GABRD
ENSG00000226969	0	2	0	1	1	0	0	0	0	0	0	0	0	0	0	0	RP11-547D24.3
ENSG00000067606	61	22	6	60	117	98	27	66	4	5	22	43	9	8	6	93	PRKCZ
ENSG00000271806	1	0	0	0	4	4	1	2	0	0	1	1	0	1	0	7	RP5-892K4.1
ENSG00000182873	5	9	3	11	16	13	6	3	0	2	7	11	1	4	5	33	RP11-181G12.2
ENSG00000162585	57	19	10	41	71	91	14	51	2	2	36	75	3	11	20	80	C1orf86
ENSG00000269554	0	0	0	0	0	0	0	0	0	0	0	0	0	0	0	0	AL590822.2
ENSG00000203301	0	0	0	0	2	2	0	0	0	0	1	5	0	0	0	3	AL590822.1
ENSG00000243558	0	0	0	0	0	0	0	0	0	0	0	0	0	0	0	0	RP11-181G12.5
ENSG00000234396	0	0	1	0	0	0	0	0	0	0	0	0	0	0	0	0	RP11-181G12.4
ENSG00000157933	115	139	36	135	266	285	64	173	8	13	99	254	22	40	53	388	SKI
ENSG00000116151	8	23	4	11	32	35	5	9	1	0	9	47	5	9	12	73	MORN1
ENSG00000272161	0	0	1	0	0	0	0	0	0	0	0	0	0	0	0	0	RP4-713A8.1
ENSG00000269753	0	0	1	0	0	0	0	0	0	0	0	0	0	0	1	2	AL589739.1
ENSG00000269896	2	2	1	2	8	5	0	3	0	0	5	12	1	1	0	11	RP4-740C4.6
ENSG00000238240	0	0	0	0	0	0	0	0	0	0	0	0	0	0	0	0	RP4-740C4.5
ENSG00000272420	0	0	0	1	1	5	0	0	0	0	0	2	0	1	1	8	RP4-740C4.7
ENSG00000271921	0	0	0	0	0	0	0	0	0	0	1	0	0	1	0	3	RP4-740C4.9
ENSG00000271847	2	0	0	0	2	2	0	0	0	0	1	0	0	0	0	4	RP4-740C4.8
ENSG00000178642	0	0	0	0	0	0	0	0	0	0	0	0	0	0	0	0	AL513477.1
ENSG00000157916	431	113	30	171	291	251	65	183	43	44	178	368	38	36	70	266	RER1
ENSG00000157911	44	21	8	58	82	88	17	40	1	5	32	76	7	14	20	65	PEX10
ENSG00000149527	7	27	9	6	12	27	4	6	0	1	3	11	0	7	10	91	PLCH2
ENSG00000224387	0	0	0	0	0	1	0	2	0	0	0	0	0	0	0	3	RP3-395M20.2
ENSG00000229393	0	2	0	0	1	0	0	0	0	0	0	0	0	0	0	1	RP3-395M20.3
ENSG00000157881	98	49	9	58	121	136	26	38	5	7	32	110	16	26	51	168	PANK4
ENSG00000197921	0	83	19	0	1	1	0	0	0	0	0	1	0	78	36	320	HES5
ENSG00000272449	2	8	1	3	3	2	0	1	0	1	0	1	0	2	1	38	RP3-395M20.12
ENSG00000238164	0	2	4	0	4	0	0	0	0	0	0	0	0	0	0	15	RP3-395M20.8
ENSG00000157873	1	5	0	0	2	0	0	0	0	0	0	4	0	0	0	11	TNFRSF14
ENSG00000225931	0	0	0	0	0	0	0	0	0	0	0	0	0	0	0	2	RP3-395M20.7
ENSG00000228037	1	1	0	0	0	1	0	0	0	1	4	6	1	1	2	2	RP3-395M20.9
ENSG00000157870	55	49	13	107	115	115	34	63	4	5	22	86	4	25	37	158	FAM213B
ENSG00000142606	1	3	3	0	2	0	2	4	0	0	1	1	1	0	1	35	MMEL1
ENSG00000237058	0	0	0	0	0	0	1	0	0	0	0	0	0	2	1	4	RP13-436F16.1
ENSG00000215912	2	4	1	4	7	3	0	0	1	1	4	17	5	3	1	13	TTC34
ENSG00000233234	0	0	0	0	0	0	0	0	0	0	0	0	0	0	0	0	RP11-740P5.2
ENSG00000231630	0	1	0	0	0	0	0	0	0	0	0	0	0	0	1	4	RP11-740P5.3
ENSG00000169717	0	0	0	0	0	0	0	0	0	0	0	0	0	0	0	0	ACTRT2
ENSG00000177133	1	14	2	0	0	1	0	0	0	0	36	159	10	5	10	42	LINC00982
ENSG00000256761	0	0	0	0	0	0	0	0	0	0	0	0	0	0	0	0	AL008733.1
ENSG00000142611	8	36	20	0	1	0	0	1	0	1	72	181	17	3	20	152	PRDM16
ENSG00000226286	0	1	2	0	0	0	0	0	0	0	1	1	1	0	0	33	RP1-163G9.2
ENSG00000272235	0	0	2	0	0	0	0	0	0	0	2	3	2	2	3	13	RP11-22L13.1
ENSG00000130762	234	21	10	84	105	137	45	76	2	11	47	141	17	3	13	92	ARHGEF16
ENSG00000272088	1	1	0	0	0	1	0	0	0	0	0	0	0	0	0	1	RP11-168F9.2
ENSG00000162591	46	46	6	56	125	120	14	38	0	2	75	112	21	23	88	261	MEGF6
ENSG00000207776	1	0	0	0	1	0	0	0	0	0	0	1	1	0	0	0	MIR551A
ENSG00000238260	0	3	1	0	0	0	0	0	0	0	0	0	0	0	0	4	RP11-46F15.2
ENSG00000158109	207	57	11	28	87	62	22	45	24	37	45	116	5	10	14	88	TPRG1L
ENSG00000116213	49	53	11	51	103	74	23	28	1	2	23	57	6	14	27	96	WRAP73
ENSG00000078900	3	4	1	5	48	19	3	12	0	1	5	5	1	1	3	15	TP73
ENSG00000227589	0	0	0	0	0	0	0	0	0	0	0	0	0	0	0	0	RP5-1092A11.5
ENSG00000235131	0	1	0	1	1	2	0	0	0	0	0	0	0	0	0	0	RP5-1092A11.2
ENSG00000227372	116	56	13	104	261	257	50	116	4	4	55	183	15	38	37	195	TP73-AS1
ENSG00000162592	1	2	1	0	3	3	0	0	0	0	0	4	0	1	1	4	CCDC27
ENSG00000235169	18	2	0	3	7	7	0	1	7	2	32	52	1	0	4	4	SMIM1
ENSG00000130764	209	91	29	193	409	368	97	194	6	16	80	263	13	36	57	228	LRRC47
ENSG00000266075	1	1	0	0	2	0	0	1	0	0	0	4	0	0	0	1	RN7SL574P
ENSG00000272153	3	2	0	7	7	6	2	3	1	1	0	4	1	1	1	8	RP1-286D6.5
ENSG00000116198	102	59	22	66	134	128	35	52	6	12	44	96	15	16	27	156	CEP104
ENSG00000169598	19	5	3	21	39	50	9	21	0	1	15	26	1	4	5	19	DFFB
ENSG00000264428	0	0	0	0	0	0	0	0	0	0	0	0	0	0	0	0	AL691523.1
ENSG00000198912	71	88	16	83	136	86	14	59	10	6	49	79	14	21	45	126	C1orf174
ENSG00000236423	5	3	2	4	1	1	1	3	1	1	1	2	0	0	0	1	LINC01134
ENSG00000233304	0	0	0	0	0	0	0	0	0	0	0	1	0	0	0	1	RP13-614K11.1
ENSG00000226374	0	0	0	0	0	0	0	0	0	0	0	0	0	0	0	0	RP13-614K11.2
ENSG00000229280	0	0	0	0	0	0	0	0	0	0	0	0	0	0	0	0	RP11-374C13.1
ENSG00000235054	0	0	0	0	0	0	0	0	0	0	0	0	0	0	0	1	RP5-1166F10.1
ENSG00000227169	0	0	0	0	0	0	0	0	0	0	0	0	0	0	0	0	RP1-37J18.1
ENSG00000232596	0	0	0	0	0	0	0	0	0	0	0	0	0	0	0	0	RP1-37J18.2
ENSG00000196581	1	26	5	24	26	31	8	48	1	0	1	2	0	34	30	136	AJAP1
ENSG00000231510	0	0	0	0	0	0	0	0	0	0	0	0	0	0	0	0	RP11-542C10.1
ENSG00000260972	0	0	0	0	0	0	0	0	0	0	0	0	0	0	0	1	RP1-58B11.1
ENSG00000264341	0	0	0	0	0	0	0	0	0	0	0	0	0	0	0	0	MIR4417
ENSG00000236948	0	0	0	0	0	0	0	0	0	0	0	0	0	0	0	0	RP11-154H17.1
ENSG00000216045	0	0	0	0	0	0	0	0	0	0	0	0	0	0	0	0	AL356693.1
ENSG00000264101	0	0	0	0	0	0	0	0	0	0	0	0	0	0	2	1	MIR4689
ENSG00000131697	35	77	19	34	69	73	8	37	0	1	18	68	5	11	36	243	NPHP4
ENSG00000266687	0	0	0	0	0	0	0	0	0	0	0	0	0	0	0	0	AL356261.1
ENSG00000069424	8	10	2	28	26	20	4	15	1	0	18	59	2	7	16	48	KCNAB2
ENSG00000268332	0	0	0	0	0	0	0	0	0	0	0	0	0	0	0	0	AL035406.1
ENSG00000116254	4	18	1	15	30	31	0	13	0	1	4	7	0	0	1	26	CHD5
ENSG00000116251	552	771	217	615	1104	1292	318	699	44	56	471	1136	134	248	507	2089	RPL22
ENSG00000226944	1	11	0	1	1	0	0	0	0	0	1	0	0	0	1	8	RP1-120G22.11
ENSG00000158286	78	12	5	5	42	46	7	15	6	1	15	51	4	2	7	32	RNF207
ENSG00000116237	407	104	44	641	893	1170	296	579	25	38	101	356	18	65	98	345	ICMT
ENSG00000225077	5	0	0	10	19	29	4	12	0	0	1	1	0	0	0	6	LINC00337
ENSG00000173673	0	1	1	10	24	29	9	16	0	0	0	0	0	0	0	13	HES3
ENSG00000158292	33	35	12	22	59	50	15	28	2	1	80	249	5	22	57	143	GPR153
ENSG00000097021	31	54	13	154	166	164	53	119	4	3	39	92	12	16	22	138	ACOT7
ENSG00000271746	0	0	0	0	0	0	0	0	0	0	0	0	0	0	0	0	RP1-202O8.3
ENSG00000069812	9	1	0	3	1	8	1	1	1	1	5	5	1	0	2	7	HES2
ENSG00000187017	16	4	0	6	24	29	2	9	3	7	42	146	21	1	6	17	ESPN
ENSG00000265392	0	0	0	0	0	0	0	0	0	0	0	0	0	0	0	0	MIR4252
ENSG00000231868	0	0	0	0	1	2	0	0	0	0	0	1	0	0	1	3	RP1-202O8.2
ENSG00000215788	12	12	5	17	61	39	6	16	1	0	21	62	7	9	16	148	TNFRSF25
ENSG00000171680	82	100	20	48	165	177	27	58	2	2	114	299	27	41	77	496	PLEKHG5
ENSG00000162408	203	114	37	318	475	584	128	303	8	7	66	213	19	55	52	430	NOL9
ENSG00000253022	0	1	0	0	0	1	0	1	0	0	0	0	0	0	0	1	RNU6-731P
ENSG00000229519	0	1	2	5	5	5	1	3	1	0	1	2	0	1	1	5	RP11-58A11.2
ENSG00000173662	0	4	3	0	1	1	0	2	0	0	0	3	0	0	0	9	TAS1R1
ENSG00000204859	77	41	8	36	126	88	20	43	4	5	28	72	11	11	21	86	ZBTB48
ENSG00000162413	284	146	15	187	311	252	59	195	14	15	55	106	14	16	23	180	KLHL21
ENSG00000116273	113	102	31	158	297	270	65	192	3	5	52	170	18	27	51	207	PHF13
ENSG00000041988	36	61	16	23	64	38	14	15	3	1	32	65	6	9	32	98	THAP3
ENSG00000007923	139	36	26	175	266	333	77	163	8	13	33	145	11	31	41	161	DNAJC11
ENSG00000228750	0	0	0	0	0	0	0	0	0	0	0	0	0	0	0	0	RP11-242F24.1
ENSG00000239166	0	0	0	0	0	0	0	0	0	0	0	0	0	0	0	0	snoU13
ENSG00000237436	1	7	2	3	5	4	1	2	0	0	1	1	0	1	1	7	RP11-312B8.1
ENSG00000171735	160	145	37	88	126	179	53	94	8	20	50	91	13	42	61	591	CAMTA1
ENSG00000227950	0	2	1	0	2	3	0	1	0	0	1	1	0	0	0	6	RP11-312B8.2
ENSG00000237365	0	0	0	0	0	0	0	0	0	0	0	0	0	0	0	1	RP11-334N17.1
ENSG00000207056	0	0	0	0	1	0	0	0	0	0	0	1	0	0	0	0	RNU1-8P
ENSG00000237402	0	1	0	0	1	2	1	0	0	0	0	0	0	0	0	1	CAMTA1-IT1
ENSG00000237728	0	0	0	0	1	0	0	0	0	0	0	0	0	0	0	3	RP3-453P22.2
ENSG00000225126	0	0	0	0	0	0	0	0	0	0	0	0	0	0	0	4	RP4-549F15.1
ENSG00000270171	1	1	1	0	5	3	0	0	0	0	0	0	0	2	1	15	RP11-338N10.1
ENSG00000270035	0	0	0	0	0	0	0	0	0	0	0	0	0	1	0	5	RP11-338N10.2
ENSG00000269978	0	1	2	1	2	4	0	2	1	0	1	0	0	0	0	6	RP11-338N10.3
ENSG00000049245	594	128	40	115	267	324	69	130	50	62	236	538	60	41	84	281	VAMP3
ENSG00000269925	3	1	0	1	2	6	0	1	0	1	3	4	2	0	0	5	RP3-467L1.6
ENSG00000049246	6	56	14	37	71	104	9	40	1	1	12	49	5	13	23	186	PER3
ENSG00000236266	0	0	0	0	0	1	0	0	0	0	0	1	0	0	0	7	RP3-467L1.4
ENSG00000049247	0	0	0	0	0	0	0	0	0	0	0	0	0	0	1	0	UTS2
ENSG00000049249	69	0	0	0	0	0	0	0	0	0	1	5	4	0	0	1	TNFRSF9
ENSG00000270330	0	0	0	0	0	0	0	0	0	0	0	0	0	0	0	0	RP5-892F13.2
ENSG00000116288	300	145	41	320	450	441	128	294	23	22	150	323	30	57	113	351	PARK7
ENSG00000200344	1	0	1	1	0	2	0	0	0	0	0	0	0	0	0	1	Y_RNA
ENSG00000116285	6036	74	30	268	366	419	85	201	104	80	190	265	138	27	58	425	ERRFI1
ENSG00000238290	12	1	0	0	1	0	0	0	0	0	0	0	0	0	1	5	RP11-431K24.1
ENSG00000232848	1	0	0	0	0	0	0	1	0	0	0	0	0	0	0	0	CTA-215D11.4
ENSG00000229305	0	0	0	0	0	0	0	0	0	0	0	0	0	0	0	1	RP11-431K24.2
ENSG00000200975	0	0	0	0	0	0	0	0	0	0	0	0	0	0	0	0	RNU1-7P
ENSG00000227634	2	0	0	0	0	0	0	0	0	0	0	1	0	1	0	0	RP11-431K24.3
ENSG00000233645	0	0	0	0	0	0	0	0	0	0	0	0	0	0	0	0	RP11-431K24.4
ENSG00000265414	0	0	0	0	0	0	0	0	0	0	0	0	0	0	0	0	RN7SL729P
ENSG00000251977	0	0	0	0	0	0	0	0	0	0	0	0	0	0	0	0	RNU6-991P
ENSG00000162426	2	2	2	8	15	12	2	3	0	0	0	5	0	1	2	15	SLC45A1
ENSG00000252254	0	0	0	0	1	0	0	0	0	0	0	0	0	0	0	1	Y_RNA
ENSG00000142599	239	430	107	158	364	354	67	205	16	12	185	427	81	132	179	1184	RERE
ENSG00000232912	1	0	0	0	2	5	1	0	0	0	2	2	0	1	0	8	RP5-1115A15.1
ENSG00000221083	0	1	0	0	0	0	0	0	0	0	0	0	0	0	0	3	SNORA77
ENSG00000270282	0	2	0	0	1	1	0	0	0	0	0	1	0	0	0	4	RP5-1115A15.2
ENSG00000234619	0	1	0	0	2	3	0	2	0	0	1	0	0	4	3	8	RPL7P11
ENSG00000224315	1	3	0	1	7	5	1	1	0	0	1	1	0	3	0	11	RPL7P7
ENSG00000222511	3	2	0	0	0	2	0	0	0	0	0	0	0	0	0	3	Y_RNA
ENSG00000226545	0	3	1	0	3	2	0	1	0	0	0	0	1	1	0	11	RP4-633I8.3
ENSG00000228423	2	2	0	0	5	4	0	1	0	0	4	0	1	1	0	7	RP4-633I8.4
ENSG00000229716	0	0	0	0	0	0	0	0	0	0	0	0	0	0	0	0	RP11-185B14.1
ENSG00000074800	5516	1455	528	5208	6936	6721	1950	4393	263	279	1244	3758	1140	1139	2751	5675	ENO1
ENSG00000236269	16	15	1	9	14	17	1	12	0	0	3	5	4	1	4	62	ENO1-IT1
ENSG00000230679	0	0	0	0	1	2	0	0	0	0	0	0	0	0	1	3	ENO1-AS1
ENSG00000201725	0	0	0	0	0	0	0	0	0	0	0	0	0	0	0	0	RNU6-304P
ENSG00000238249	0	0	0	0	0	0	0	0	0	0	0	1	0	0	0	2	HMGN2P17
ENSG00000232208	0	0	0	0	0	0	0	0	0	0	0	0	0	0	0	0	RP3-477M7.5
ENSG00000232663	0	0	0	0	0	0	0	0	0	0	0	0	0	0	0	0	RP3-477M7.6
ENSG00000131686	1	3	0	0	0	0	0	1	0	0	0	0	0	0	0	5	CA6
ENSG00000265141	0	0	0	0	0	0	0	1	0	0	0	0	0	0	0	2	RN7SL451P
ENSG00000197241	8	0	0	1	0	0	0	0	3	1	0	0	0	0	0	0	SLC2A7
ENSG00000142583	62	0	0	0	2	0	1	0	2	0	7	12	0	0	0	2	SLC2A5
ENSG00000252404	0	0	0	0	0	0	0	0	0	0	0	0	0	0	0	0	SCARNA16
ENSG00000180758	632	15	4	3	25	30	0	11	52	30	30	39	7	6	9	30	GPR157
ENSG00000207865	1	0	0	0	0	0	0	1	0	0	1	0	0	0	0	0	MIR34A
ENSG00000228526	3	5	0	0	1	3	0	0	0	0	1	1	0	0	0	2	RP3-510D11.1
ENSG00000234546	1	0	2	0	1	2	0	0	0	1	0	3	5	3	1	5	RP3-510D11.2
ENSG00000049239	905	47	16	22	114	127	15	31	44	46	353	851	60	43	106	300	H6PD
ENSG00000252841	0	0	0	0	0	0	0	0	0	0	0	0	0	0	0	0	Z98044.1
ENSG00000171621	758	23	7	10	9	40	2	3	62	45	14	46	10	5	11	33	SPSB1
ENSG00000252956	0	0	0	0	0	0	0	0	0	0	0	0	0	0	0	0	RNA5SP40
ENSG00000235263	0	0	0	0	0	0	0	0	0	0	0	0	0	0	0	0	RP13-392I16.1
ENSG00000171612	118	34	14	81	132	116	24	85	37	32	29	45	12	7	16	202	SLC25A33
ENSG00000231181	6	1	0	1	5	2	1	6	0	0	0	1	0	0	0	12	RP13-15M17.1
ENSG00000188807	24	28	15	86	143	125	29	99	0	2	18	63	4	11	26	101	TMEM201
ENSG00000171608	85	15	6	53	184	228	34	86	1	1	31	52	8	7	12	45	PIK3CD
ENSG00000179840	0	1	0	0	0	1	0	1	0	0	0	0	0	0	0	0	C1orf200
ENSG00000233268	0	0	0	0	0	0	0	0	0	0	0	0	0	0	0	0	RP11-558F24.2
ENSG00000231789	7	7	2	8	16	38	4	8	0	0	15	21	0	3	3	9	RP11-558F24.4
ENSG00000171603	223	294	63	252	522	541	110	310	15	4	226	516	58	81	161	918	CLSTN1
ENSG00000271264	0	0	2	1	0	0	0	0	0	0	0	0	0	0	0	1	RP11-558F24.6
ENSG00000178585	100	32	16	94	136	178	32	93	6	5	70	166	14	29	42	175	CTNNBIP1
ENSG00000223989	0	0	0	0	0	0	0	0	0	0	0	0	0	0	0	0	RP11-84A14.5
ENSG00000162441	134	68	34	48	119	139	36	69	13	23	65	198	13	58	87	251	LZIC
ENSG00000228150	1	1	1	0	3	4	0	0	0	0	0	3	0	0	2	3	RP11-84A14.4
ENSG00000173614	61	16	5	11	29	30	5	6	8	8	24	65	2	8	14	73	NMNAT1
ENSG00000202415	2	0	0	0	0	4	0	1	0	0	0	0	1	0	1	2	RN7SKP269
ENSG00000265521	0	0	0	0	0	0	1	0	0	0	0	0	0	0	0	0	MIR5697
ENSG00000241326	0	0	0	0	0	0	0	0	0	0	0	0	0	0	0	0	RP11-807G9.2
ENSG00000162444	0	0	0	6	14	16	3	12	0	0	1	0	0	0	0	0	RBP7
ENSG00000225786	0	1	0	0	0	0	0	0	0	0	0	0	0	0	0	2	AL590639.1
ENSG00000130939	279	178	67	356	517	786	167	358	28	26	150	354	33	63	122	651	UBE4B
ENSG00000224340	1	0	0	0	0	2	0	0	1	0	0	2	0	0	0	1	RP11-496H15.2
ENSG00000233623	0	0	0	0	0	0	1	1	1	0	1	0	0	0	0	2	PGAM1P11
ENSG00000201746	0	0	0	0	0	0	0	0	0	0	0	0	0	0	0	0	RNU6-828P
ENSG00000054523	729	976	335	485	1185	1438	222	688	34	48	241	508	64	402	474	4260	KIF1B
ENSG00000264881	0	2	0	0	0	0	0	0	0	0	0	0	0	0	0	0	MIR1273D
ENSG00000199562	0	1	1	1	0	2	0	0	0	0	0	0	0	0	1	7	RNU6-37P
ENSG00000264501	0	0	0	0	0	0	0	0	0	0	0	0	0	0	0	0	RN7SL731P
ENSG00000265945	0	2	0	0	0	2	0	0	0	0	0	1	0	1	1	8	RN7SL721P
ENSG00000142657	667	325	127	724	898	1045	280	591	111	125	234	556	41	136	259	879	PGD
ENSG00000271989	0	0	0	0	0	2	0	0	0	0	0	0	0	0	0	0	RP4-736L20.3
ENSG00000175279	4	4	5	18	12	15	5	4	0	0	5	13	0	3	3	17	APITD1
ENSG00000251503	0	0	0	0	0	0	0	0	0	0	0	0	0	0	0	0	APITD1-CORT
ENSG00000241563	2	1	0	0	1	1	0	1	0	0	0	2	0	0	2	6	CORT
ENSG00000160049	424	123	43	328	824	801	125	376	26	21	218	504	54	52	114	559	DFFA
ENSG00000203469	0	0	0	0	0	0	0	0	0	0	0	0	0	0	0	0	RP5-1113E3.3
ENSG00000142655	84	30	11	40	65	74	11	37	2	3	27	95	8	8	25	79	PEX14
ENSG00000243267	0	1	0	0	0	0	0	1	0	0	0	0	0	0	0	1	RN7SL614P
ENSG00000130940	41	42	12	13	19	30	1	7	0	3	8	43	3	11	40	168	CASZ1
ENSG00000272078	8	9	0	4	5	5	0	1	0	0	2	5	1	0	5	24	RP4-734G22.3
ENSG00000225158	0	0	0	0	0	0	0	0	0	0	0	0	0	0	0	2	HSPE1P24
ENSG00000175262	0	0	1	2	1	3	0	2	0	0	0	3	0	0	0	1	C1orf127
ENSG00000215785	1	0	0	0	0	0	0	0	0	0	0	0	0	0	0	1	CFL1P6
ENSG00000264181	0	0	0	0	0	0	0	0	0	0	0	0	0	0	0	0	AL713997.1
ENSG00000207213	0	0	0	0	0	0	0	0	0	0	0	0	0	0	0	0	Y_RNA
ENSG00000120948	244	196	60	279	360	467	116	255	21	17	118	192	43	78	117	649	TARDBP
ENSG00000009724	13	5	4	3	10	12	5	9	1	2	7	20	5	8	6	34	MASP2
ENSG00000271895	14	6	0	4	12	8	2	9	0	0	6	16	1	5	5	40	RP4-635E18.8
ENSG00000116649	70	37	14	177	242	235	45	135	6	5	48	147	15	10	24	93	SRM
ENSG00000171824	325	128	33	274	334	523	106	212	13	15	104	251	27	54	103	471	EXOSC10
ENSG00000226849	2	1	1	0	0	4	0	1	0	0	1	1	2	0	0	9	RP4-635E18.7
ENSG00000230337	0	2	0	1	1	1	1	4	0	0	0	2	0	0	0	3	RP4-635E18.6
ENSG00000198793	646	339	97	586	937	1366	259	657	32	36	182	436	36	107	119	909	MTOR
ENSG00000225602	0	0	1	1	2	1	0	1	0	0	0	0	0	0	1	3	MTOR-AS1
ENSG00000253086	0	0	0	0	1	2	0	0	0	0	0	0	0	0	0	1	RNU6-537P
ENSG00000271794	0	0	0	0	0	0	0	1	0	0	0	0	0	0	0	1	snoU13
ENSG00000171819	1	3	0	1	2	6	0	6	0	0	2	6	0	1	0	14	ANGPTL7
ENSG00000207451	0	0	0	0	1	0	0	0	0	0	0	0	0	0	0	0	RNU6-291P
ENSG00000238173	0	0	0	0	1	0	0	0	0	0	0	1	0	0	0	2	RPL39P6
ENSG00000120942	89	42	12	99	124	158	37	127	5	5	25	87	5	16	25	119	UBIAD1
ENSG00000238199	0	0	0	2	5	2	0	2	0	0	0	0	0	0	0	1	UBE2V2P3
ENSG00000224338	0	0	0	0	0	0	0	0	0	0	0	0	0	0	0	1	RP11-149P14.1
ENSG00000204624	3	18	8	26	28	62	6	16	0	0	0	0	0	17	26	149	PTCHD2
ENSG00000235643	0	1	1	0	0	0	0	0	0	0	0	0	0	0	0	18	RP1-69M21.2
ENSG00000116661	153	10	2	52	115	145	31	67	7	35	42	78	4	2	3	29	FBXO2
ENSG00000132879	74	19	8	56	97	104	19	53	2	5	33	95	5	10	20	101	FBXO44
ENSG00000116663	94	9	2	15	27	26	8	7	12	14	11	32	1	3	5	44	FBXO6
ENSG00000116670	107	185	64	374	795	628	198	415	2	8	53	146	11	40	109	564	MAD2L2
ENSG00000162490	13	369	112	175	315	421	103	183	2	2	2	3	0	181	350	1725	DRAXIN
ENSG00000177674	90	11	9	97	139	139	37	73	3	3	32	100	5	11	22	67	AGTRAP
ENSG00000215910	0	5	0	1	9	6	1	1	0	0	0	0	0	1	0	24	C1orf167
ENSG00000177553	0	0	0	0	0	0	0	0	0	0	0	0	0	0	1	0	RP11-56N19.5
ENSG00000177000	186	107	16	61	116	132	27	64	12	14	91	223	13	30	43	220	MTHFR
ENSG00000011021	78	149	34	66	136	142	23	71	10	12	57	108	24	20	43	371	CLCN6
ENSG00000242349	1	0	1	1	1	0	0	1	0	0	0	0	0	0	0	3	NPPA-AS1
ENSG00000175206	0	0	0	0	3	0	0	0	0	0	0	0	0	0	0	2	NPPA
ENSG00000120937	201	4	0	3	0	0	0	0	10	15	0	3	0	0	2	3	NPPB
ENSG00000224904	1	0	0	0	0	0	0	0	0	0	0	0	0	0	0	2	RP5-934G17.6
ENSG00000199347	3	4	0	14	10	7	1	10	0	0	4	11	1	0	2	20	RNU5E-1
ENSG00000201801	0	1	1	3	6	7	0	4	0	0	1	3	0	2	2	6	RNU5E-4P
ENSG00000116685	257	85	14	118	195	209	52	102	18	21	93	240	26	21	61	219	KIAA2013
ENSG00000083444	1089	79	20	122	250	259	65	124	47	41	683	1310	183	39	186	228	PLOD1
ENSG00000116688	657	207	61	300	457	578	150	272	42	41	201	545	43	70	127	586	MFN2
ENSG00000270914	0	0	0	0	0	0	0	0	0	0	0	0	0	0	0	1	RP5-1077B9.5
ENSG00000116691	61	47	10	80	172	119	40	99	5	6	33	76	8	17	34	177	MIIP
ENSG00000202461	0	0	0	1	1	1	0	0	0	0	0	0	0	1	0	4	Y_RNA
ENSG00000243539	0	0	0	0	0	0	0	0	0	0	0	0	0	0	0	1	RN7SL649P
ENSG00000120949	1	4	0	87	114	143	46	132	0	0	6	11	1	0	0	13	TNFRSF8
ENSG00000201135	0	0	0	0	0	0	0	0	0	0	0	0	0	0	0	0	RNU6-777P
ENSG00000227875	0	0	0	0	1	1	0	1	0	0	0	0	0	0	0	1	RP11-426M1.2
ENSG00000028137	21	5	1	7	15	18	4	4	1	0	19	25	0	3	8	36	TNFRSF1B
ENSG00000263676	0	0	0	0	0	0	0	0	0	0	0	0	0	0	0	0	MIR4632
ENSG00000225196	0	0	0	0	0	0	0	0	0	0	0	0	0	0	0	0	RP5-1118D24.2
ENSG00000252969	0	0	0	0	0	0	0	0	0	0	0	0	0	0	0	0	SNORA70
ENSG00000048707	701	221	65	198	445	590	94	303	75	61	256	772	49	92	169	834	VPS13D
ENSG00000239149	5	0	0	0	1	1	0	1	0	0	0	1	0	0	0	1	SNORA59A
ENSG00000229484	0	0	0	0	0	0	0	0	0	0	0	0	0	0	0	0	RP5-888M10.2
ENSG00000162496	555	51	5	54	48	73	31	40	58	82	101	580	42	10	23	47	DHRS3
ENSG00000221340	0	0	0	0	0	2	0	0	0	0	0	2	0	0	0	0	RNU6ATAC18P
ENSG00000272482	1	4	1	1	2	0	1	0	0	1	4	27	3	0	2	4	RP11-474O21.5
ENSG00000204518	0	0	0	0	0	0	0	0	0	0	0	0	0	0	0	1	AADACL4
ENSG00000226166	0	0	0	0	0	0	0	0	0	0	0	0	0	0	0	0	RP11-474O21.2
ENSG00000188984	0	0	0	5	1	4	2	4	0	0	0	0	0	0	0	0	AADACL3
ENSG00000238771	0	0	0	0	0	0	0	0	0	0	0	0	0	0	0	0	snoU13
ENSG00000157330	0	0	0	0	0	0	0	0	0	0	0	0	0	0	0	0	C1orf158
ENSG00000116726	0	0	0	0	0	0	0	0	0	0	0	0	0	0	0	0	PRAMEF12
ENSG00000116721	0	0	0	0	0	0	0	0	0	0	0	0	0	0	0	0	PRAMEF1
ENSG00000228338	0	0	0	0	0	0	0	0	0	0	0	0	0	0	0	0	RP5-845O24.8
ENSG00000204513	0	0	0	0	1	0	0	0	0	0	0	0	0	0	0	0	PRAMEF11
ENSG00000231103	0	0	0	0	0	0	0	0	0	0	0	0	0	1	0	0	RP5-845O24.3
ENSG00000179172	0	1	0	0	2	1	1	0	0	0	0	1	0	0	0	0	HNRNPCL1
ENSG00000120952	0	0	0	0	0	0	0	0	0	0	0	0	0	0	0	0	PRAMEF2
ENSG00000243073	0	0	0	0	0	0	0	0	0	0	0	0	0	0	0	0	PRAMEF4
ENSG00000187545	0	0	0	0	0	0	0	0	0	0	0	0	0	0	0	0	PRAMEF10
ENSG00000204510	0	0	0	0	0	0	0	0	0	0	0	0	0	0	0	0	PRAMEF7
ENSG00000207434	0	0	0	0	0	0	0	0	0	0	0	0	0	0	0	0	RNU6-1072P
ENSG00000234064	0	0	0	0	0	0	0	0	0	0	0	0	0	0	0	0	RP11-450I1.2
ENSG00000232423	0	0	0	0	0	0	0	0	0	0	0	0	0	0	0	0	PRAMEF6
ENSG00000250894	0	0	0	0	0	0	0	0	0	0	0	0	0	0	0	0	RP11-450I1.4
ENSG00000204508	0	0	0	0	0	0	0	0	0	0	0	0	0	0	0	0	PRAMEF22
ENSG00000239810	0	0	0	0	0	0	0	0	0	0	0	0	0	0	0	0	WI2-3308P17.2
ENSG00000270601	0	0	0	0	0	0	0	0	0	0	0	0	0	0	0	0	PRAMEF23
ENSG00000250113	0	0	0	0	0	0	0	0	0	0	0	0	0	0	0	0	RP13-221M14.6
ENSG00000204505	0	0	0	0	0	0	0	0	0	0	0	0	0	0	0	0	PRAMEF25
ENSG00000233336	0	0	0	0	0	0	0	0	0	0	0	0	0	0	0	0	RP13-221M14.2
ENSG00000229978	0	0	0	0	0	0	0	0	0	0	0	0	0	0	0	0	RP13-221M14.3
ENSG00000236179	0	0	0	0	0	0	0	0	0	0	0	0	0	0	0	0	RP13-221M14.4
ENSG00000179412	0	0	0	0	0	0	0	0	0	0	0	0	0	0	0	1	HNRNPCP5
ENSG00000224199	0	0	0	0	0	0	0	0	0	0	0	0	0	0	0	0	WI2-2994D6.1
ENSG00000229571	0	0	0	0	0	0	0	0	0	0	0	0	0	0	0	0	PRAMEF26
ENSG00000204503	0	0	0	0	0	0	0	0	0	0	0	0	0	0	0	0	PRAMEF3
ENSG00000233394	0	0	0	0	0	0	0	0	0	0	0	0	0	0	0	0	RP11-248D7.2
ENSG00000204502	0	0	0	0	0	0	0	0	0	0	0	0	0	0	0	0	PRAMEF5
ENSG00000231219	0	0	0	0	0	0	0	0	0	0	0	0	0	0	0	0	RP11-219C24.8
ENSG00000207511	0	0	0	0	0	0	0	0	0	0	0	0	0	0	0	0	RNU6-771P
ENSG00000182330	0	0	0	0	0	0	0	0	0	0	0	0	0	0	0	0	PRAMEF8
ENSG00000237700	0	0	0	0	0	0	0	0	0	0	0	0	0	0	0	0	RP11-219C24.6
ENSG00000204501	0	0	0	0	0	0	0	0	0	0	0	0	0	0	0	0	PRAMEF9
ENSG00000228229	0	0	0	0	0	0	0	0	0	0	0	0	0	0	0	0	RP11-219C24.10
ENSG00000204495	0	0	0	0	0	0	0	0	0	0	0	0	0	0	0	0	PRAMEF13
ENSG00000204491	0	0	0	0	0	0	0	0	0	0	0	0	0	0	0	0	PRAMEF18
ENSG00000204488	0	0	0	0	0	0	0	0	0	0	0	0	0	0	0	0	PRAMEF16
ENSG00000204486	0	0	0	0	0	0	0	0	0	0	0	0	0	0	0	0	PRAMEF21
ENSG00000204485	0	0	0	0	0	0	0	0	0	0	0	0	0	0	0	0	XX-FW84067D5.1
ENSG00000224581	0	0	0	0	0	0	0	0	0	0	0	0	0	0	0	0	XX-FW84067D5.2
ENSG00000157358	0	0	0	0	0	0	0	0	0	0	0	0	0	0	0	0	PRAMEF15
ENSG00000204481	0	0	0	0	0	0	0	0	0	0	0	0	0	0	0	0	PRAMEF14
ENSG00000204480	0	0	0	0	0	0	0	0	0	0	0	0	0	0	0	0	PRAMEF19
ENSG00000204479	0	0	0	0	0	0	0	0	0	0	0	0	0	0	0	0	PRAMEF17
ENSG00000204478	0	0	0	0	0	0	0	0	0	0	0	0	0	0	0	0	PRAMEF20
ENSG00000162494	1	1	0	0	0	0	0	2	0	0	0	0	0	0	0	3	LRRC38
ENSG00000259961	0	0	0	0	0	0	0	0	0	0	0	0	0	0	0	0	RP4-597A16.2
ENSG00000215909	0	0	0	0	0	0	0	0	0	0	0	0	0	0	0	0	RP4-597A16.3
ENSG00000162493	122	94	46	385	364	675	182	433	5	2	219	578	23	102	155	455	PDPN
ENSG00000222952	0	0	0	0	0	0	0	0	0	0	0	0	0	0	0	2	RNA5SP41
ENSG00000266358	0	0	0	0	0	0	0	0	0	0	0	0	0	0	0	0	AL359771.1
ENSG00000237445	1	1	0	0	0	0	0	0	0	0	0	0	0	0	0	1	CTA-520D8.2
ENSG00000253085	0	0	0	0	0	0	0	0	0	0	0	0	0	0	0	1	SCARNA11
ENSG00000116731	190	199	62	86	128	198	32	84	7	6	80	190	21	71	95	482	PRDM2
ENSG00000252151	0	0	0	0	0	0	0	0	0	0	0	0	0	0	0	0	RNU6-1265P
ENSG00000231606	0	1	0	0	0	0	0	0	0	0	0	0	0	0	0	0	RP11-344F13.1
ENSG00000234593	0	0	0	0	0	0	0	0	0	0	0	0	0	0	0	1	RP4-704D23.1
ENSG00000189337	20	67	20	15	31	40	5	16	3	3	24	59	1	23	32	177	KAZN
ENSG00000235829	0	0	0	0	0	1	0	2	0	0	0	0	1	0	0	6	TBCAP2
ENSG00000175147	5	0	0	1	4	3	1	1	0	2	0	6	0	0	0	8	TMEM51-AS1
ENSG00000171729	153	8	4	11	46	42	7	15	7	4	25	58	6	7	17	46	TMEM51
ENSG00000204464	3	3	1	1	1	3	2	1	0	0	0	0	1	0	0	3	C1orf195
ENSG00000215720	2	2	0	0	2	1	0	1	0	0	0	1	0	0	0	6	RP1-21O18.3
ENSG00000142621	3	18	8	5	9	11	0	1	1	0	4	5	2	0	2	154	FHAD1
ENSG00000233485	0	0	0	0	0	0	0	0	0	0	0	0	0	0	0	2	RP3-467K16.2
ENSG00000236045	0	0	0	0	0	1	0	0	0	0	0	0	0	0	0	1	RP3-467K16.7
ENSG00000228140	1	3	1	0	1	1	0	0	0	0	0	0	0	0	0	7	RP3-467K16.4
ENSG00000142634	162	26	9	46	62	53	18	45	5	9	36	162	13	14	25	93	EFHD2
ENSG00000162438	0	2	0	0	0	0	0	1	0	0	0	0	0	0	1	4	CTRC
ENSG00000142615	0	6	0	0	0	0	0	0	0	0	0	0	1	0	0	4	CELA2A
ENSG00000215704	0	2	0	0	0	0	0	0	0	0	4	1	1	0	1	3	CELA2B
ENSG00000132906	39	26	5	49	65	73	17	57	4	4	11	35	6	6	13	92	CASP9
ENSG00000116138	264	57	25	123	217	331	68	132	17	27	90	250	21	28	38	281	DNAJC16
ENSG00000251866	0	0	0	0	2	0	1	0	0	0	0	1	0	0	0	0	SCARNA21
ENSG00000272510	1	0	0	0	0	0	0	0	0	0	0	0	0	0	0	1	RP4-680D5.8
ENSG00000116771	92	1	0	18	20	26	10	18	16	50	13	35	7	1	0	13	AGMAT
ENSG00000237301	0	6	1	1	2	4	0	1	0	0	0	1	0	0	0	16	RP4-680D5.2
ENSG00000235084	1	1	0	1	0	0	0	1	0	1	1	1	0	0	0	1	CHCHD2P6
ENSG00000252417	0	0	0	0	1	0	0	0	0	0	0	0	0	0	0	0	RNU7-179P
ENSG00000236500	0	0	0	0	0	0	0	0	0	0	0	0	0	0	0	0	RP4-680D5.4
ENSG00000197312	330	96	20	235	412	516	94	335	44	27	61	167	20	32	51	288	DDI2
ENSG00000215695	0	0	0	0	0	0	0	0	0	0	0	0	0	0	0	0	RSC1A1
ENSG00000271742	0	0	0	0	0	0	0	0	0	0	0	0	0	0	0	1	RP4-680D5.9
ENSG00000116786	175	135	34	132	241	224	35	131	7	12	130	326	21	29	69	336	PLEKHM2
ENSG00000264048	0	0	0	0	0	0	0	0	0	0	0	0	0	0	0	0	AL121992.1
ENSG00000237938	2	0	0	1	2	1	1	1	0	0	0	1	0	0	0	4	RP11-288I21.1
ENSG00000162461	2	2	0	3	4	7	0	2	0	0	3	7	1	0	3	16	SLC25A34
ENSG00000224459	0	0	0	0	0	0	0	0	0	0	0	1	0	0	0	0	RP11-169K16.4
ENSG00000162460	8	0	0	0	2	1	1	1	5	4	0	1	0	0	0	1	TMEM82
ENSG00000162458	753	17	7	241	458	381	63	218	28	15	117	428	28	12	35	60	FBLIM1
ENSG00000224321	0	2	0	1	2	0	1	0	0	0	0	0	0	0	0	13	RP11-169K16.6
ENSG00000233954	36	24	6	39	69	38	15	35	2	4	24	30	2	12	11	69	RP11-169K16.7
ENSG00000178715	0	1	0	0	0	0	0	0	0	0	0	0	0	0	0	0	RP11-169K16.8
ENSG00000179743	8	30	13	16	26	19	1	10	0	1	9	26	3	6	17	54	RP11-169K16.9
ENSG00000065526	223	486	152	150	451	499	109	378	15	22	215	364	50	138	209	1782	SPEN
ENSG00000238818	0	0	0	0	0	1	0	0	0	0	0	0	0	0	0	0	snoU13
ENSG00000270620	0	0	0	0	0	1	1	0	0	0	0	0	0	0	0	4	RP1-134O19.3
ENSG00000116809	126	53	16	52	84	115	24	36	4	5	43	149	11	22	37	161	ZBTB17
ENSG00000234607	0	1	0	0	2	2	1	1	0	0	0	0	0	0	0	1	RP11-5P18.1
ENSG00000231353	0	0	0	0	0	0	0	0	0	0	0	0	0	0	0	0	RP11-5P18.3
ENSG00000224966	0	0	0	0	0	0	0	0	0	0	0	0	0	0	0	1	TBC1D3P6
ENSG00000183888	0	1	0	0	0	0	0	0	0	0	0	0	0	0	0	2	C1orf64
ENSG00000233078	0	0	0	0	0	0	0	0	0	0	0	0	0	0	0	0	RP11-5P18.5
ENSG00000173641	9	1	0	2	11	13	0	2	1	0	4	29	1	0	1	9	HSPB7
ENSG00000186510	4	5	0	1	10	16	3	1	0	0	4	8	1	0	2	2	CLCNKA
ENSG00000232456	0	4	0	1	0	2	0	0	0	0	1	1	0	0	0	4	RP11-5P18.10
ENSG00000184908	2	2	2	5	17	9	2	5	0	0	4	6	1	0	6	15	CLCNKB
ENSG00000185519	4	1	0	0	4	2	0	2	0	0	10	10	3	1	5	16	FAM131C
ENSG00000142627	194	137	28	118	156	123	33	82	5	7	100	112	97	16	32	416	EPHA2
ENSG00000227959	6	4	0	3	6	4	0	3	0	0	1	1	2	1	1	9	RP11-276H7.2
ENSG00000224621	4	0	0	0	0	0	0	0	0	0	0	1	0	0	0	1	RP11-276H7.3
ENSG00000234166	0	0	0	0	0	0	0	0	0	0	0	0	0	0	0	0	ARHGEF19-AS1
ENSG00000142632	5	9	2	132	213	144	52	84	0	0	7	26	2	4	16	25	ARHGEF19
ENSG00000237276	1	6	0	0	1	2	0	3	0	0	1	1	0	0	1	9	ANO7P1
ENSG00000204377	2	2	3	1	1	3	0	1	0	0	3	5	0	1	1	7	C1orf134
ENSG00000132881	4	10	2	2	13	7	3	1	0	0	8	18	0	0	2	8	RSG1
ENSG00000233929	0	1	0	1	3	0	0	1	0	0	0	3	0	0	2	2	MT1XP1
ENSG00000037637	194	135	33	89	162	178	40	97	11	13	80	217	36	52	92	481	FBXO42
ENSG00000055070	364	133	46	241	328	285	102	225	27	27	125	426	33	59	138	357	SZRD1
ENSG00000226457	2	2	0	2	4	1	0	1	0	0	1	2	3	1	1	4	RP11-430L17.1
ENSG00000187144	2	1	1	0	1	6	2	0	0	0	1	3	0	1	0	13	SPATA21
ENSG00000157191	358	62	20	81	147	134	30	90	11	18	82	211	31	22	44	190	NECAP2
ENSG00000226029	11	5	2	1	5	1	1	4	0	0	4	4	1	3	6	18	RP4-798A10.2
ENSG00000080947	19	18	6	12	36	32	5	12	3	1	10	22	7	9	12	115	CROCCP3
ENSG00000206652	4	7	3	7	28	19	2	6	2	0	9	28	2	3	14	14	RNU1-1
ENSG00000261135	1	5	1	0	2	1	1	2	2	0	2	4	0	0	3	13	RP4-798A10.7
ENSG00000224174	0	1	0	1	1	0	0	3	0	0	0	0	0	1	0	4	RP4-798A10.4
ENSG00000233421	5	138	23	9	6	6	2	9	0	0	0	0	0	1	8	457	U1
ENSG00000268674	0	0	0	0	0	0	0	0	0	0	0	0	0	0	0	0	FAM231B
ENSG00000225710	0	0	0	0	0	0	0	0	0	0	0	0	0	0	0	0	RP5-875O13.6
ENSG00000266584	0	0	0	0	0	0	0	0	0	0	0	0	0	0	0	0	AL355149.1
ENSG00000219481	177	274	81	82	188	172	32	78	16	35	144	263	51	86	174	999	NBPF1
ENSG00000271732	1	0	0	0	3	1	0	2	0	0	1	3	1	1	0	0	RP5-1182A14.5
ENSG00000215908	93	135	30	36	123	129	17	58	5	7	48	122	17	31	52	370	CROCCP2
ENSG00000186301	91	10	3	4	27	17	2	7	11	14	8	20	1	2	5	28	MST1P2
ENSG00000207513	0	0	0	0	0	0	0	0	0	0	0	0	0	0	0	0	RNU1-3
ENSG00000237847	0	0	0	0	0	0	0	0	0	0	0	0	0	0	0	0	FAM231A
ENSG00000264742	0	0	0	0	0	0	0	0	0	0	0	0	0	0	1	0	AL021920.1
ENSG00000236698	5	0	1	9	16	9	2	3	0	1	2	2	1	0	1	6	EIF1AXP1
ENSG00000268869	0	10	2	4	34	10	1	3	0	0	15	14	2	2	3	32	ESPNP
ENSG00000268991	0	0	0	0	0	0	0	0	0	0	0	0	0	0	0	0	FAM231C
ENSG00000058453	39	109	30	152	323	310	54	109	3	5	52	131	13	30	64	537	CROCC
ENSG00000207389	0	0	0	0	0	0	0	1	0	0	0	0	0	0	0	0	RNU1-4
ENSG00000227684	0	0	1	0	1	1	0	0	0	0	0	0	0	0	0	1	CROCCP4
ENSG00000186715	33	3	1	3	8	25	3	6	2	10	10	13	0	4	3	14	MST1L
ENSG00000223643	0	0	0	0	0	0	0	0	0	0	0	0	0	0	0	0	RP11-108M9.1
ENSG00000230239	0	0	0	0	0	0	0	0	0	0	0	0	0	0	0	0	RP11-108M9.2
ENSG00000263811	0	0	0	0	0	0	0	0	0	0	0	0	0	0	0	0	MIR3675
ENSG00000228549	2	99	22	8	13	13	4	4	0	0	4	1	0	0	6	394	U1
ENSG00000238142	10	1	0	6	9	13	1	1	0	0	0	0	0	0	0	0	RP11-108M9.4
ENSG00000235241	0	0	0	1	1	3	0	1	0	0	0	0	0	0	1	1	RP11-108M9.5
ENSG00000207005	2	0	1	2	5	11	0	3	1	0	0	7	0	0	2	9	RNU1-2
ENSG00000272426	3	1	0	2	2	9	1	2	0	0	3	2	1	0	0	6	RP11-108M9.6
ENSG00000117122	51	18	5	137	257	264	70	135	6	2	92	227	18	28	91	121	MFAP2
ENSG00000226526	0	0	0	1	3	1	0	0	0	0	0	1	0	0	2	3	RP1-37C10.3
ENSG00000159363	124	45	17	195	324	314	73	175	5	5	48	121	13	19	45	140	ATP13A2
ENSG00000117118	250	104	30	139	306	265	79	138	62	88	112	236	24	23	33	164	SDHB
ENSG00000117115	4	8	5	18	61	35	6	25	2	0	1	15	0	1	1	45	PADI2
ENSG00000252180	0	0	0	0	1	0	0	0	0	0	0	0	0	0	0	0	Y_RNA
ENSG00000204362	1	0	0	0	0	0	0	0	0	0	2	0	1	0	0	4	RP11-380J14.1
ENSG00000142623	0	0	1	1	3	3	0	2	0	0	2	1	1	0	0	3	PADI1
ENSG00000142619	0	0	0	3	16	7	1	11	0	0	1	0	0	0	0	11	PADI3
ENSG00000266634	0	0	0	0	0	0	0	0	0	0	0	0	0	0	0	0	MIR3972
ENSG00000159339	0	0	0	0	2	0	0	0	0	0	0	0	0	0	0	1	PADI4
ENSG00000269468	0	0	0	1	0	0	0	0	0	0	0	0	0	0	0	2	AC004824.2
ENSG00000256049	0	1	0	0	0	0	0	0	0	0	0	0	0	0	0	2	PADI6
ENSG00000227751	0	0	0	0	0	0	0	0	0	0	0	0	0	0	0	0	RP1-20B21.4
ENSG00000179051	413	255	94	2192	2772	3497	940	2075	13	18	182	648	75	149	288	978	RCC2
ENSG00000266727	0	0	0	0	0	0	0	0	0	0	0	0	0	0	0	0	AC004824.1
ENSG00000239020	0	0	0	0	0	0	0	0	0	0	0	0	0	0	0	0	snoU13
ENSG00000074964	296	85	23	108	177	259	40	92	16	18	116	311	30	42	66	364	ARHGEF10L
ENSG00000236648	0	1	0	0	0	0	0	0	0	0	0	0	0	0	0	1	RP11-473A10.2
ENSG00000117148	0	1	0	6	2	1	0	1	0	0	0	0	0	0	0	4	ACTL8
ENSG00000261781	0	0	0	0	0	0	0	0	0	0	0	0	0	0	0	0	RP11-174G17.2
ENSG00000117154	1	2	1	20	57	31	14	31	0	0	2	6	0	0	2	7	IGSF21
ENSG00000230035	0	0	0	0	2	0	0	0	0	0	0	1	0	0	0	0	RP11-174G17
ENSG00000225387	0	0	0	0	1	1	0	0	0	0	0	3	0	0	0	0	RP11-422P22.1
ENSG00000179023	5	1	1	91	117	54	9	33	6	6	0	14	2	0	0	1	KLHDC7A
ENSG00000235282	0	0	0	0	0	0	0	0	0	0	0	0	0	0	0	0	RP1-8B22.1
ENSG00000225478	0	0	0	0	0	0	0	0	0	0	0	0	0	0	0	0	RP1-8B22.2
ENSG00000009709	0	45	24	0	0	0	0	0	0	0	0	1	0	27	50	271	PAX7
ENSG00000179002	0	0	1	0	0	0	0	0	0	0	0	1	0	0	0	0	TAS1R2
ENSG00000255275	0	0	0	0	0	1	0	0	0	0	0	0	0	0	0	0	RP13-279N23.2
ENSG00000159423	8	4	8	51	88	126	29	50	0	3	12	19	1	8	8	33	ALDH4A1
ENSG00000265606	0	0	0	0	0	0	0	0	0	0	0	0	0	0	0	0	MIR4695
ENSG00000221662	0	0	0	0	0	0	0	0	0	0	0	0	0	0	0	0	MIR1290
ENSG00000169991	85	27	6	29	38	58	5	29	3	3	36	77	27	5	17	68	IFFO2
ENSG00000272084	8	2	1	4	5	6	0	5	1	0	1	2	1	3	1	8	RP5-1126H10.2
ENSG00000127481	2046	962	240	789	2228	2335	388	1384	146	118	559	1159	203	204	405	2705	UBR4
ENSG00000266098	1	1	0	0	1	2	4	3	0	0	0	0	0	0	0	2	AL137127.1
ENSG00000230424	1	2	0	1	0	0	0	2	0	0	0	1	0	1	0	2	RP1-43E13.2
ENSG00000127463	466	126	46	295	462	562	149	283	29	40	256	608	80	54	132	644	EMC1
ENSG00000053372	104	33	19	251	370	304	96	225	5	10	44	124	14	35	44	129	MRTO4
ENSG00000211454	0	4	2	2	7	2	0	1	0	0	0	4	1	1	2	10	AKR7L
ENSG00000162482	2	1	1	0	3	3	0	2	0	0	5	4	2	0	1	9	AKR7A3
ENSG00000270728	4	3	0	1	4	5	0	0	1	2	9	4	1	0	2	13	RP4-657E11.10
ENSG00000053371	124	46	22	79	152	94	26	52	12	18	92	201	17	33	81	166	AKR7A2
ENSG00000200403	0	0	0	1	0	1	0	0	0	0	1	0	0	0	0	1	RNU6-1099P
ENSG00000040487	136	10	3	31	79	60	15	26	4	10	32	57	8	6	12	56	PQLC2
ENSG00000265192	0	0	0	0	0	0	0	0	0	0	0	0	0	0	0	0	RN7SL85P
ENSG00000077549	459	130	40	288	478	475	119	297	20	28	125	314	18	58	86	406	CAPZB
ENSG00000240490	2	0	0	0	1	2	1	0	0	0	0	0	0	0	0	1	RN7SL277P
ENSG00000201609	0	0	0	0	0	0	0	0	0	0	0	0	0	0	0	0	RNU4-28P
ENSG00000239027	0	0	0	0	0	0	0	0	0	0	0	0	0	0	0	1	snoU13
ENSG00000235185	0	0	0	0	0	1	0	0	0	0	0	0	0	0	0	1	RP5-1056L3.1
ENSG00000270136	0	0	0	1	0	0	0	0	0	0	0	0	0	0	0	0	MINOS1-NBL1
ENSG00000173436	33	13	2	39	36	64	10	45	5	6	16	42	6	5	12	46	MINOS1
ENSG00000226396	3	2	0	1	13	12	4	8	0	1	1	5	0	1	0	6	RPS14P3
ENSG00000158747	50	2	1	4	3	7	2	7	5	1	19	63	6	3	10	13	NBL1
ENSG00000158748	0	0	0	1	10	1	0	3	0	0	0	0	0	0	2	0	HTR6
ENSG00000162542	61	0	0	19	33	31	8	15	4	1	6	25	1	0	1	2	TMCO4
ENSG00000178828	0	0	0	0	0	0	0	0	0	0	0	1	0	0	0	0	RNF186
ENSG00000235434	0	0	0	0	0	0	0	0	0	0	0	0	0	0	0	0	RP11-91K11.2
ENSG00000169914	199	120	20	91	173	224	20	93	11	15	58	112	15	42	81	373	OTUD3
ENSG00000188784	0	0	0	0	0	0	0	0	0	0	0	0	0	0	0	1	PLA2G2E
ENSG00000242688	0	0	0	0	0	0	0	0	0	0	0	0	0	0	0	0	RN7SL304P
ENSG00000188257	0	3	0	0	0	7	1	1	0	0	5	0	1	0	0	1	PLA2G2A
ENSG00000127472	1	0	0	0	0	0	0	0	0	0	0	0	0	0	0	2	PLA2G5
ENSG00000117215	0	1	0	0	0	0	0	0	0	0	0	0	0	0	0	0	PLA2G2D
ENSG00000158786	0	3	2	0	0	0	0	0	0	0	0	0	0	0	0	8	PLA2G2F
ENSG00000227066	0	0	0	0	0	0	0	0	0	0	0	0	0	0	0	0	RP3-340N1.2
ENSG00000187980	0	0	1	0	0	0	0	0	0	0	0	0	0	0	0	0	PLA2G2C
ENSG00000225986	0	0	0	0	0	0	0	0	0	0	0	0	0	0	0	2	UBXN10-AS1
ENSG00000162543	3	3	5	4	15	13	4	9	0	0	0	6	1	9	10	46	UBXN10
ENSG00000228105	0	0	0	0	0	0	0	0	0	0	0	0	0	0	0	0	RP3-340N1.6
ENSG00000158816	1	13	4	4	3	2	0	2	0	0	0	0	0	0	0	34	VWA5B1
ENSG00000226664	0	0	0	0	0	0	0	0	0	0	0	0	0	0	0	2	RP4-745E8.2
ENSG00000236963	0	0	0	0	0	0	0	0	0	0	0	0	0	0	0	1	LINC01141
ENSG00000226487	0	0	0	0	0	0	0	0	0	0	0	0	0	0	0	0	RP4-749H3.2
ENSG00000162545	209	78	29	5	5	12	2	8	8	14	82	161	14	16	23	166	CAMK2N1
ENSG00000090432	127	57	7	50	104	82	24	49	5	12	43	107	7	20	23	110	MUL1
ENSG00000215520	0	0	0	0	0	0	0	0	0	0	0	0	0	0	0	2	RPS4XP4
ENSG00000183114	0	9	1	4	8	10	0	5	0	0	1	1	1	1	1	12	FAM43B
ENSG00000158825	1	0	0	5	3	7	1	4	1	1	0	0	0	0	0	0	CDA
ENSG00000158828	87	28	6	15	33	55	11	16	4	11	17	63	2	5	16	57	PINK1
ENSG00000117242	37	12	1	7	20	7	8	4	0	0	9	21	4	3	3	35	PINK1-AS
ENSG00000257033	0	0	0	0	0	0	0	0	0	0	0	0	0	0	0	0	AL391357.1
ENSG00000244038	1152	146	45	590	910	951	237	463	64	68	546	1327	108	86	204	577	DDOST
ENSG00000117245	6	28	7	26	147	77	13	50	0	0	4	7	1	8	9	121	KIF17
ENSG00000235432	1	1	0	0	4	3	0	1	0	0	0	0	0	0	0	2	RP5-930J4.5
ENSG00000189410	2	23	3	81	107	135	23	96	0	1	7	3	2	13	5	57	SH2D5
ENSG00000233069	1	0	0	1	0	0	0	0	0	0	1	0	0	0	0	1	RP5-930J4.2
ENSG00000127483	826	489	135	206	664	673	124	330	29	38	201	728	104	194	341	1428	HP1BP3
ENSG00000203394	0	0	0	0	0	0	0	0	0	0	0	0	0	0	0	0	RP5-930J4.4
ENSG00000075151	623	316	105	407	817	1087	217	476	41	29	229	630	58	154	232	1071	EIF4G3
ENSG00000251914	0	0	0	0	0	0	0	0	0	0	0	0	0	0	0	1	RNU7-200P
ENSG00000221808	0	0	0	0	0	1	0	1	0	0	0	0	0	0	0	1	MIR1256
ENSG00000233072	0	1	0	1	0	2	0	2	0	0	1	0	0	0	0	13	RPS15AP6
ENSG00000236073	0	0	0	1	1	0	0	0	0	0	0	0	0	0	0	0	RP11-487E1.2
ENSG00000235112	1	0	0	1	1	0	0	2	0	0	1	0	0	0	0	5	HSPE1P27
ENSG00000266867	0	0	0	0	0	0	0	1	0	0	0	0	0	0	0	0	AL031005.1
ENSG00000117298	1315	93	23	216	301	275	79	146	75	33	261	459	57	21	39	332	ECE1
ENSG00000236936	3	1	0	0	3	2	0	0	0	0	0	0	0	0	1	2	RP3-329E20.2
ENSG00000231105	1	4	0	0	2	0	2	0	0	0	3	4	0	0	2	6	RP5-1071N3.1
ENSG00000236216	0	0	0	0	0	0	0	0	0	0	0	0	0	0	0	0	PPP1R11P1
ENSG00000228823	0	0	0	0	0	0	0	0	0	0	0	0	0	0	0	0	RP11-293F5.8
ENSG00000236009	0	0	0	0	0	0	0	0	0	0	0	0	0	0	0	0	RP11-293F5.1
ENSG00000227001	2	2	1	2	3	1	0	0	0	0	1	1	0	0	1	4	NBPF2P
ENSG00000187952	1	0	0	0	1	2	2	1	0	0	0	1	0	1	0	1	HS6ST1P1
ENSG00000186543	0	0	0	0	1	0	0	0	0	0	0	0	0	0	0	2	CROCCP5
ENSG00000142794	26	18	5	7	50	45	5	8	2	1	13	47	4	1	4	46	NBPF3
ENSG00000176378	0	0	0	0	0	0	0	0	0	0	0	0	0	0	0	0	PFN1P10
ENSG00000162551	7	23	14	388	598	603	153	340	0	1	4	7	1	14	21	129	ALPL
ENSG00000233431	1	0	0	0	0	1	0	0	0	0	0	0	0	0	0	5	RP11-63N8.3
ENSG00000221781	0	0	0	0	0	0	0	0	0	0	0	0	0	0	0	0	AL359815.1
ENSG00000076864	156	15	6	27	43	41	4	20	8	8	67	93	37	5	7	80	RAP1GAP
ENSG00000090686	223	152	39	234	412	494	106	286	16	15	116	256	53	65	96	444	USP48
ENSG00000231978	1	0	1	2	1	0	0	0	0	0	1	0	0	0	1	1	RP11-132G19.3
ENSG00000187942	1	2	0	1	8	6	0	1	0	1	1	5	0	0	1	14	LDLRAD2
ENSG00000142798	972	210	39	292	978	552	108	338	23	11	1478	2469	471	39	108	877	HSPG2
ENSG00000232037	0	0	0	3	0	1	0	0	0	0	0	4	0	1	0	1	RP11-26H16.1
ENSG00000219073	1	2	1	0	0	0	0	0	0	0	0	3	0	0	0	10	CELA3B
ENSG00000264385	0	0	0	0	0	0	0	0	0	0	0	0	0	0	0	0	RN7SL421P
ENSG00000263991	0	0	0	0	0	0	0	0	0	0	0	0	0	0	0	0	RN7SL386P
ENSG00000201919	0	0	0	0	0	0	0	0	0	0	0	0	0	0	0	0	RNU6-1022P
ENSG00000142789	0	2	0	0	0	0	0	0	0	0	0	9	0	0	0	1	CELA3A
ENSG00000263582	0	0	0	0	0	0	0	0	0	0	0	0	0	0	0	0	RN7SL768P
ENSG00000263929	0	0	0	0	0	0	0	0	0	0	1	0	0	0	0	0	RN7SL186P
ENSG00000201273	0	0	0	0	0	0	0	0	0	0	0	0	0	0	0	0	RNU6-776P
ENSG00000228397	1	10	2	0	1	2	0	0	0	0	1	0	0	0	0	48	RP1-224A6.3
ENSG00000218510	31	12	2	35	47	54	12	26	2	6	29	58	5	9	12	40	LINC00339
ENSG00000070831	2708	629	140	695	958	1230	292	603	162	222	629	1538	179	247	440	1494	CDC42
ENSG00000230068	0	2	1	1	2	3	1	3	2	0	1	4	1	0	1	5	CDC42-IT1
ENSG00000271428	1	2	0	0	2	1	0	0	0	0	0	2	0	0	0	4	RP1-224A6.8
ENSG00000271840	4	9	0	2	5	0	1	1	1	0	0	2	3	0	0	3	RP1-224A6.9
ENSG00000162552	36	4	0	1	11	15	0	3	3	2	6	3	0	10	17	26	WNT4
ENSG00000266564	0	0	0	0	0	0	0	0	0	0	0	0	0	0	0	0	MIR4418
ENSG00000234397	0	0	0	0	0	0	0	0	0	0	0	0	0	0	0	0	RP11-415K20.1
ENSG00000184677	325	137	45	178	218	275	76	134	20	22	86	199	42	32	83	326	ZBTB40
ENSG00000237200	4	0	1	1	2	2	0	1	0	0	1	2	0	1	0	7	ZBTB40-IT1
ENSG00000070886	2	4	1	19	19	19	6	15	0	0	2	28	1	1	1	10	EPHA8
ENSG00000173372	0	0	0	0	0	0	0	0	0	0	0	0	0	0	0	0	C1QA
ENSG00000159189	0	0	0	0	0	0	0	0	0	0	0	0	0	0	0	0	C1QC
ENSG00000173369	0	0	0	0	0	0	0	0	0	0	0	0	0	0	0	2	C1QB
ENSG00000133216	32	146	54	89	88	162	23	72	2	1	42	126	19	61	78	794	EPHB2
ENSG00000265422	0	0	0	0	0	0	0	0	0	0	0	0	0	0	0	1	MIR4684
ENSG00000216157	0	0	0	0	0	0	0	0	0	0	0	0	0	0	0	1	AL611946.1
ENSG00000225952	0	0	0	0	0	0	0	0	0	0	0	0	0	0	1	2	RP11-69E9.1
ENSG00000264014	0	0	0	0	0	0	0	0	0	0	0	0	0	0	0	0	MIR4253
ENSG00000272796	2	22	8	1	2	5	1	3	0	1	5	22	0	13	9	125	RP1-74M1.3
ENSG00000215906	0	0	2	0	0	0	0	0	0	2	0	0	0	0	0	2	LACTBL1
ENSG00000227868	0	0	0	0	1	1	0	0	0	0	0	0	0	0	0	1	C1orf234
ENSG00000004487	598	574	181	1188	1914	2161	445	1156	28	41	421	958	148	366	620	1953	KDM1A
ENSG00000240553	1	14	1	2	6	4	0	3	0	0	1	3	1	1	0	17	RP1-184J9.2
ENSG00000263793	0	3	0	0	1	1	0	0	0	0	0	0	0	0	1	1	MIR3115
ENSG00000266802	0	1	1	0	0	1	0	1	0	0	0	1	0	0	1	5	MIR4419A
ENSG00000169641	714	78	21	438	515	678	161	454	23	31	103	271	23	40	89	410	LUZP1
ENSG00000229010	1	1	1	0	0	2	0	2	0	0	0	1	1	0	0	0	RP5-979D14.1
ENSG00000206935	0	1	1	0	1	1	0	0	0	0	0	0	0	0	1	1	RNU6-514P
ENSG00000252578	3	0	0	0	0	0	0	0	0	0	0	0	0	0	0	0	RNU6-135P
ENSG00000179546	8	9	5	22	7	37	10	10	0	0	0	0	0	2	1	30	HTR1D
ENSG00000215381	0	0	0	0	0	0	0	1	0	0	1	0	0	0	0	0	RP5-1057J7.1
ENSG00000261326	29	19	10	5	32	20	6	11	3	2	22	37	9	13	28	116	RP5-1057J7.6
ENSG00000125944	724	499	151	746	880	1282	339	715	41	50	309	822	126	333	656	1715	HNRNPR
ENSG00000125945	79	41	12	7	14	23	5	11	4	5	85	264	19	44	80	226	ZNF436
ENSG00000249087	13	25	5	0	1	3	1	0	0	2	14	59	3	9	16	67	C1orf213
ENSG00000201405	0	0	0	0	0	0	0	0	0	0	0	0	0	0	0	0	Y_RNA
ENSG00000271420	2	0	0	0	0	0	0	0	1	1	0	0	0	0	0	2	RP5-1057J7.7
ENSG00000204219	99	4	1	0	0	0	1	0	7	16	20	59	2	1	7	17	TCEA3
ENSG00000232482	0	0	0	0	0	0	0	0	0	0	0	0	0	0	0	1	RP4-654C18.1
ENSG00000088280	273	79	32	198	323	346	75	180	10	15	121	270	22	66	146	359	ASAP3
ENSG00000007968	2	9	14	52	52	66	22	18	1	1	12	31	1	31	32	63	E2F2
ENSG00000235052	0	1	0	0	3	3	0	1	0	0	0	2	0	0	0	0	RP1-150O5.3
ENSG00000117318	207	36	28	251	299	286	101	206	15	11	95	337	1	64	177	116	ID3
ENSG00000197880	0	0	0	0	0	0	0	0	0	0	0	0	0	0	0	8	MDS2
ENSG00000229239	0	0	0	0	0	0	0	0	0	0	0	0	0	0	0	0	RP11-223J15.2
ENSG00000142676	1736	2058	619	1862	3328	3499	817	1857	168	170	1474	3134	403	455	990	5293	RPL11
ENSG00000203589	0	2	0	0	1	1	1	0	0	0	0	0	0	0	0	4	RP5-886K2.1
ENSG00000244609	0	1	0	0	0	1	0	0	0	0	0	0	0	0	0	5	RN7SL532P
ENSG00000011007	353	391	52	325	522	635	157	363	22	35	113	297	48	53	91	518	TCEB3
ENSG00000236810	2	4	0	0	6	3	1	3	0	0	1	11	0	4	4	16	RP5-886K2.3
ENSG00000057757	178	170	31	176	298	368	86	195	16	18	91	182	21	41	85	333	PITHD1
ENSG00000011009	406	66	25	256	451	399	125	243	24	30	81	243	30	24	47	165	LYPLA2
ENSG00000117308	212	27	8	52	61	83	12	35	12	12	69	188	20	18	18	43	GALE
ENSG00000117305	263	28	11	24	88	74	12	35	29	45	100	193	14	15	27	100	HMGCL
ENSG00000179163	188	25	3	15	67	89	11	21	19	34	71	165	9	4	7	22	FUCA1
ENSG00000188822	0	0	1	0	0	0	0	0	0	0	0	0	0	0	0	1	CNR2
ENSG00000264347	0	0	0	0	0	0	0	0	0	0	0	0	0	0	0	0	RN7SL24P
ENSG00000238538	0	0	0	0	0	0	0	0	0	0	0	0	0	0	0	0	snoU13
ENSG00000229106	1	0	0	0	0	0	0	0	0	0	0	0	0	0	0	2	RP11-4M23.2
ENSG00000232557	0	0	0	0	0	0	0	0	0	0	0	0	0	0	0	1	RP11-4M23.3
ENSG00000264926	0	0	0	0	0	0	0	0	0	0	0	0	0	0	0	0	MIR378F
ENSG00000230228	0	0	0	0	0	0	0	0	0	0	0	0	0	0	0	0	RP11-4M23.4
ENSG00000189266	40	11	8	39	24	52	0	1	3	3	12	28	11	6	16	41	PNRC2
ENSG00000188529	36	34	9	42	53	80	15	44	2	2	17	35	14	10	23	92	SRSF10
ENSG00000215905	0	0	0	0	0	0	0	0	0	0	0	0	0	0	0	0	RP11-4M23.7
ENSG00000225315	0	0	0	0	0	0	0	0	0	0	0	0	0	0	0	0	RP11-293P20.2
ENSG00000142661	0	2	2	2	1	0	0	0	0	0	1	5	0	4	0	10	MYOM3
ENSG00000230703	0	0	0	0	0	0	0	0	0	0	0	0	0	0	0	0	RP11-293P20.4
ENSG00000142677	3	0	1	2	0	0	1	0	1	0	0	1	0	0	0	1	IL22RA1
ENSG00000185436	59	2	0	48	61	79	11	30	3	6	19	19	5	0	1	7	IFNLR1
ENSG00000230023	0	0	0	0	0	0	0	0	0	0	0	0	0	0	0	0	RP11-10N16.2
ENSG00000221032	0	0	0	0	0	0	0	0	0	0	0	0	0	0	0	0	AL590683.1
ENSG00000266511	0	0	0	0	0	0	0	0	0	0	0	0	0	0	0	0	AL590683.2
ENSG00000232298	0	0	1	0	0	0	0	0	0	0	0	0	0	0	0	3	RP11-10N16.3
ENSG00000158055	1	0	0	3	4	10	4	5	0	0	2	1	0	0	0	5	GRHL3
ENSG00000001460	21	11	4	28	43	56	7	19	3	5	17	37	4	13	9	52	STPG1
ENSG00000001461	81	31	6	37	90	99	23	47	4	13	87	164	7	7	27	71	NIPAL3
ENSG00000117602	255	27	8	105	166	190	57	105	13	18	128	237	40	11	17	120	RCAN3
ENSG00000266551	0	0	0	0	0	0	0	0	0	0	0	0	0	0	0	0	RN7SL857P
ENSG00000264443	0	0	0	0	0	0	0	0	0	0	0	4	0	0	0	1	RP4-594I10.3
ENSG00000184454	37	0	0	1	3	2	1	2	9	20	39	67	10	0	0	1	NCMAP
ENSG00000227312	0	0	0	0	0	0	0	0	0	0	0	0	0	0	0	1	RP11-496D1.2
ENSG00000239106	0	0	0	0	0	0	0	0	0	0	0	0	0	0	0	0	Y_RNA
ENSG00000133226	295	528	137	366	719	835	164	480	26	17	141	420	102	86	181	973	SRRM1
ENSG00000238986	1	2	0	0	0	0	0	0	0	0	0	0	0	0	0	0	snoU13
ENSG00000169504	1932	526	215	1586	2507	3278	777	1825	186	189	463	1263	146	232	482	2418	CLIC4
ENSG00000238482	0	0	0	1	2	1	0	1	0	0	1	0	0	0	0	0	RNU6-1208P
ENSG00000020633	2	0	0	0	0	7	0	0	1	2	0	4	0	1	0	4	RUNX3
ENSG00000229162	0	1	0	0	0	0	0	0	0	0	0	0	0	0	0	0	RP11-84D1.1
ENSG00000261025	0	0	0	0	0	0	0	0	0	0	0	1	0	0	0	2	RP11-84D1.2
ENSG00000264371	0	1	0	0	0	0	0	0	0	0	0	0	0	0	0	0	MIR4425
ENSG00000233755	0	0	0	0	0	1	0	0	0	0	0	0	0	0	0	1	RP4-799D16.1
ENSG00000233419	0	0	1	0	0	0	0	0	0	0	0	0	0	0	0	0	RP4-781L3.1
ENSG00000231953	0	0	0	0	0	0	0	0	0	0	0	0	0	0	0	0	RP4-706G24.1
ENSG00000117614	196	200	43	86	140	172	44	67	7	6	51	192	23	29	58	281	SYF2
ENSG00000117616	261	213	35	79	185	221	50	98	27	11	94	178	40	29	66	458	C1orf63
ENSG00000272432	0	0	0	0	1	0	0	0	0	1	0	1	0	0	0	3	RP3-465N24.6
ENSG00000261349	1	1	0	0	3	1	0	0	0	0	0	3	0	0	1	3	RP3-465N24.5
ENSG00000187010	3	1	0	2	1	1	0	0	0	0	2	3	0	0	0	3	RHD
ENSG00000224183	2	1	0	0	1	2	0	0	0	0	0	0	0	0	1	0	SDHDP6
ENSG00000259984	1	1	0	0	2	1	1	0	0	0	2	0	0	0	0	3	RP11-335G20.7
ENSG00000183726	393	124	40	188	256	362	84	217	17	33	104	274	36	49	98	292	TMEM50A
ENSG00000252515	1	1	0	0	0	0	0	0	0	0	1	0	0	0	0	0	RNU6-1171P
ENSG00000238889	0	0	0	0	1	1	0	1	0	0	0	0	0	0	0	1	snoU13
ENSG00000188672	2	6	1	0	1	0	0	0	0	0	7	9	1	1	2	9	RHCE
ENSG00000238084	3	0	0	0	0	0	1	1	0	1	0	1	0	0	0	0	RP3-469D22.1
ENSG00000266468	0	0	0	0	0	0	0	0	0	0	0	0	0	0	0	0	AL031284.1
ENSG00000204178	287	56	16	72	126	132	45	72	23	35	84	151	20	25	45	244	TMEM57
ENSG00000157978	62	30	4	46	108	114	30	33	5	6	49	141	5	7	12	96	LDLRAP1
ENSG00000225643	0	5	0	0	3	0	0	1	0	0	2	0	0	0	0	3	RP11-70P17.1
ENSG00000117643	19	33	6	16	37	48	10	15	2	1	92	343	10	3	7	96	MAN1C1
ENSG00000233478	0	0	0	0	2	0	0	1	0	0	3	5	1	0	0	9	RP1-187B23.1
ENSG00000162430	270	136	47	187	407	318	61	168	5	8	215	532	27	70	70	490	SEPN1
ENSG00000255054	0	0	0	0	0	0	0	0	0	0	0	0	0	0	0	0	RP1-317E23.6
ENSG00000228172	0	0	0	0	0	0	0	0	0	0	0	2	0	1	0	1	RP1-317E23.3
ENSG00000117640	192	23	16	51	110	126	19	56	14	25	60	198	23	25	66	167	MTFR1L
ENSG00000223474	5	0	0	0	3	1	0	1	0	0	0	5	0	2	0	2	AL020996.1
ENSG00000272478	0	0	0	0	0	0	0	0	0	0	0	1	0	0	0	0	RP1-317E23.7
ENSG00000127423	11	5	6	115	153	182	39	86	0	0	11	17	2	8	18	28	AUNIP
ENSG00000236528	1	0	0	1	0	0	0	0	0	0	0	2	1	0	0	0	RP1-125I3.2
ENSG00000182749	130	11	3	23	38	34	8	19	60	38	28	66	8	4	15	52	PAQR7
ENSG00000207302	0	0	1	0	0	0	0	0	0	0	0	0	0	2	0	0	Y_RNA
ENSG00000117632	381	508	247	950	1412	1578	467	858	24	21	348	670	125	521	821	1978	STMN1
ENSG00000229786	0	0	0	0	0	0	0	0	0	0	0	0	0	2	0	2	SNRPFP2
ENSG00000223624	0	0	0	1	0	0	0	0	0	0	0	0	1	0	0	2	RP1-125I3.4
ENSG00000264021	0	0	0	0	0	0	0	0	0	0	0	0	0	0	0	0	MIR3917
ENSG00000266763	0	0	0	0	0	0	0	0	0	0	0	0	0	0	0	0	AL033528.1
ENSG00000158006	120	14	6	36	51	68	19	22	14	22	30	70	5	5	15	80	PAFAH2
ENSG00000207237	0	0	0	0	0	1	0	0	0	0	0	0	0	0	0	0	RNU6-110P
ENSG00000252190	0	0	0	0	0	0	0	0	0	0	0	0	0	0	0	0	SCARNA17
ENSG00000252691	0	0	0	0	0	0	0	0	0	0	0	0	0	0	0	0	SCARNA18
ENSG00000158008	3	4	1	1	17	16	3	8	0	2	18	55	0	2	5	30	EXTL1
ENSG00000158014	4	13	3	2	5	12	2	8	0	12	0	9	1	0	0	93	SLC30A2
ENSG00000158022	5	1	1	0	0	0	0	0	0	1	1	3	0	2	0	0	TRIM63
ENSG00000265320	0	0	0	0	0	0	0	0	0	0	0	0	0	0	0	0	AL391650.1
ENSG00000175087	64	33	12	19	45	73	18	37	6	8	49	125	19	48	50	120	PDIK1L
ENSG00000197245	0	1	1	2	0	1	0	1	0	0	0	0	0	0	0	0	FAM110D
ENSG00000142684	0	0	2	5	4	6	0	1	0	0	0	3	0	0	0	11	ZNF593
ENSG00000236782	0	2	0	3	0	1	0	1	0	0	0	0	0	0	0	6	RP11-96L14.7
ENSG00000142675	58	17	2	17	68	63	15	19	1	3	0	0	0	1	3	32	CNKSR1
ENSG00000188782	0	0	0	3	6	1	0	1	0	0	0	0	0	1	0	5	CATSPER4
ENSG00000236155	10	1	1	4	7	2	1	2	1	1	1	1	0	1	0	2	RP11-231P20.2
ENSG00000130695	81	103	19	165	355	412	69	182	8	16	52	103	13	55	65	225	CEP85
ENSG00000270733	0	0	0	1	1	2	1	0	0	0	0	0	0	0	1	3	RP11-231P20.5
ENSG00000142669	447	34	16	68	79	120	17	52	16	16	27	135	9	20	25	135	SH3BGRL3
ENSG00000158062	30	17	8	11	35	45	8	15	0	0	20	51	8	12	21	82	UBXN11
ENSG00000169442	5	0	0	1	4	2	0	1	0	0	0	0	0	0	0	5	CD52
ENSG00000176092	39	6	0	34	66	90	11	32	2	8	3	2	0	0	1	12	AIM1L
ENSG00000225854	3	0	0	0	1	1	0	2	0	0	0	0	0	0	0	1	RP11-569G9.7
ENSG00000265143	0	0	0	0	0	0	0	0	0	0	0	0	0	0	0	0	RN7SL490P
ENSG00000176083	0	2	0	0	0	0	0	0	0	0	0	0	0	0	0	0	ZNF683
ENSG00000131914	157	446	111	6294	7587	9028	2446	5688	1	8	1	2	2	19	30	1990	LIN28A
ENSG00000117682	229	168	48	122	222	231	53	102	37	41	57	183	11	32	41	555	DHDDS
ENSG00000223583	5	0	1	0	3	6	0	3	0	0	0	0	0	0	1	1	RP3-476K8.4
ENSG00000225891	0	0	1	2	2	3	1	0	1	0	0	4	0	2	1	8	RP3-476K8.3
ENSG00000198830	235	257	131	537	545	604	245	428	18	25	149	420	35	203	362	1022	HMGN2
ENSG00000224129	0	0	1	0	0	0	0	0	0	0	0	0	0	0	0	0	DPPA2P2
ENSG00000117676	171	42	10	166	209	303	60	146	18	11	80	138	20	11	23	142	RPS6KA1
ENSG00000238705	0	0	0	0	0	0	0	0	0	0	0	0	0	0	0	0	MIR1976
ENSG00000243905	0	0	0	0	0	0	0	0	0	0	0	0	0	0	0	1	RN7SL679P
ENSG00000252802	0	0	0	0	0	0	0	0	0	0	0	0	0	0	0	0	Y_RNA
ENSG00000229247	0	0	0	0	0	0	0	0	0	0	0	0	0	0	0	0	RP11-492M19.3
ENSG00000238316	0	0	0	0	0	0	0	0	0	0	0	0	0	0	0	0	snoU13
ENSG00000235069	0	0	0	0	0	0	0	0	0	0	0	0	0	0	0	0	RP4-785J1.1
ENSG00000260063	3	3	0	3	2	4	1	2	0	0	0	5	1	3	1	10	RP5-968P14.2
ENSG00000117713	471	438	135	364	805	957	238	584	40	30	222	566	65	157	230	1331	ARID1A
ENSG00000266138	1	0	0	0	1	2	0	0	0	0	0	0	0	0	0	1	RN7SL501P
ENSG00000060642	39	16	5	25	53	55	5	25	7	6	31	55	3	5	20	41	PIGV
ENSG00000241188	0	0	0	0	0	0	0	0	0	0	0	0	0	0	0	0	RN7SL165P
ENSG00000204160	124	76	11	91	153	186	40	82	4	13	47	93	12	17	29	210	ZDHHC18
ENSG00000175793	13	1	1	5	8	2	1	3	0	0	0	0	0	0	0	7	SFN
ENSG00000226698	0	0	0	0	0	0	0	0	0	0	0	0	0	0	0	0	RP1-50O24.6
ENSG00000142751	192	91	22	58	118	107	25	61	9	18	57	198	19	19	28	233	GPN2
ENSG00000198746	74	25	10	33	32	52	8	37	6	9	13	39	1	6	14	60	GPATCH3
ENSG00000090273	215	206	64	271	329	420	111	234	12	16	64	218	16	50	63	428	NUDC
ENSG00000131910	18	0	0	0	0	0	0	0	0	0	41	63	26	0	0	1	NR0B2
ENSG00000175707	64	2	0	40	100	71	13	36	4	6	23	41	1	1	0	8	C1orf172
ENSG00000172746	0	0	0	0	2	1	0	0	0	0	0	0	0	0	0	2	RP11-344H11.4
ENSG00000224064	0	0	0	0	0	0	0	0	0	0	0	0	0	0	0	0	RP11-344H11.5
ENSG00000225294	1	1	0	0	0	0	1	1	0	0	1	0	0	0	0	0	OSTCP2
ENSG00000253368	305	4	3	89	94	124	29	95	12	14	52	91	32	6	9	23	TRNP1
ENSG00000158246	76	14	3	521	572	675	179	526	3	1	12	39	4	7	6	80	FAM46B
ENSG00000090020	74	40	14	66	72	93	21	45	5	4	40	79	8	13	11	97	SLC9A1
ENSG00000229985	0	0	0	0	0	0	0	0	0	0	0	0	0	0	0	0	RP11-40H20.5
ENSG00000214973	1	1	0	1	2	4	0	5	0	0	0	0	0	0	0	0	CHCHD3P3
ENSG00000225159	2	1	0	11	9	6	1	7	0	0	0	4	0	2	2	3	NPM1P39
ENSG00000225990	0	0	0	0	0	0	0	0	0	0	0	0	0	0	0	0	SNRPEP7
ENSG00000224311	0	0	0	0	0	2	0	0	0	0	0	0	0	0	0	0	RP11-40H20.4
ENSG00000142784	245	80	17	62	134	134	25	62	14	21	111	186	30	23	63	305	WDTC1
ENSG00000252098	0	0	0	0	0	0	0	0	0	0	0	0	0	0	0	0	Y_RNA
ENSG00000243659	0	0	0	0	0	1	0	1	0	0	0	1	0	0	0	5	RP11-4K3__A.3
ENSG00000186501	97	40	10	39	88	96	21	49	9	11	38	140	16	16	42	120	TMEM222
ENSG00000206888	2	1	0	0	0	1	0	1	0	0	1	0	0	0	1	2	RNU6-48P
ENSG00000241547	1	1	0	1	7	3	0	1	0	0	2	3	0	0	0	14	RP11-4K3__A.5
ENSG00000142765	31	17	2	22	52	41	8	21	1	0	47	79	11	2	4	46	SYTL1
ENSG00000142733	67	34	10	26	58	47	12	24	3	2	50	113	11	6	18	137	MAP3K6
ENSG00000142748	0	0	0	0	3	0	0	1	0	0	0	3	1	0	0	14	FCN3
ENSG00000174950	0	2	0	4	9	9	1	2	0	0	1	2	1	0	0	9	CD164L2
ENSG00000231207	0	0	0	0	1	1	0	0	0	0	0	0	0	0	0	1	RP1-144C9.2
ENSG00000181773	1	16	2	14	39	34	5	12	0	0	5	10	3	2	1	26	GPR3
ENSG00000158195	468	172	46	168	461	363	91	239	29	37	155	361	86	39	120	558	WASF2
ENSG00000241169	1	0	1	0	0	0	0	0	0	0	0	1	0	0	1	2	RP4-752I6.1
ENSG00000237429	1	0	0	0	0	2	0	0	0	0	2	1	0	0	0	2	RP1-159A19.4
ENSG00000126705	117	103	19	35	97	86	18	55	5	1	64	139	19	19	46	300	AHDC1
ENSG00000000938	0	0	0	2	2	4	0	2	0	0	0	0	0	0	0	4	FGR
ENSG00000235912	2	3	0	2	2	1	1	1	0	0	0	0	0	0	0	3	RP1-159A19.3
ENSG00000233975	0	0	0	0	0	0	0	0	0	0	0	0	0	0	0	1	RP11-288L9.1
ENSG00000126709	70	8	5	12	16	13	6	7	7	3	68	182	92	6	18	37	IFI6
ENSG00000225886	2	0	0	0	2	0	0	0	0	0	0	1	1	0	0	4	RP11-288L9.4
ENSG00000206767	0	0	0	0	0	0	0	0	0	0	0	0	0	0	0	0	RNU6-949P
ENSG00000226662	0	0	0	0	0	0	0	0	0	0	0	0	0	0	0	0	CHMP1AP1
ENSG00000207095	0	0	0	0	0	0	0	0	0	0	0	0	0	0	0	0	RNU6-424P
ENSG00000009780	41	34	9	41	96	121	21	34	1	3	25	46	5	13	22	141	FAM76A
ENSG00000231344	0	0	0	0	1	3	1	0	0	0	0	1	0	0	0	1	RP3-426I6.2
ENSG00000230833	0	0	0	0	2	0	0	0	0	0	0	0	0	0	0	1	RPEP3
ENSG00000117758	737	172	40	36	89	122	10	33	57	41	110	285	14	45	82	368	STX12
ENSG00000269971	2	3	1	0	1	1	1	0	0	0	0	0	0	0	1	5	RP3-426I6.5
ENSG00000270031	0	0	1	0	0	1	0	0	0	0	0	1	0	0	0	1	RP3-426I6.6
ENSG00000223062	0	0	0	0	0	0	0	0	0	0	0	0	0	0	0	0	RNU6-1245P
ENSG00000117751	260	98	29	176	273	281	88	160	26	20	64	204	36	43	101	279	PPP1R8
ENSG00000252947	2	0	0	0	3	1	0	3	0	0	1	1	1	0	0	7	SCARNA1
ENSG00000268552	0	0	0	0	0	0	0	0	0	0	0	0	0	0	0	0	AL109927.1
ENSG00000130775	24	6	2	47	65	89	11	29	1	0	6	10	1	1	3	21	THEMIS2
ENSG00000117748	110	74	31	216	254	387	100	238	10	18	87	150	16	56	108	245	RPA2
ENSG00000130768	23	2	0	92	89	118	37	71	1	0	15	29	3	0	1	3	SMPDL3B
ENSG00000227050	0	0	0	0	0	2	0	3	0	0	0	0	0	0	0	0	RP11-460I13.2
ENSG00000158156	90	12	5	54	89	71	17	48	5	7	22	56	7	2	7	29	XKR8
ENSG00000158161	160	126	44	179	247	379	106	183	19	26	118	185	34	40	111	435	EYA3
ENSG00000238231	0	0	0	0	0	2	0	1	0	0	0	0	0	0	0	3	RP11-460I13.6
ENSG00000240750	0	0	0	0	0	0	0	2	0	0	0	0	0	0	0	3	RN7SL559P
ENSG00000228589	4	0	0	2	0	0	1	1	0	0	0	3	0	0	2	0	SPCS2P4
ENSG00000228943	0	0	0	0	0	0	0	0	0	0	0	0	0	0	0	0	RP5-1053E7.2
ENSG00000214812	0	2	0	0	0	0	0	0	0	0	0	0	0	0	0	1	RP5-1053E7.3
ENSG00000253005	0	0	0	0	0	0	0	0	0	0	0	0	0	0	0	0	RNU6-176P
ENSG00000252429	0	0	0	0	0	0	0	0	0	0	0	0	0	0	0	0	RNU7-29P
ENSG00000169403	41	14	0	5	9	8	1	6	1	0	0	3	0	0	2	10	PTAFR
ENSG00000126698	292	155	58	280	369	412	125	266	30	36	109	268	46	80	127	402	DNAJC8
ENSG00000215902	0	0	0	0	1	3	0	3	0	0	0	0	0	0	0	4	AL353354.1
ENSG00000269804	0	0	0	0	0	0	0	0	0	0	0	0	0	0	0	0	AL353354.2
ENSG00000130770	291	116	22	161	233	247	81	164	36	35	145	336	37	39	49	247	ATPIF1
ENSG00000270605	4	9	5	2	16	10	2	4	0	0	3	7	1	1	2	20	RP5-1092A3.4
ENSG00000271398	0	0	0	0	1	0	0	0	0	0	0	2	0	0	0	5	RP5-1092A3.5
ENSG00000130766	295	109	33	59	273	155	34	143	12	14	57	128	18	20	21	259	SESN2
ENSG00000130772	60	37	6	28	55	48	15	20	6	5	14	34	9	7	15	37	MED18
ENSG00000204138	165	121	34	128	281	314	59	132	10	17	71	142	33	48	70	345	PHACTR4
ENSG00000206779	0	0	0	0	0	1	0	0	0	0	0	0	0	0	0	1	Y_RNA
ENSG00000229820	1	0	0	0	0	0	0	2	0	0	0	0	0	0	0	1	RP1-308E4.1
ENSG00000221216	1	0	0	0	0	1	0	0	0	0	0	0	0	0	0	0	RNU6ATAC27P
ENSG00000180198	264	82	25	312	383	367	133	258	4	15	59	178	21	41	60	314	RCC1
ENSG00000242125	925	571	77	780	2108	1596	337	948	59	41	448	1071	133	108	245	1403	SNHG3
ENSG00000200087	279	151	28	269	450	272	116	280	26	35	207	438	72	27	121	620	SNORA73B
ENSG00000238821	1	0	0	0	1	1	0	0	0	0	0	0	1	0	0	0	snoU13
ENSG00000231468	1	3	1	3	9	5	1	3	0	1	0	0	0	0	0	8	PRDX3P2
ENSG00000180098	93	43	12	67	113	110	28	49	5	0	35	58	15	15	27	134	TRNAU1AP
ENSG00000197989	106	120	32	124	219	201	33	98	8	4	35	61	15	17	19	165	SNHG12
ENSG00000221539	2	8	1	4	6	5	2	3	1	0	1	2	0	0	0	4	SNORD99
ENSG00000120656	72	70	14	52	126	131	22	62	4	3	51	73	5	9	32	119	TAF12
ENSG00000188060	6	2	0	23	34	41	13	19	0	0	8	7	1	7	5	24	RAB42
ENSG00000229388	1	0	0	1	2	3	0	0	0	0	1	5	0	1	1	1	RP11-442N24__B.1
ENSG00000270103	16	147	12	24	20	23	3	18	4	0	11	21	2	10	18	173	RNU11
ENSG00000162419	87	35	20	105	134	124	43	82	7	4	38	85	3	18	49	167	GMEB1
ENSG00000252777	0	0	0	0	0	0	0	0	0	0	0	0	0	0	0	0	SCARNA24
ENSG00000198492	563	380	108	582	928	1050	247	750	30	44	175	446	54	125	233	861	YTHDF2
ENSG00000116329	0	1	1	0	7	3	1	2	0	0	1	1	2	0	0	0	OPRD1
ENSG00000226852	0	1	0	6	6	9	0	2	0	0	0	0	0	0	0	1	RP1-212P9.2
ENSG00000233427	0	0	0	0	0	1	0	0	0	0	0	0	0	0	0	1	RP1-212P9.3
ENSG00000199756	0	0	0	0	0	1	0	0	0	0	0	0	0	0	0	0	Y_RNA
ENSG00000159023	381	289	117	344	749	846	158	364	15	28	145	232	56	170	221	1155	EPB41
ENSG00000225616	1	0	0	0	1	1	0	1	0	0	2	1	0	0	1	1	RP4-604A21.1
ENSG00000206704	0	0	0	0	0	0	0	0	0	0	0	0	0	0	0	0	Y_RNA
ENSG00000253304	84	3	2	16	34	35	3	17	4	4	18	25	4	1	5	11	TMEM200B
ENSG00000225750	1	0	0	1	0	1	0	2	0	0	1	2	0	0	0	1	RP11-242O24.3
ENSG00000116350	275	174	51	209	296	313	68	165	10	23	103	217	42	60	91	477	SRSF4
ENSG00000227637	1	6	2	1	2	0	0	0	0	0	0	0	1	0	0	4	RP11-242O24.5
ENSG00000116353	27	18	11	41	94	102	30	30	2	4	30	81	6	11	27	67	MECR
ENSG00000237934	2	0	0	1	2	2	0	0	0	0	0	2	0	0	0	1	RP11-467D18.2
ENSG00000060656	120	96	24	185	263	275	68	145	8	13	31	45	3	22	60	264	PTPRU
ENSG00000221550	0	0	1	0	0	0	0	0	0	0	0	0	0	0	0	0	AL645859.1
ENSG00000230523	0	0	0	0	1	0	0	0	0	0	0	0	0	2	0	3	RP3-437I16.1
ENSG00000266678	0	0	0	0	0	0	0	0	0	0	0	0	0	0	0	0	AL139151.1
ENSG00000225011	0	0	0	0	0	0	0	0	0	0	0	0	0	0	0	1	RP11-810H18.1
ENSG00000221126	0	0	0	0	0	0	0	0	0	0	0	0	0	0	0	0	AC092265.1
ENSG00000228176	0	0	0	0	0	0	0	0	0	0	0	0	0	0	0	1	RP4-656G21.1
ENSG00000222787	0	0	0	0	0	0	0	0	0	0	0	0	0	0	0	0	AL645944.1
ENSG00000270927	0	0	0	0	0	0	0	0	0	0	0	0	0	0	0	0	RP11-179G8.1
ENSG00000233399	0	0	0	0	0	0	0	0	0	0	0	0	0	0	0	1	RP11-111I12.1
ENSG00000233372	0	0	0	0	0	0	0	0	0	0	0	0	0	0	0	0	RP5-893G23.1
ENSG00000231251	0	0	0	0	0	0	0	0	0	0	0	0	0	0	0	0	RP3-357I16.1
ENSG00000236335	0	0	0	0	0	0	0	0	0	0	0	0	0	0	0	1	RP4-591L5.1
ENSG00000231949	0	0	0	0	0	0	0	0	0	0	0	0	0	0	0	0	RP4-591L5.2
ENSG00000162510	1	2	2	2	2	1	0	0	0	0	0	1	0	0	1	10	MATN1
ENSG00000186056	8	2	0	0	4	0	0	0	2	0	3	9	0	0	2	13	MATN1-AS1
ENSG00000162511	3	0	0	0	2	0	0	0	1	1	0	2	2	0	2	2	LAPTM5
ENSG00000264773	0	0	0	0	0	0	0	0	0	0	0	0	0	0	0	0	MIR4420
ENSG00000229607	0	0	0	0	0	0	0	0	0	0	0	0	0	0	0	0	RP5-1125N11.1
ENSG00000223382	0	1	0	0	0	0	0	0	0	0	0	0	1	0	0	3	RP1-65J11.1
ENSG00000222784	0	1	0	0	0	0	0	0	0	0	0	0	0	0	0	0	RN7SKP91
ENSG00000235143	0	0	0	0	0	0	0	0	0	0	0	0	0	0	0	0	RP1-65J11.5
ENSG00000162512	147	175	61	112	222	177	41	91	8	15	161	596	74	85	132	701	SDC3
ENSG00000134644	810	655	164	523	983	1154	230	496	45	53	420	917	98	191	353	1625	PUM1
ENSG00000200154	0	0	0	0	0	0	0	0	0	0	0	0	0	0	0	0	SNORD103A
ENSG00000202107	2	3	1	0	1	2	1	2	0	0	3	1	1	0	0	5	SNORD103B
ENSG00000200181	1	4	0	1	3	1	0	3	0	2	1	3	0	0	2	6	SNORD85
ENSG00000237329	2	8	1	2	5	5	0	2	0	0	2	1	1	1	2	16	RP11-201O14.1
ENSG00000232768	1	6	0	2	5	1	0	0	0	0	0	0	0	0	0	9	RP11-201O14.2
ENSG00000215900	0	4	0	0	0	0	0	0	0	0	0	0	0	0	0	19	SEPW1P
ENSG00000225142	0	0	0	0	0	0	0	0	0	0	0	0	0	0	0	0	RP11-490K7.1
ENSG00000084628	6	43	20	171	146	170	58	94	0	0	3	9	2	47	69	224	NKAIN1
ENSG00000060688	123	124	41	373	491	501	157	294	9	10	84	201	30	67	116	365	SNRNP40
ENSG00000229447	3	3	0	2	3	8	4	2	0	0	1	2	0	0	0	3	RP11-490K7.4
ENSG00000121766	118	66	13	132	235	236	59	150	9	11	59	119	17	36	58	179	ZCCHC17
ENSG00000229044	0	1	0	0	1	3	0	1	0	0	0	0	0	0	0	1	RP11-266K22.2
ENSG00000121769	58	61	3	32	33	30	14	24	8	1	25	72	10	4	9	73	FABP3
ENSG00000168528	237	38	12	50	89	80	22	41	13	20	59	177	20	7	22	127	SERINC2
ENSG00000268950	0	1	0	0	0	0	0	0	0	0	0	1	0	0	0	1	AC114494.1
ENSG00000215899	0	0	0	0	0	0	0	0	0	0	0	0	0	0	0	0	RP11-439L8.2
ENSG00000206981	0	0	0	0	0	0	0	0	0	0	0	0	0	0	0	1	RNU6-40P
ENSG00000228682	0	1	0	0	0	1	0	0	0	0	0	0	0	0	0	3	RP11-439L8.3
ENSG00000223907	2	2	0	0	0	0	0	0	0	0	0	1	1	0	0	3	RP11-439L8.4
ENSG00000229167	0	0	0	0	0	0	0	0	0	0	2	1	1	0	0	1	RP11-73M7.1
ENSG00000142910	52	1	1	19	44	32	11	20	3	0	94	192	32	0	7	5	TINAGL1
ENSG00000121764	1	2	1	2	0	1	1	0	0	0	1	6	0	0	0	1	HCRTR1
ENSG00000162517	240	54	18	105	127	144	43	86	9	17	86	181	19	34	73	180	PEF1
ENSG00000235790	0	2	0	3	1	4	0	3	0	0	3	3	0	1	4	4	RP11-73M7.6
ENSG00000264078	0	0	0	1	0	1	0	0	0	0	0	0	0	0	0	3	RP11-73M7.9
ENSG00000084636	6	11	7	47	76	101	19	45	2	2	50	416	8	20	130	35	COL16A1
ENSG00000121753	28	105	26	73	121	148	22	72	1	4	67	241	10	34	69	433	BAI2
ENSG00000266580	0	1	0	0	0	0	0	1	0	0	0	0	1	0	0	0	MIR4254
ENSG00000254545	1	1	0	0	0	0	0	0	0	0	0	1	0	0	0	1	RP11-84A19.3
ENSG00000134668	137	5	1	1	9	15	0	10	1	0	4	17	2	0	1	11	SPOCD1
ENSG00000203620	0	1	0	0	0	0	0	0	0	0	0	0	0	0	0	0	RP11-84A19.2
ENSG00000269967	1	4	0	1	2	2	0	1	0	0	1	0	1	1	3	15	RP11-84A19.4
ENSG00000184007	1227	530	150	498	713	951	202	567	75	109	338	726	95	192	259	1481	PTP4A2
ENSG00000212673	3	8	4	0	4	8	1	1	0	0	2	2	0	1	1	16	AL136115.1
ENSG00000228634	3	7	0	1	2	0	0	2	0	0	2	2	0	0	2	27	RP4-534N18.2
ENSG00000121774	447	501	141	520	891	1022	239	721	23	31	252	516	78	188	385	1238	KHDRBS1
ENSG00000203325	3	1	1	0	6	4	1	0	0	0	1	1	1	0	2	10	RP11-277A4.4
ENSG00000121775	20	25	13	50	52	59	17	40	2	1	15	37	10	9	21	108	TMEM39B
ENSG00000266203	0	0	0	0	0	0	0	0	0	0	0	0	0	0	1	0	MIR5585
ENSG00000025800	989	253	72	615	1105	1473	289	707	58	79	322	752	81	105	201	860	KPNA6
ENSG00000250135	0	0	0	0	0	0	0	0	0	0	0	0	0	0	0	0	RP4-622L5.2
ENSG00000084652	595	195	54	364	663	660	169	367	59	61	250	600	64	78	169	548	TXLNA
ENSG00000160050	17	28	5	18	20	24	6	17	2	1	27	60	6	8	19	44	CCDC28B
ENSG00000224066	1	1	1	0	4	3	0	1	0	0	1	4	0	1	0	4	RP4-622L5.7
ENSG00000160051	8	9	4	14	20	26	6	18	0	0	7	23	1	5	9	50	IQCC
ENSG00000222046	5	6	1	1	6	7	1	3	0	0	1	14	2	1	4	29	DCDC2B
ENSG00000160055	52	18	6	14	31	27	5	16	3	3	15	43	8	9	14	51	TMEM234
ENSG00000084623	611	412	112	507	839	762	207	444	43	70	278	634	79	101	187	783	EIF3I
ENSG00000220785	16	12	1	17	32	44	6	18	0	0	20	40	2	3	12	58	MTMR9LP
ENSG00000183615	0	4	0	0	4	5	3	2	0	0	1	3	0	0	0	3	FAM167B
ENSG00000182866	1	0	0	213	257	193	62	178	0	0	0	0	0	0	0	3	LCK
ENSG00000252450	0	0	0	0	0	0	0	0	0	0	0	0	0	0	0	0	Y_RNA
ENSG00000116478	368	267	69	279	440	615	112	288	17	15	148	434	67	51	136	617	HDAC1
ENSG00000175130	638	491	197	946	1019	968	335	627	15	25	272	739	80	220	290	1755	MARCKSL1
ENSG00000233775	0	0	0	0	1	1	0	0	0	0	0	0	0	0	0	2	RP4-811H24.9
ENSG00000162526	2	1	1	1	4	3	0	3	0	0	2	10	1	1	0	12	TSSK3
ENSG00000225828	7	8	5	1	4	6	0	2	0	0	3	6	2	2	5	33	FAM229A
ENSG00000160058	608	187	30	132	256	292	59	176	26	43	134	330	45	61	86	626	BSDC1
ENSG00000224333	0	0	0	0	1	0	0	0	0	0	1	0	0	1	0	1	GAPDHP20
ENSG00000270850	0	0	0	0	0	0	0	0	0	0	0	0	0	0	1	0	RP11-395N6.4
ENSG00000229259	0	0	0	2	2	5	1	2	0	0	0	0	0	0	0	0	LRRC37A12P
ENSG00000263529	0	0	0	0	0	0	0	0	0	0	0	0	0	0	0	0	RN7SL122P
ENSG00000254553	0	0	0	0	0	0	0	0	0	0	0	0	0	0	0	0	RP1-27O5.3
ENSG00000273274	0	18	5	29	65	88	14	33	0	1	8	7	0	4	12	84	ZBTB8B
ENSG00000160062	44	13	8	42	75	104	15	49	2	1	19	55	7	22	21	71	ZBTB8A
ENSG00000176261	84	21	11	71	121	124	34	72	8	5	35	95	7	27	27	123	ZBTB8OS
ENSG00000200591	1	2	0	1	3	4	0	0	0	0	0	1	0	0	0	1	Y_RNA
ENSG00000162521	371	373	152	662	931	1100	284	660	33	32	378	881	113	265	505	1586	RBBP4
ENSG00000162520	6	0	0	0	0	1	0	0	0	1	4	33	0	0	0	5	SYNC
ENSG00000224409	0	1	0	0	0	0	0	0	0	0	0	0	0	0	0	0	RP11-114B7.6
ENSG00000162522	460	108	29	176	287	334	64	233	27	35	168	495	58	14	26	300	KIAA1522
ENSG00000134684	235	207	69	640	1001	955	249	635	24	43	123	303	29	58	101	648	YARS
ENSG00000116497	143	132	32	209	370	481	105	223	13	11	76	183	26	56	127	436	S100PBP
ENSG00000160097	6	54	12	8	10	8	3	4	0	0	1	16	0	51	66	264	FNDC5
ENSG00000121905	1	2	1	1	1	7	0	0	0	0	1	3	0	5	0	10	HPCA
ENSG00000121900	26	1	0	6	26	31	8	15	3	4	16	37	3	2	11	7	TMEM54
ENSG00000221423	0	0	0	0	0	0	0	0	0	0	0	0	0	0	1	1	AL031602.1
ENSG00000116514	147	48	14	26	42	50	7	26	8	14	24	44	7	15	21	88	RNF19B
ENSG00000267885	1	0	0	0	0	2	0	0	0	0	0	1	0	0	0	0	FKSG48
ENSG00000217644	2	1	0	0	0	0	0	0	0	0	0	0	0	0	0	1	RP4-803A2.1
ENSG00000239670	0	0	0	0	0	0	0	0	0	0	0	2	0	0	0	2	RP4-803A2.2
ENSG00000236065	4	2	1	0	3	4	0	2	0	0	3	0	0	0	1	8	RP1-117O3.2
ENSG00000004455	433	116	36	293	436	434	102	266	49	55	221	469	67	50	172	464	AK2
ENSG00000142920	18	26	13	3	3	2	0	0	2	3	6	31	5	5	10	77	ADC
ENSG00000116525	16	17	8	27	35	36	7	17	2	1	5	35	4	7	3	68	TRIM62
ENSG00000160094	29	24	7	30	40	47	9	20	1	4	18	112	8	20	30	96	ZNF362
ENSG00000270115	0	1	0	0	2	3	1	0	0	0	0	1	0	1	1	2	RP11-415J8.7
ENSG00000256142	0	0	0	0	0	0	0	0	0	0	0	0	0	0	0	0	AL513327.1
ENSG00000184389	0	0	0	0	0	1	0	0	0	0	0	0	0	1	0	4	A3GALT2
ENSG00000225313	5	1	2	0	0	0	0	0	0	0	2	6	1	1	4	6	RP11-415J8.3
ENSG00000134686	419	153	42	19	22	28	12	30	15	17	226	588	70	90	159	660	PHC2
ENSG00000266239	0	0	0	0	0	0	0	0	0	0	0	0	0	0	2	0	MIR3605
ENSG00000222112	4	1	3	0	0	0	0	0	0	0	2	1	0	0	1	3	RN7SKP16
ENSG00000233246	0	0	0	0	0	0	0	0	0	0	1	0	0	1	1	3	RP11-415J8.5
ENSG00000221225	0	0	0	0	0	0	0	0	0	0	0	0	0	0	0	0	AL138837.1
ENSG00000234512	0	0	0	0	0	0	0	0	0	0	0	0	0	0	0	2	TLR12P
ENSG00000121903	40	24	8	17	21	49	13	15	6	2	20	38	11	7	26	101	ZSCAN20
ENSG00000235907	0	0	0	0	0	0	0	0	0	0	0	0	0	1	1	3	RP4-580O19.2
ENSG00000121904	5	27	4	87	2	163	41	99	0	1	3	17	0	2	9	148	CSMD2
ENSG00000227000	0	0	0	0	0	4	0	1	0	0	0	0	0	0	0	1	HSPD1P14
ENSG00000176256	0	0	0	0	0	1	0	2	0	0	0	2	0	0	0	2	HMGB4
ENSG00000231163	0	1	0	0	0	3	3	7	0	0	0	0	0	1	0	1	RP5-1007G16.1
ENSG00000201148	0	0	0	0	0	0	0	1	0	0	0	0	0	1	0	0	RNA5SP42
ENSG00000142698	0	1	0	28	1	26	7	16	0	0	0	1	0	0	0	2	C1orf94
ENSG00000221053	0	0	0	0	0	0	0	0	0	0	0	0	0	0	0	0	AC115286.1
ENSG00000270241	0	0	0	0	0	0	0	0	0	0	0	0	0	0	0	0	RP4-657M3.2
ENSG00000207941	0	0	0	0	0	0	0	0	0	0	0	0	0	0	0	0	MIR552
ENSG00000163866	188	22	8	75	121	127	39	91	6	14	40	99	12	21	32	86	SMIM12
ENSG00000189280	0	0	0	1	5	2	0	0	0	0	0	1	1	0	0	3	GJB5
ENSG00000189433	1	0	1	0	1	0	0	0	0	0	0	1	0	0	0	2	GJB4
ENSG00000255811	0	0	0	0	0	0	0	0	0	0	0	1	0	0	0	1	RP1-34M23.5
ENSG00000216162	0	0	0	0	0	0	0	0	0	0	0	0	0	0	0	3	AL121988.1
ENSG00000188910	9	0	0	3	2	4	0	2	0	0	3	6	0	1	0	2	GJB3
ENSG00000187513	0	2	4	1	19	4	0	0	0	0	3	0	3	2	0	9	GJA4
ENSG00000230163	2	2	3	5	4	5	2	2	0	1	2	2	0	2	0	5	RP5-997D16.2
ENSG00000116544	61	4	4	30	34	50	14	36	2	3	5	3	0	3	5	17	DLGAP3
ENSG00000252728	0	0	0	0	0	0	0	0	0	0	0	0	0	0	0	0	SNORD112
ENSG00000241014	20	2	1	0	8	11	0	0	2	0	17	28	3	3	4	20	RP11-244H3.1
ENSG00000271741	0	0	0	0	0	0	0	0	0	0	0	0	0	0	0	0	RP11-244H3.4
ENSG00000243749	4	1	0	3	0	2	0	0	0	0	0	2	0	0	1	2	ZMYM6NB
ENSG00000163867	84	44	12	49	77	99	22	42	5	4	22	57	12	11	26	89	ZMYM6
ENSG00000233940	0	0	0	0	0	0	0	0	0	0	0	0	0	0	0	0	RP11-248I9.2
ENSG00000197056	176	45	20	173	487	478	77	202	8	15	83	173	22	34	97	335	ZMYM1
ENSG00000228348	0	0	0	0	2	0	0	0	0	0	0	1	0	0	1	1	EFCAB14P1
ENSG00000116560	1010	695	256	2041	2549	3184	945	2034	47	55	294	920	107	360	640	3136	SFPQ
ENSG00000201868	0	0	0	0	0	0	0	0	0	0	0	0	0	0	0	0	Y_RNA
ENSG00000263591	0	0	0	0	0	0	0	0	0	0	0	0	0	0	0	0	RN7SL136P
ENSG00000146463	245	224	107	437	677	652	203	429	30	29	198	356	53	146	236	1140	ZMYM4
ENSG00000240374	0	0	0	1	0	4	0	1	0	0	0	0	0	0	0	1	RN7SL503P
ENSG00000201542	0	0	1	0	0	1	0	0	0	0	0	0	0	0	0	1	SNORA62
ENSG00000229994	7	8	1	8	14	10	2	5	0	1	4	10	0	6	4	26	RPL5P4
ENSG00000227409	0	0	0	0	1	5	0	2	0	0	0	0	0	1	1	3	ZMYM4-AS1
ENSG00000202129	0	0	0	0	0	0	0	0	0	0	0	0	0	0	0	0	RNY5P1
ENSG00000142687	658	183	45	171	552	578	105	234	65	56	152	400	32	52	115	580	KIAA0319L
ENSG00000236274	1	0	1	0	3	1	0	1	0	0	0	0	0	1	0	3	RP4-728D4.3
ENSG00000020129	144	45	12	187	235	258	94	126	6	10	46	170	4	21	33	165	NCDN
ENSG00000239636	2	0	0	0	3	1	0	0	0	0	1	0	0	0	1	11	RP4-728D4.2
ENSG00000116819	4	6	3	1	3	3	0	1	0	0	5	10	0	2	2	15	TFAP2E
ENSG00000126067	290	117	64	253	382	506	109	257	22	26	138	333	25	61	105	370	PSMB2
ENSG00000239859	0	0	0	0	0	0	0	0	0	0	0	0	0	0	0	1	RN7SL281P
ENSG00000142686	37	13	6	58	66	74	24	41	1	2	18	56	2	11	16	29	C1orf216
ENSG00000092853	16	38	34	144	190	291	71	115	1	2	11	37	1	27	52	145	CLSPN
ENSG00000232335	0	0	0	0	1	3	0	0	0	0	0	2	0	1	0	1	RP11-435D7.3
ENSG00000134698	213	97	17	39	114	168	25	71	6	10	50	138	15	50	72	393	AGO4
ENSG00000092847	480	510	159	564	1139	1410	283	730	37	41	187	518	60	259	343	1608	AGO1
ENSG00000271164	0	0	0	0	0	1	0	0	0	0	0	0	0	0	0	0	RP4-789D17.4
ENSG00000271914	5	4	0	0	1	5	2	2	0	0	1	0	0	0	4	12	RP4-789D17.5
ENSG00000126070	223	267	74	69	283	179	33	87	16	19	204	429	64	86	187	1027	AGO3
ENSG00000271554	0	1	0	1	2	2	2	1	0	0	1	0	0	1	1	5	RP4-665N4.8
ENSG00000232862	1	0	0	0	1	0	0	0	0	0	0	1	0	0	0	1	RP4-665N4.4
ENSG00000092850	2	9	3	3	6	2	0	0	0	0	3	7	1	3	8	50	TEKT2
ENSG00000116863	146	41	9	60	129	103	19	57	5	9	42	124	9	18	42	105	ADPRHL2
ENSG00000171812	5	3	0	14	21	47	4	18	1	0	38	87	2	7	13	8	COL8A2
ENSG00000054116	226	39	14	69	144	173	33	67	18	30	70	173	16	18	45	90	TRAPPC3
ENSG00000116871	333	196	45	108	196	142	43	86	9	9	82	277	33	41	68	433	MAP7D1
ENSG00000264592	0	0	0	0	0	0	0	0	0	0	0	0	0	0	0	4	RN7SL131P
ENSG00000054118	1151	424	99	929	1154	1615	371	781	59	80	259	871	84	186	299	1000	THRAP3
ENSG00000231849	1	0	0	0	0	2	0	0	0	0	1	2	0	0	0	3	UBE2V2P4
ENSG00000214193	88	72	15	20	48	46	15	16	11	9	19	58	12	3	24	243	SH3D21
ENSG00000142694	34	9	3	4	19	15	1	4	2	0	19	70	4	4	12	22	EVA1B
ENSG00000116883	11	8	3	8	20	22	2	5	1	0	7	10	1	4	5	49	RP11-268J15.5
ENSG00000196182	216	128	31	77	149	115	33	77	16	33	55	185	13	25	59	344	STK40
ENSG00000181817	20	20	5	19	18	17	9	20	2	2	7	19	2	1	7	38	LSM10
ENSG00000222821	0	0	0	0	1	1	0	0	0	0	1	0	0	0	0	1	RNU4-27P
ENSG00000116885	12	12	11	7	9	14	6	3	1	0	16	27	4	5	12	119	OSCP1
ENSG00000201448	0	0	1	0	0	0	0	1	0	0	0	1	0	0	0	4	SNORA63
ENSG00000116898	248	51	19	216	283	219	82	179	35	67	88	163	29	28	52	148	MRPS15
ENSG00000119535	10	3	1	0	1	0	0	1	5	6	22	22	3	0	0	6	CSF3R
ENSG00000230214	0	0	0	0	0	0	0	0	0	0	0	0	0	0	0	0	FTLP18
ENSG00000234481	0	0	0	0	0	0	0	0	0	0	0	0	0	0	0	0	RP4-614N24.1
ENSG00000163873	0	21	10	19	16	23	7	21	0	0	1	0	0	32	19	200	GRIK3
ENSG00000264698	0	0	0	0	0	0	0	0	0	0	0	0	0	0	0	0	MIR4255
ENSG00000207328	0	0	0	0	0	0	0	0	0	0	0	0	0	0	0	0	RNU6-636P
ENSG00000223944	0	0	0	0	0	0	0	0	0	0	0	0	0	0	0	0	RP5-1180C18.1
ENSG00000252368	0	0	0	0	0	0	0	0	0	0	0	0	0	0	0	0	RNA5SP43
ENSG00000230451	0	0	0	0	0	0	0	0	0	0	0	0	0	0	0	0	RPS29P6
ENSG00000233621	24	1	0	4	1	1	0	0	4	3	7	5	0	0	1	4	LINC01137
ENSG00000163874	315	28	2	20	44	44	10	23	5	14	35	56	3	2	8	81	ZC3H12A
ENSG00000163875	159	110	30	94	128	139	34	110	8	18	57	155	15	67	92	403	MEAF6
ENSG00000263675	0	0	1	0	2	0	0	0	0	0	0	1	0	0	0	3	MIR5581
ENSG00000163877	96	69	8	61	76	118	15	55	1	9	29	96	16	14	27	142	SNIP1
ENSG00000232273	2	1	1	0	0	1	0	0	0	0	0	2	1	1	1	11	FTH1P1
ENSG00000237749	0	2	0	1	1	1	0	0	0	0	1	0	0	0	1	2	RP3-423B22.5
ENSG00000163879	91	59	31	33	50	67	15	23	5	7	63	112	18	33	49	296	DNALI1
ENSG00000134697	195	240	66	352	539	646	127	436	24	26	137	251	45	48	90	510	GNL2
ENSG00000169218	0	30	14	0	2	3	0	2	0	0	0	0	0	4	18	154	RSPO1
ENSG00000116922	77	81	16	120	224	192	36	131	5	7	43	117	10	17	45	192	C1orf109
ENSG00000134690	17	110	19	131	301	259	72	138	0	3	31	54	27	42	71	263	CDCA8
ENSG00000183317	11	0	0	7	22	24	0	2	0	0	0	1	0	3	0	20	EPHA10
ENSG00000200421	0	0	0	0	0	0	0	0	0	0	0	0	0	0	0	0	Y_RNA
ENSG00000238871	0	0	0	0	0	0	0	0	0	0	0	0	0	0	0	1	snoU13
ENSG00000214141	0	0	1	0	0	0	0	0	0	0	0	0	0	0	0	0	ACTN4P2
ENSG00000227416	0	0	0	0	0	0	0	0	0	0	0	0	0	0	0	0	RP11-109P14.2
ENSG00000185090	28	8	5	7	13	29	4	20	0	3	2	9	2	3	3	20	MANEAL
ENSG00000233728	0	0	0	0	0	0	0	0	0	0	0	0	0	0	0	0	RP11-109P14.9
ENSG00000196449	90	91	12	76	98	124	21	58	5	7	27	79	2	7	19	102	YRDC
ENSG00000197982	131	33	13	64	101	83	22	49	9	10	40	124	3	12	23	83	C1orf122
ENSG00000188786	73	74	20	49	97	132	24	64	8	12	37	65	4	17	25	198	MTF1
ENSG00000230610	0	0	0	1	0	0	0	0	0	0	0	0	0	0	0	0	AL929472.1
ENSG00000235673	0	0	0	0	0	1	0	0	0	0	0	0	0	0	0	0	RP11-109P14.8
ENSG00000230955	0	0	0	0	0	0	0	0	0	0	0	0	0	0	0	0	RP11-109P14.10
ENSG00000204084	100	68	17	105	220	288	57	148	9	4	66	113	14	20	45	211	INPP5B
ENSG00000252448	1	0	0	0	0	0	0	0	0	0	0	0	0	0	0	0	SNORA63
ENSG00000222282	0	0	0	0	0	0	0	0	0	0	0	0	0	0	0	0	RNU6-584P
ENSG00000183431	302	186	96	549	685	897	244	447	34	42	134	377	43	93	140	573	SF3A3
ENSG00000212541	2	0	0	0	2	1	0	0	0	0	1	2	0	1	0	2	RNU6-510P
ENSG00000183386	74	14	4	36	88	86	8	28	1	3	23	67	18	6	25	41	FHL3
ENSG00000183520	99	97	13	165	237	305	78	195	7	18	60	145	16	27	64	234	UTP11L
ENSG00000185668	3	20	3	15	68	36	8	11	0	0	4	17	1	5	7	55	POU3F1
ENSG00000224592	0	2	0	2	2	0	0	2	0	0	0	0	0	0	0	4	RP5-884C9.2
ENSG00000223589	0	0	0	0	1	0	0	1	0	0	0	0	0	0	0	0	RP5-884C9.3
ENSG00000265596	0	0	0	0	0	0	0	0	0	0	0	0	0	0	0	2	MIR3659
ENSG00000237290	0	1	0	0	2	0	0	1	0	0	0	1	0	0	1	1	RP11-214L19.1
ENSG00000200796	0	0	0	0	0	1	0	0	0	0	0	0	0	0	0	0	RNU6-753P
ENSG00000238063	0	1	0	0	0	0	0	0	0	0	0	0	0	0	0	4	RP11-329N22.1
ENSG00000215895	2	1	2	1	0	1	0	2	0	0	0	0	0	1	0	2	RP11-334L9.1
ENSG00000116954	255	143	24	21	89	66	20	66	13	11	37	77	8	16	23	169	RRAGC
ENSG00000228436	5	5	2	1	5	4	1	0	0	1	2	0	0	1	2	6	RP5-864K19.4
ENSG00000214114	55	15	11	63	96	137	31	61	5	4	31	63	6	8	16	59	MYCBP
ENSG00000131233	0	0	0	0	1	1	0	0	0	1	0	1	0	0	1	0	GJA9
ENSG00000158315	5	0	1	3	1	4	0	0	0	0	1	2	0	2	0	8	RHBDL2
ENSG00000199963	0	0	0	0	0	0	0	0	0	0	1	0	0	0	0	0	RNU6-605P
ENSG00000207466	0	0	0	0	0	0	0	0	0	0	0	0	0	0	0	0	Y_RNA
ENSG00000235549	0	0	0	0	0	0	0	0	0	0	0	0	0	0	0	3	RP11-781D11.1
ENSG00000174574	877	345	83	1077	1646	2241	521	1336	45	62	216	461	99	86	133	955	AKIRIN1
ENSG00000168653	306	127	47	413	492	841	219	407	20	25	176	431	62	70	123	286	NDUFS5
ENSG00000127603	3673	821	315	1189	2235	2616	549	1728	173	192	631	1461	178	435	579	3146	MACF1
ENSG00000206654	0	1	0	1	0	1	0	0	0	0	1	0	0	0	1	1	RNU6-608P
ENSG00000222378	0	0	0	0	1	1	1	1	0	1	0	2	0	1	0	3	RNA5SP44
ENSG00000270040	2	1	0	0	0	0	0	1	0	0	0	0	1	0	0	2	RP11-416A14.1
ENSG00000226438	0	1	0	0	1	0	1	2	0	0	0	0	0	0	1	0	RP11-420K8.1
ENSG00000217897	0	0	0	0	2	0	0	0	0	0	0	0	0	0	1	5	HSPE1P8
ENSG00000255103	109	44	12	158	267	240	55	144	7	6	43	163	24	28	45	237	KIAA0754
ENSG00000183682	25	2	2	0	5	1	0	2	2	1	2	1	0	0	0	4	BMP8A
ENSG00000237624	5	1	1	2	7	4	0	3	1	0	1	0	0	0	0	3	OXCT2P1
ENSG00000182109	35	7	4	4	15	3	1	6	3	2	2	10	0	3	3	56	RP11-69E11.4
ENSG00000243970	3	7	1	0	4	1	0	2	1	0	3	3	0	2	3	31	PPIEL
ENSG00000090621	585	201	70	577	1089	1083	196	576	37	27	337	641	79	80	139	642	PABPC4
ENSG00000228060	8	1	0	10	19	24	0	3	0	0	4	2	2	0	0	7	RP11-69E11.8
ENSG00000201457	4	1	0	2	5	7	2	2	0	0	1	3	1	0	0	3	SNORA55
ENSG00000163909	5	7	1	24	41	32	2	13	1	1	3	3	0	12	17	28	HEYL
ENSG00000225903	0	0	0	0	0	0	0	0	0	0	0	0	0	0	0	3	RP1-144F13.3
ENSG00000116981	0	0	0	0	0	0	0	0	0	0	1	4	0	0	0	1	NT5C1A
ENSG00000116983	0	11	3	16	29	17	2	27	0	0	3	0	1	10	2	20	HPCAL4
ENSG00000084072	102	93	26	56	137	130	24	58	10	17	59	110	11	23	49	173	PPIE
ENSG00000225333	0	0	0	0	0	0	0	0	0	0	0	0	0	0	0	0	RP1-144F13.4
ENSG00000252413	0	0	0	0	0	0	0	0	0	0	0	0	0	0	0	0	RNU7-121P
ENSG00000116985	207	5	1	0	9	12	3	8	15	38	3	6	3	0	2	26	BMP8B
ENSG00000198754	9	2	0	2	2	1	0	0	1	0	0	2	0	0	0	5	OXCT2
ENSG00000261798	1	0	0	0	0	0	0	0	0	0	0	0	0	0	0	1	RP1-118J21.25
ENSG00000229213	0	0	0	0	0	0	0	0	0	0	0	0	0	0	0	0	RP1-118J21.24
ENSG00000043514	88	109	23	109	185	160	43	63	2	7	58	117	16	30	51	310	TRIT1
ENSG00000202222	1	3	2	1	2	1	1	1	0	0	1	0	0	0	2	9	Y_RNA
ENSG00000116990	18	46	22	60	145	95	15	48	1	3	12	48	3	45	52	322	MYCL
ENSG00000236546	0	1	0	0	0	0	0	2	0	0	0	1	0	0	0	3	RP1-118J21.5
ENSG00000207356	0	0	0	0	0	0	0	0	0	0	0	0	0	0	0	0	Y_RNA
ENSG00000168389	4	39	12	52	139	104	13	66	1	0	11	3	0	6	13	106	MFSD2A
ENSG00000228477	0	4	1	5	3	0	0	5	0	0	2	3	0	1	1	13	RP3-342P20.2
ENSG00000131236	2063	378	122	773	1235	1270	336	728	132	130	333	852	122	151	258	980	CAP1
ENSG00000131238	152	135	47	439	536	607	201	398	15	28	216	403	31	79	148	469	PPT1
ENSG00000226745	0	0	0	0	0	0	0	0	0	0	0	0	0	0	0	0	RP11-115D7.3
ENSG00000117000	273	242	68	203	403	501	74	199	15	23	135	340	83	101	221	1260	RLF
ENSG00000207508	0	0	0	0	0	0	0	0	0	0	3	0	0	0	0	5	RNU6-1237P
ENSG00000188800	0	1	0	0	0	0	0	0	0	0	0	0	0	0	0	3	TMCO2
ENSG00000259943	30	16	2	17	13	19	1	12	3	4	22	53	5	23	28	59	RP1-39G22.7
ENSG00000084073	348	62	23	270	279	527	145	286	21	42	73	242	11	27	44	194	ZMPSTE24
ENSG00000231296	0	3	0	0	0	2	0	0	0	0	2	2	0	1	1	4	RP1-39G22.4
ENSG00000049089	7	11	5	4	21	30	2	10	1	0	69	85	9	3	18	58	COL9A2
ENSG00000227311	1	0	0	1	0	0	0	0	0	0	0	1	0	0	0	0	RP1-228H13.1
ENSG00000084070	92	44	8	10	27	28	8	19	11	19	126	189	16	27	32	110	SMAP2
ENSG00000213172	0	0	0	0	0	0	0	0	0	0	0	0	0	0	0	0	RP1-228H13.2
ENSG00000187801	9	13	2	30	81	85	13	35	0	0	14	17	3	7	19	78	ZFP69B
ENSG00000260920	3	5	5	21	64	34	12	26	0	1	11	17	3	13	7	40	RP1-228H13.5
ENSG00000187815	18	5	8	16	41	50	4	34	3	0	2	25	1	9	11	56	ZFP69
ENSG00000238287	2	1	0	3	3	1	0	1	0	0	2	1	0	0	0	1	RP11-656D10.3
ENSG00000164002	30	8	3	12	24	34	6	16	1	1	5	16	0	5	5	34	EXO5
ENSG00000227278	0	1	0	0	0	0	0	0	0	0	0	0	0	0	0	0	RP11-656D10.5
ENSG00000238186	2	2	0	0	2	0	0	2	0	0	1	1	1	0	0	2	RP11-656D10.6
ENSG00000117010	15	12	5	14	28	51	10	13	3	1	36	27	8	2	5	17	ZNF684
ENSG00000236505	0	0	0	0	1	0	0	0	0	0	0	0	0	0	0	1	RP1-63P18.2
ENSG00000233910	0	0	0	0	0	0	0	0	0	0	0	0	0	0	0	0	GTF2F2P2
ENSG00000117016	56	120	54	103	429	333	64	145	3	3	16	54	2	90	133	667	RIMS3
ENSG00000237899	0	2	0	0	1	0	0	0	0	0	0	0	0	0	0	0	RP4-739H11.3
ENSG00000272145	8	9	4	9	20	32	6	8	1	0	3	8	2	3	8	25	NFYC-AS1
ENSG00000066136	62	56	25	101	138	114	40	85	2	7	46	150	8	23	62	213	NFYC
ENSG00000198974	0	0	0	0	0	0	0	0	0	0	1	0	0	0	0	1	MIR30E
ENSG00000207962	0	0	0	1	0	0	0	0	0	0	0	0	0	0	0	0	MIR30C1
ENSG00000117013	1	11	2	3	25	19	3	5	0	0	2	3	0	1	2	19	KCNQ4
ENSG00000264582	0	0	0	0	1	0	0	0	0	0	0	0	0	0	0	0	RN7SL326P
ENSG00000179862	6	4	0	11	10	16	1	2	1	0	6	11	0	3	1	5	CITED4
ENSG00000229528	0	0	0	0	0	0	0	0	0	0	0	0	0	0	0	0	RP5-1066H13.4
ENSG00000228940	0	0	0	0	0	0	0	0	0	0	0	0	0	0	0	0	RP11-348A7.1
ENSG00000233118	0	0	0	0	0	0	0	0	0	0	0	0	0	0	0	0	UBE2V1P8
ENSG00000171793	156	64	24	292	356	391	129	296	10	18	30	126	21	57	88	316	CTPS1
ENSG00000171790	9	4	1	7	19	20	0	13	0	0	9	8	1	3	1	39	SLFNL1
ENSG00000010803	340	63	33	48	90	119	10	50	12	15	56	134	18	34	56	338	SCMH1
ENSG00000215893	0	0	0	0	0	0	0	1	0	0	0	1	0	0	0	2	RP4-635E8.1
ENSG00000235358	2	0	1	1	1	0	0	0	0	0	0	1	0	0	0	0	RP11-399E6.1
ENSG00000213987	0	1	0	0	0	0	0	0	0	0	0	0	0	0	0	8	RP11-399E6.2
ENSG00000204060	0	6	1	1	6	2	1	0	0	0	7	10	0	2	1	13	FOXO6
ENSG00000229901	0	0	0	0	1	0	0	0	0	0	1	3	0	0	0	0	RP11-399E6.4
ENSG00000252563	0	0	0	0	0	0	0	0	0	0	0	0	0	0	0	0	RNA5SP45
ENSG00000127129	0	1	0	1	1	0	0	0	0	0	0	0	0	0	0	1	EDN2
ENSG00000127124	29	27	8	2	6	3	0	1	3	2	16	31	5	1	3	33	HIVEP3
ENSG00000230881	0	1	0	0	0	0	0	0	0	0	0	0	0	0	0	0	RP11-486B10.3
ENSG00000230638	0	1	0	1	0	0	0	0	0	0	0	0	1	1	0	1	RP11-486B10.4
ENSG00000264896	0	0	0	0	0	0	0	0	0	0	0	0	0	0	0	1	AL451006.1
ENSG00000227538	0	0	0	0	0	0	0	0	0	0	0	0	0	0	0	1	HNRNPFP1
ENSG00000228776	0	0	0	0	0	0	0	0	0	0	0	0	0	0	0	0	RP11-319C21.1
ENSG00000044012	0	0	0	0	0	0	0	0	0	0	0	4	0	0	0	1	GUCA2B
ENSG00000197273	6	0	0	0	0	0	0	0	4	0	0	0	0	0	0	0	GUCA2A
ENSG00000198815	477	312	45	231	425	489	115	207	34	23	137	330	67	90	132	770	FOXJ3
ENSG00000227527	3	1	0	0	0	4	0	0	0	0	1	0	0	0	0	3	RP11-223A3.1
ENSG00000177181	12	13	5	50	36	126	12	32	2	5	14	16	4	11	5	53	RIMKLA
ENSG00000235002	0	0	0	0	0	0	0	0	0	0	0	0	0	0	0	0	RP11-157D18.2
ENSG00000066185	0	4	1	1	2	6	0	2	0	3	2	5	0	0	1	23	ZMYND12
ENSG00000127125	230	18	11	41	91	101	30	51	28	44	71	156	15	9	19	91	PPCS
ENSG00000186409	11	30	8	1	8	6	0	3	1	1	9	13	5	5	7	110	CCDC30
ENSG00000230116	0	0	0	0	0	0	0	0	0	1	0	0	0	0	0	3	RP11-163G10.2
ENSG00000236876	1	1	0	2	2	2	1	0	0	0	1	3	0	0	0	3	TMSB4XP1
ENSG00000200254	0	0	0	0	0	0	0	0	0	0	0	0	0	0	0	2	RNU6-536P
ENSG00000236180	0	1	0	0	0	1	0	0	0	0	0	0	0	0	0	0	RP11-163G10.4
ENSG00000171960	85	45	16	86	151	143	43	84	4	6	38	66	11	23	30	139	PPIH
ENSG00000234917	1	1	0	2	3	1	1	2	0	0	1	4	0	1	1	10	RP5-994D16.3
ENSG00000065978	1646	1451	491	1946	2961	3063	854	1828	91	116	630	1454	239	538	814	4125	YBX1
ENSG00000164007	100	5	2	17	38	33	2	21	10	23	6	14	1	1	2	21	CLDN19
ENSG00000117385	474	107	23	97	246	221	38	111	19	26	254	518	61	23	80	317	LEPRE1
ENSG00000164008	52	26	8	18	40	29	12	20	10	9	19	41	5	3	18	100	C1orf50
ENSG00000228452	10	2	4	3	6	8	1	5	0	3	3	6	1	4	2	15	RP5-994D16.9
ENSG00000177868	53	36	10	37	63	59	14	34	1	5	26	66	7	12	41	115	CCDC23
ENSG00000164010	32	12	5	7	25	31	4	15	0	5	17	63	2	3	7	42	ERMAP
ENSG00000228192	2	1	0	3	6	5	2	3	0	0	2	5	1	0	1	11	RP11-342M1.3
ENSG00000164011	26	12	7	39	79	78	22	51	3	3	17	29	3	9	17	43	ZNF691
ENSG00000233708	1	0	0	0	0	0	0	0	0	0	0	0	0	0	0	3	RP11-342M1.7
ENSG00000237090	0	0	1	0	0	0	0	0	0	0	0	1	0	0	0	1	RP11-342M1.6
ENSG00000225099	1	0	1	1	0	0	1	0	0	0	0	0	0	0	0	0	ATP6V1E1P1
ENSG00000117394	195	419	138	592	1296	1060	285	740	4	11	98	463	361	130	287	3372	SLC2A1
ENSG00000227533	5	21	5	15	34	24	6	7	0	0	6	10	5	6	11	152	SLC2A1-AS1
ENSG00000207256	0	0	0	0	0	0	0	0	0	0	1	0	0	0	1	1	RNU6-880P
ENSG00000252803	0	1	0	0	0	0	0	0	0	0	0	0	0	0	0	0	RNU6-870P
ENSG00000186973	0	2	1	0	1	2	0	0	0	0	0	3	0	0	0	12	FAM183A
ENSG00000117395	107	66	17	247	213	221	82	204	9	18	54	138	14	30	44	150	EBNA1BP2
ENSG00000243710	2	5	3	1	3	2	1	1	0	0	4	0	0	1	2	25	WDR65
ENSG00000199240	0	0	0	0	0	0	0	0	0	0	0	0	0	0	0	0	RNA5SP46
ENSG00000179178	43	3	0	59	67	95	24	40	7	13	0	1	0	0	0	5	TMEM125
ENSG00000253313	103	1	0	24	16	22	6	10	8	16	16	68	1	0	0	4	C1orf210
ENSG00000066056	2	20	4	19	25	19	3	9	0	0	3	13	3	4	4	61	TIE1
ENSG00000117400	1	0	0	0	0	0	0	0	0	0	0	1	0	1	0	1	MPL
ENSG00000234694	0	1	0	2	1	3	0	1	1	1	0	1	0	0	0	7	RP1-92O14.3
ENSG00000117399	50	297	92	501	778	607	188	422	2	2	52	99	39	100	163	711	CDC20
ENSG00000066322	344	39	6	41	57	71	22	41	22	37	61	183	20	6	11	60	ELOVL1
ENSG00000159479	168	80	22	47	70	91	21	67	13	23	66	136	31	11	34	149	MED8
ENSG00000229431	5	6	0	0	0	3	0	0	0	0	1	2	0	0	2	7	RP1-92O14.6
ENSG00000198198	191	71	39	51	113	91	12	30	14	11	125	288	31	29	78	380	SZT2
ENSG00000229372	0	0	0	0	0	0	0	0	0	1	0	0	0	0	0	1	SZT2-AS1
ENSG00000178922	37	6	1	6	13	10	2	5	4	2	7	19	1	2	4	22	HYI
ENSG00000229348	0	0	0	1	0	0	0	0	0	0	0	0	0	0	0	2	HYI-AS1
ENSG00000142949	2039	447	121	666	1291	1298	319	749	74	75	508	1113	129	148	275	1909	PTPRF
ENSG00000066135	205	112	33	281	467	623	137	330	12	22	64	223	16	43	97	490	KDM4A
ENSG00000236200	1	3	2	5	16	10	2	4	0	1	4	8	0	2	2	24	KDM4A-AS1
ENSG00000126091	15	26	7	3	37	25	3	5	1	1	18	54	6	16	24	103	ST3GAL3
ENSG00000229444	0	2	0	0	0	1	0	0	0	0	0	0	0	0	3	4	RP11-184I16.4
ENSG00000252201	0	0	0	0	0	0	0	0	0	0	0	0	0	0	0	1	RNU6-1058P
ENSG00000233674	0	0	0	0	0	0	0	0	0	0	0	0	0	0	0	3	RP11-184I16.3
ENSG00000224751	0	0	0	0	0	0	1	0	0	0	0	2	0	1	0	5	SHMT1P1
ENSG00000117407	3	2	0	21	30	25	9	13	0	0	2	6	0	0	0	10	ARTN
ENSG00000237950	0	0	0	0	1	1	0	0	0	0	1	0	0	1	0	3	RP11-7O11.3
ENSG00000117408	190	49	19	89	147	168	33	80	10	14	35	119	5	29	29	200	IPO13
ENSG00000132768	50	39	8	205	289	239	74	177	3	4	38	95	10	18	22	89	DPH2
ENSG00000117410	420	218	38	169	276	193	87	176	16	48	84	185	20	38	67	325	ATP6V0B
ENSG00000117411	157	53	25	157	261	226	73	168	16	16	53	196	15	42	74	251	B4GALT2
ENSG00000159214	36	5	5	16	61	44	11	12	1	0	15	55	3	2	2	46	CCDC24
ENSG00000196517	9	28	6	32	95	89	31	69	0	0	9	35	4	7	13	107	SLC6A9
ENSG00000230615	1	0	1	0	4	0	0	1	0	0	4	5	0	0	0	3	RP5-1198O20.4
ENSG00000227163	0	0	0	0	0	0	0	0	0	0	0	0	0	0	0	0	RP5-1198O20.5
ENSG00000271647	0	0	0	0	0	0	0	0	0	0	0	0	0	0	0	0	KRT8P47
ENSG00000239560	0	0	0	0	0	0	0	0	0	0	0	0	0	0	0	0	RN7SL479P
ENSG00000171872	0	1	1	0	0	0	0	0	0	0	0	0	0	0	0	1	KLF17
ENSG00000233514	0	1	0	2	1	5	3	3	1	1	1	3	0	0	0	1	RP11-570P14.1
ENSG00000239275	0	0	0	0	0	0	0	0	0	0	0	0	0	0	0	0	RP4-675G8.2
ENSG00000226804	0	0	0	0	0	0	0	0	0	0	0	0	0	0	0	0	RP4-675G8.3
ENSG00000200171	0	0	0	0	0	0	0	0	0	0	0	0	0	0	0	0	Y_RNA
ENSG00000238037	0	0	0	0	0	0	0	0	0	0	0	0	0	0	0	0	OOSP1P1
ENSG00000227994	0	0	0	0	0	0	0	0	0	0	0	0	0	0	0	0	RP5-891H21.1
ENSG00000271329	0	0	0	0	1	0	0	0	0	0	0	0	0	0	0	3	RP5-891H21.5
ENSG00000178028	109	42	14	55	102	157	24	46	4	2	47	123	7	15	31	185	DMAP1
ENSG00000117419	108	80	24	141	244	162	77	112	11	14	84	251	6	28	74	286	ERI3
ENSG00000233602	2	2	0	1	3	3	0	1	0	0	2	7	0	2	1	14	ERI3-IT1
ENSG00000252146	0	0	0	0	0	0	1	1	0	0	0	0	0	0	0	0	AL390776.1
ENSG00000199385	0	0	0	0	0	0	0	0	0	0	0	0	0	0	0	0	RNU6-369P
ENSG00000187147	177	87	28	160	278	294	72	163	3	4	46	163	11	33	62	283	RNF220
ENSG00000263381	0	0	0	0	0	0	0	0	0	0	0	0	0	0	0	0	MIR5584
ENSG00000126106	26	5	1	7	22	22	3	12	4	3	12	50	4	3	2	23	TMEM53
ENSG00000198520	6	8	2	1	0	2	0	2	1	0	6	11	1	0	3	46	C1orf228
ENSG00000199377	0	1	2	10	13	12	1	7	0	0	1	3	0	0	1	5	RNU5F-1
ENSG00000200169	5	2	0	13	10	17	2	4	1	1	4	9	1	1	2	8	RNU5D-1
ENSG00000142945	22	155	53	257	668	572	126	325	1	1	43	127	56	68	177	510	KIF2C
ENSG00000225721	0	0	0	0	5	6	0	4	0	0	0	1	0	2	1	2	RP11-269F19.2
ENSG00000142937	2372	3222	880	2591	4719	4478	1159	2605	159	155	2430	5127	600	914	1976	8447	RPS8
ENSG00000264294	0	0	0	0	0	0	0	0	0	0	0	0	0	0	0	0	SNORD55
ENSG00000200913	4	10	0	29	30	24	8	21	0	0	3	8	0	3	4	18	SNORD46
ENSG00000202031	0	3	0	0	2	2	1	1	0	0	1	1	0	0	0	6	SNORD38A
ENSG00000207421	0	0	0	0	0	0	0	0	0	0	0	0	0	0	0	0	SNORD38B
ENSG00000234093	2	5	1	4	4	8	4	3	0	0	4	5	0	0	0	10	RPS15AP11
ENSG00000142959	4	2	0	3	6	7	1	2	0	0	2	3	0	0	1	4	BEST4
ENSG00000173846	59	48	6	12	28	14	4	22	0	5	15	47	6	16	23	75	PLK3
ENSG00000188396	6	2	1	0	2	6	0	2	0	0	1	2	2	0	0	13	TCTEX1D4
ENSG00000222009	25	3	1	4	8	3	0	4	0	2	5	28	2	6	5	25	BTBD19
ENSG00000117425	2	5	2	6	10	6	2	1	0	0	4	22	1	5	6	25	PTCH2
ENSG00000202444	0	0	0	0	0	0	0	0	0	0	0	0	0	0	0	0	RNU5E-6P
ENSG00000226499	0	0	0	0	1	0	0	0	0	0	1	0	0	0	0	1	RP5-882O7.1
ENSG00000070785	30	24	18	84	124	168	31	89	3	2	45	88	6	12	37	111	EIF2B3
ENSG00000266294	0	0	0	0	0	0	0	0	0	0	0	0	0	0	0	1	AL136380.1
ENSG00000253039	0	0	0	0	0	0	0	0	0	0	0	1	0	0	0	1	RNA5SP47
ENSG00000229815	1	1	0	0	3	0	0	0	0	0	0	0	0	0	0	1	CCNB1IP1P1
ENSG00000232369	0	0	0	0	0	0	0	0	0	0	0	0	0	0	0	3	RP5-882O7.4
ENSG00000268949	1	3	0	0	3	3	0	2	0	0	0	1	0	0	0	6	MRPS17P1
ENSG00000126107	199	47	16	102	141	180	39	81	11	9	49	138	16	16	30	116	HECTD3
ENSG00000126088	156	39	30	155	168	180	52	126	16	25	70	238	18	43	49	102	UROD
ENSG00000162415	27	20	8	15	32	39	7	8	0	1	30	42	16	15	16	126	ZSWIM5
ENSG00000264650	1	0	0	0	0	1	0	0	1	0	0	0	0	0	0	0	AL359473.1
ENSG00000234315	0	0	0	0	0	0	0	0	0	0	0	1	0	0	0	1	OSTCP5
ENSG00000221707	0	0	0	0	0	0	0	0	0	0	0	1	0	0	0	0	AL592294.1
ENSG00000186603	9	8	1	51	29	69	32	45	0	0	0	8	1	1	5	15	HPDL
ENSG00000132781	56	28	11	82	186	127	38	80	5	3	16	67	3	13	26	118	MUTYH
ENSG00000132773	69	15	15	82	102	101	32	79	2	5	14	63	5	21	11	45	TOE1
ENSG00000070759	90	19	4	15	51	68	14	29	8	9	26	24	10	1	7	56	TESK2
ENSG00000238945	0	0	0	0	0	0	0	0	0	0	0	0	0	0	0	0	snoU13
ENSG00000236872	0	0	0	0	2	0	0	0	0	0	0	0	0	0	0	2	RP11-291L19.1
ENSG00000236624	39	14	2	6	16	18	3	8	1	0	10	8	1	3	5	33	CCDC163P
ENSG00000132763	18	11	9	36	59	72	15	40	2	3	15	58	8	12	21	42	MMACHC
ENSG00000117450	2587	389	91	1886	3129	3666	803	1999	263	374	445	854	105	115	307	970	PRDX1
ENSG00000234379	0	0	0	0	0	0	0	0	0	0	0	0	0	0	0	0	HMGB1P48
ENSG00000117448	425	164	38	328	712	518	127	333	79	134	217	382	48	67	161	408	AKR1A1
ENSG00000132780	221	168	107	997	1127	2052	425	996	15	11	77	303	58	169	248	785	NASP
ENSG00000159588	10	6	0	4	9	13	3	2	0	0	2	3	0	3	3	27	CCDC17
ENSG00000159592	861	264	77	400	801	1089	193	457	46	68	298	714	107	77	206	859	GPBP1L1
ENSG00000225447	1	1	2	1	2	1	0	2	0	0	3	3	0	0	3	6	RPS15AP10
ENSG00000234329	8	7	2	3	3	12	1	4	1	1	2	6	1	5	3	27	RP11-767N6.2
ENSG00000159596	124	39	25	130	164	193	42	94	6	6	65	153	15	30	46	190	TMEM69
ENSG00000197429	106	20	5	12	29	57	8	10	18	13	44	90	8	20	32	122	IPP
ENSG00000230896	7	4	1	2	4	1	2	2	0	1	3	8	1	1	2	20	RP11-767N6.7
ENSG00000236111	0	2	0	2	0	1	0	0	0	0	0	1	0	0	0	1	RP11-630I5.1
ENSG00000086015	308	107	32	105	193	239	59	115	5	16	63	178	25	45	70	390	MAST2
ENSG00000232467	1	1	0	0	1	3	0	1	1	0	0	0	0	0	0	1	TMA16P2
ENSG00000117461	68	183	52	85	150	150	49	137	5	4	57	68	13	127	134	615	PIK3R3
ENSG00000226957	0	1	0	0	0	1	1	0	0	0	0	0	0	2	0	1	RP4-533D7.4
ENSG00000233114	0	2	1	0	0	0	0	1	0	0	0	0	0	0	0	2	RP4-533D7.3
ENSG00000227857	0	0	0	0	0	0	0	0	0	0	2	0	1	0	1	0	RP4-533D7.5
ENSG00000117472	20	0	0	1	0	1	2	5	0	0	2	26	0	0	1	3	TSPAN1
ENSG00000250719	0	0	0	0	0	0	0	0	0	0	0	0	0	0	0	0	RP11-322N21.2
ENSG00000085998	306	48	19	98	176	220	37	94	14	18	153	352	29	43	96	347	POMGNT1
ENSG00000171357	4	5	0	4	16	7	1	5	1	0	2	3	0	0	0	15	LURAP1
ENSG00000085999	38	19	12	94	134	172	37	86	2	0	13	26	4	16	27	75	RAD54L
ENSG00000132128	529	120	36	107	301	268	60	114	40	40	220	654	69	73	126	471	LRRC41
ENSG00000173660	511	334	95	559	860	790	267	588	35	43	199	537	59	97	164	704	UQCRH
ENSG00000117481	99	37	12	59	84	106	23	63	11	12	36	85	14	20	27	163	NSUN4
ENSG00000225779	0	0	0	0	1	0	0	0	0	0	0	0	0	0	0	1	RP4-603I14.3
ENSG00000117480	32	13	2	17	35	24	5	17	1	0	12	40	3	8	3	51	FAAH
ENSG00000232022	1	2	0	0	1	3	0	1	0	0	0	0	0	0	0	0	RP5-1109J22.1
ENSG00000224863	0	0	0	0	0	2	0	0	0	0	0	0	0	0	0	0	RP5-1109J22.2
ENSG00000225667	0	0	0	0	0	1	0	2	0	0	0	0	0	0	1	0	LINC00505
ENSG00000197587	0	5	0	0	0	0	0	0	0	0	0	1	0	0	0	14	DMBX1
ENSG00000269956	2	1	1	0	1	0	0	2	0	0	1	2	0	0	0	6	MKNK1-AS1
ENSG00000162456	0	1	0	0	0	0	1	0	0	0	0	0	0	1	0	1	KNCN
ENSG00000079277	125	18	8	30	51	42	5	22	10	9	32	102	8	13	22	69	MKNK1
ENSG00000142961	39	7	1	22	30	37	7	19	5	5	26	54	7	6	9	27	MOB3C
ENSG00000123472	170	76	42	170	234	361	76	172	19	23	107	300	25	78	156	451	ATPAF1
ENSG00000159658	620	173	42	187	439	496	86	267	35	34	251	580	49	53	99	394	EFCAB14
ENSG00000233647	0	1	0	0	0	0	0	1	0	0	1	0	0	0	0	2	RP11-8J9.1
ENSG00000186118	3	0	0	0	1	2	0	1	0	1	0	0	0	0	0	1	TEX38
ENSG00000228237	3	2	0	1	1	2	1	1	0	0	3	1	0	1	0	2	EFCAB14-AS1
ENSG00000236476	0	0	0	0	0	0	0	0	0	0	0	0	0	0	0	0	RP11-8J9.5
ENSG00000142973	4	0	0	0	0	0	0	0	0	0	2	1	0	0	0	0	CYP4B1
ENSG00000154198	0	0	0	0	0	0	0	0	0	0	0	0	0	0	0	0	CYP4Z2P
ENSG00000238145	0	0	0	0	0	0	0	0	0	0	0	0	0	0	0	0	RP11-346M5.1
ENSG00000187048	1	0	0	0	0	0	0	0	0	0	0	0	0	0	0	0	CYP4A11
ENSG00000186377	15	1	0	9	12	17	2	12	0	0	1	8	0	1	0	7	CYP4X1
ENSG00000259832	0	0	0	0	0	0	0	0	0	0	0	0	0	0	0	0	CYP4A26P
ENSG00000261196	0	0	0	0	0	0	0	0	0	0	0	0	0	0	0	0	CYP4A43P
ENSG00000261593	0	0	0	0	0	0	0	0	0	0	0	0	0	0	0	0	CYP4A27P
ENSG00000261290	0	0	0	0	0	0	0	0	0	0	0	0	0	0	0	0	CYP4A44P
ENSG00000186160	1	0	0	0	2	0	0	1	0	0	0	0	0	0	0	0	CYP4Z1
ENSG00000225154	0	0	0	0	0	0	0	0	0	0	0	0	0	0	0	0	RP11-184J23.2
ENSG00000225506	3	0	0	2	5	4	0	2	0	0	0	0	0	1	0	3	CYP4A22-AS1
ENSG00000162365	1	0	1	0	0	1	0	0	0	0	1	2	1	0	0	3	CYP4A22
ENSG00000225514	0	0	0	0	0	0	0	0	0	0	0	0	0	0	0	0	MTND1P34
ENSG00000224805	0	1	1	0	1	0	0	0	0	0	0	0	0	1	1	1	LINC00853
ENSG00000162366	1	0	0	0	0	0	0	0	0	0	0	0	0	0	0	1	PDZK1IP1
ENSG00000162367	0	0	1	0	0	1	1	2	0	0	0	0	0	0	0	21	TAL1
ENSG00000226252	0	2	0	0	0	0	0	0	0	0	0	0	0	1	0	0	RP1-18D14.7
ENSG00000123473	86	196	39	229	425	503	118	212	4	6	33	65	32	47	85	403	STIL
ENSG00000162368	1128	257	61	137	219	283	49	136	128	172	402	854	124	55	102	485	CMPK1
ENSG00000225762	5	1	1	0	1	0	0	1	0	0	3	1	0	1	1	1	RP11-511I2.2
ENSG00000186790	0	1	0	0	0	0	0	0	0	0	0	0	0	0	0	0	FOXE3
ENSG00000237424	0	1	0	0	2	1	0	0	0	1	2	3	0	1	1	6	FOXD2-AS1
ENSG00000186564	1	1	0	0	0	0	0	0	0	0	1	9	1	0	3	6	FOXD2
ENSG00000271355	0	0	0	0	0	0	0	0	0	0	0	1	0	0	0	0	RP4-666O22.3
ENSG00000229554	0	0	0	0	0	0	0	0	0	0	0	0	0	0	0	0	RPL21P24
ENSG00000221346	0	0	0	0	0	0	0	0	0	0	0	0	0	0	0	0	AL356458.1
ENSG00000227883	0	0	0	0	0	0	0	0	0	0	0	0	0	0	0	0	ATP6V0E1P4
ENSG00000221447	0	0	0	0	0	0	0	0	0	0	0	0	0	0	0	0	AL591415.1
ENSG00000227947	0	0	0	0	0	0	0	0	0	0	0	1	0	0	0	1	RP11-543D5.1
ENSG00000269113	42	4	2	5	13	20	3	11	5	3	8	29	2	4	3	13	TRABD2B
ENSG00000223814	0	0	0	0	0	0	0	0	0	0	0	0	0	0	0	0	RP11-543D5.2
ENSG00000273395	0	0	0	0	0	0	0	0	0	0	0	0	0	0	0	0	FLJ00388
ENSG00000225028	5	0	0	0	1	0	0	1	0	1	1	4	0	0	0	2	RP11-330M19.1
ENSG00000226133	4	0	0	0	0	0	0	0	0	2	0	0	0	0	0	0	RP4-683M8.2
ENSG00000231413	0	0	0	0	0	0	0	0	0	0	0	0	0	0	0	0	RP11-193P11.3
ENSG00000237180	1	0	0	0	0	0	0	0	0	0	0	0	0	0	0	0	CYP46A4P
ENSG00000242267	2	2	0	0	0	0	0	0	0	0	1	3	0	0	1	3	SKINTL
ENSG00000269709	0	0	0	0	0	0	0	0	0	0	0	0	0	1	0	0	AL109659.1
ENSG00000223720	0	0	0	0	0	0	0	0	0	0	0	0	0	0	0	0	RP5-1024N4.2
ENSG00000117834	37	1	0	1	2	0	1	0	8	10	14	65	2	0	2	6	SLC5A9
ENSG00000272491	2	0	0	2	1	0	0	0	0	0	0	1	0	0	0	2	RP5-1024N4.4
ENSG00000132122	18	53	21	40	47	75	24	33	1	0	39	75	10	19	31	258	SPATA6
ENSG00000224986	0	0	1	0	2	0	1	0	0	0	1	0	0	2	1	3	PPP1R8P1
ENSG00000206700	0	0	0	0	0	0	0	0	0	0	0	0	0	0	0	2	RNU6-723P
ENSG00000235105	1	2	1	2	5	3	0	2	0	1	3	2	0	0	0	5	RP11-329A14.1
ENSG00000223175	0	0	0	0	0	0	0	0	0	0	0	0	0	0	0	0	RNU4-61P
ENSG00000232514	0	0	0	0	0	0	0	0	0	0	0	0	0	0	0	0	RP11-329A14.2
ENSG00000186094	0	1	0	2	0	1	2	0	0	0	0	0	0	1	0	5	AGBL4
ENSG00000162373	13	10	2	9	16	15	2	5	1	1	16	26	3	9	21	98	BEND5
ENSG00000229846	0	0	0	0	0	0	0	0	0	0	0	0	0	0	0	0	RP11-141A19.1
ENSG00000239144	0	0	0	0	0	0	0	0	0	0	0	0	0	0	0	0	snoU13
ENSG00000230114	0	0	0	0	0	0	0	0	0	0	0	0	0	0	0	0	RP11-141A19.2
ENSG00000225623	0	0	0	0	0	0	0	0	0	0	0	0	0	0	0	0	AGBL4-IT1
ENSG00000237478	0	0	0	0	0	0	0	0	0	0	0	0	0	0	0	1	RP5-926E3.1
ENSG00000215887	0	0	0	0	0	0	1	0	0	0	0	0	0	0	0	0	ZNF859P
ENSG00000221746	0	0	0	0	0	0	0	0	0	0	0	0	0	0	0	0	AL645730.1
ENSG00000227839	0	1	0	0	0	0	0	0	0	0	0	0	0	0	0	3	AL645730.2
ENSG00000233595	0	0	0	0	0	0	0	0	0	0	0	0	0	0	0	0	MTND2P29
ENSG00000162374	0	67	20	2	2	5	0	1	0	0	0	0	0	66	103	369	ELAVL4
ENSG00000230828	0	0	0	0	0	0	0	0	0	0	0	0	0	0	1	1	RP11-492I2.1
ENSG00000237337	0	0	0	0	0	0	0	0	0	0	0	0	0	0	0	3	RP11-567C20.2
ENSG00000233407	0	0	0	0	0	0	0	0	0	0	0	0	0	0	0	0	RP11-567C20.3
ENSG00000234080	0	1	0	1	0	1	0	0	0	0	0	1	0	0	0	2	RP11-183G22.1
ENSG00000229316	0	0	0	0	0	0	0	0	0	0	0	0	0	0	0	1	HMGB1P45
ENSG00000225671	0	0	1	0	0	0	0	0	0	0	0	0	0	0	0	2	FCF1P6
ENSG00000142700	0	16	2	0	1	0	0	0	0	0	0	0	0	0	0	57	DMRTA2
ENSG00000271782	0	0	0	0	0	0	0	0	0	0	0	2	0	0	0	2	RP5-850O15.4
ENSG00000185104	150	106	41	156	289	311	62	182	14	13	102	189	26	45	76	440	FAF1
ENSG00000225767	2	1	0	0	1	6	3	0	0	0	1	0	1	0	1	13	RP5-850O15.3
ENSG00000202140	0	0	0	0	0	1	0	0	0	0	1	0	0	0	0	0	Y_RNA
ENSG00000207194	0	1	0	0	0	0	0	0	0	0	0	1	0	0	0	1	RNU6-1026P
ENSG00000252825	0	0	0	0	0	0	0	0	0	0	0	0	0	0	0	0	RNU6-1253P
ENSG00000230585	0	3	0	0	2	4	1	3	2	0	0	1	0	0	0	4	PHBP12
ENSG00000237130	0	0	0	1	1	1	0	1	0	0	0	0	0	0	0	1	MRPS6P2
ENSG00000123080	2	1	1	0	0	0	0	0	0	0	16	28	1	0	4	6	CDKN2C
ENSG00000265538	0	0	0	0	0	0	0	0	0	0	0	0	0	0	0	0	MIR4421
ENSG00000204006	0	0	0	0	0	1	0	0	0	0	0	0	0	0	0	0	C1orf185
ENSG00000200262	0	0	0	0	0	0	0	0	0	0	0	0	0	0	0	0	Y_RNA
ENSG00000213478	0	0	0	1	0	0	0	0	0	0	0	0	0	0	0	1	CFL1P2
ENSG00000239101	0	0	0	0	0	0	0	0	0	0	0	0	0	0	0	0	AL162430.2
ENSG00000221492	0	0	0	0	0	0	0	0	0	0	0	0	0	0	0	0	AL162430.1
ENSG00000203356	0	0	0	0	0	1	1	0	0	0	0	0	0	0	0	0	RP11-296A18.3
ENSG00000238618	0	0	0	0	0	0	0	0	0	0	0	0	0	0	0	0	snoU13
ENSG00000123091	876	316	70	261	474	550	106	238	52	87	248	593	63	105	179	941	RNF11
ENSG00000233406	5	1	0	0	1	2	0	1	0	0	0	0	1	0	1	1	RP11-296A18.5
ENSG00000236434	0	4	0	0	0	2	0	1	0	1	0	1	0	0	1	2	RP11-296A18.6
ENSG00000085831	180	4	3	16	30	63	9	17	12	14	11	41	4	1	2	14	TTC39A
ENSG00000261664	0	0	0	0	0	1	0	0	0	0	0	0	0	0	0	1	RP11-275F13.1
ENSG00000085832	448	197	70	203	579	584	104	310	31	35	149	383	41	86	119	789	EPS15
ENSG00000232027	1	1	0	0	2	4	0	1	0	0	1	2	0	0	0	8	RP11-275F13.3
ENSG00000206595	0	0	0	0	0	0	0	1	0	0	0	0	0	0	0	2	RNU6-877P
ENSG00000238140	0	0	0	0	0	1	1	0	0	0	0	0	0	1	0	1	RP11-253A20.1
ENSG00000227070	1	1	0	0	2	0	1	0	0	0	0	0	0	0	0	2	RP11-191G24.1
ENSG00000252032	0	0	0	0	0	0	0	0	0	0	0	0	0	0	0	0	RNU6-1281P
ENSG00000227742	1	0	0	0	0	0	0	0	0	0	0	0	0	0	0	1	CALR4P
ENSG00000117859	1166	184	74	282	541	727	164	334	98	128	285	643	96	109	183	813	OSBPL9
ENSG00000236973	0	1	0	0	0	0	0	0	0	0	0	1	0	0	0	2	GAPDHP51
ENSG00000232846	0	0	0	0	0	0	0	0	0	0	0	0	0	0	0	0	SLC25A6P3
ENSG00000212624	0	0	0	1	1	0	0	0	0	0	1	0	0	0	0	2	SNORA26
ENSG00000078618	593	322	92	388	719	928	196	474	43	73	259	507	60	73	159	789	NRD1
ENSG00000266993	2	5	1	2	4	3	1	1	1	1	3	6	0	0	0	18	RP4-657D16.3
ENSG00000272175	0	0	0	1	0	1	0	0	0	0	0	0	0	0	0	0	RP4-657D16.6
ENSG00000212076	0	0	0	0	0	0	0	0	0	0	0	0	0	0	0	0	MIR761
ENSG00000230604	0	0	0	0	0	2	0	0	0	0	0	0	0	0	0	2	TSEN15P2
ENSG00000212174	1	0	0	0	0	2	0	0	0	0	1	0	0	0	0	1	Y_RNA
ENSG00000265769	0	0	0	0	0	0	0	0	0	0	0	0	0	0	0	0	AL589663.1
ENSG00000169213	2193	115	37	463	762	1191	209	529	103	194	452	588	132	42	48	476	RAB3B
ENSG00000200839	2	0	0	1	0	0	0	0	0	0	0	0	0	0	0	0	RNA5SP48
ENSG00000229032	0	1	0	0	0	0	0	0	0	0	1	0	0	0	0	0	RP11-91A18.1
ENSG00000264613	0	0	0	0	0	0	0	0	0	0	0	0	0	0	0	0	RN7SL290P
ENSG00000117862	405	120	31	222	553	463	115	260	31	44	279	420	81	40	96	327	TXNDC12
ENSG00000198841	50	29	3	31	37	32	8	25	2	1	15	42	4	5	8	35	KTI12
ENSG00000223390	0	0	0	0	3	0	0	0	0	0	0	1	0	0	0	4	RP11-91A18.4
ENSG00000228369	1	0	0	0	3	1	1	0	0	0	0	2	0	1	0	2	TXNDC12-AS1
ENSG00000134717	308	140	68	417	634	829	175	403	10	33	214	509	77	124	202	854	BTF3L4
ENSG00000157077	252	121	30	195	305	399	97	224	13	30	99	252	42	44	98	430	ZFYVE9
ENSG00000241745	0	0	0	0	0	1	0	0	0	0	0	0	0	0	0	1	RN7SL788P
ENSG00000228407	4	2	0	0	2	4	0	1	0	0	2	0	1	0	0	3	RP4-800M22.1
ENSG00000223429	0	1	0	1	2	0	1	3	0	0	0	0	0	1	0	4	RP4-800M22.2
ENSG00000224255	0	0	0	0	0	0	0	0	0	0	0	0	0	1	0	1	PDCL3P6
ENSG00000236004	0	0	0	0	1	0	0	0	0	0	0	0	0	0	0	1	RP4-800M22.4
ENSG00000237663	0	0	0	0	0	0	0	0	0	0	0	1	0	0	0	0	DNAJC19P7
ENSG00000213735	0	1	0	0	0	0	0	0	0	0	1	0	0	0	0	5	ANAPC10P1
ENSG00000154222	309	52	16	78	115	142	29	57	9	21	48	136	31	23	46	219	CC2D1B
ENSG00000272100	1	1	0	0	2	0	1	1	0	0	1	0	0	0	0	1	RP11-155O18.6
ENSG00000224680	0	0	1	2	2	3	1	1	1	0	0	0	0	0	0	2	PLA2G12AP1
ENSG00000085840	9	32	15	286	285	434	108	246	0	0	19	31	10	23	45	126	ORC1
ENSG00000134748	112	193	52	149	232	283	70	157	13	6	83	202	17	50	93	412	PRPF38A
ENSG00000134744	484	640	169	169	474	566	89	242	30	59	295	441	79	172	333	2414	ZCCHC11
ENSG00000239063	0	2	0	0	0	2	0	0	0	0	0	0	0	0	0	4	snoU13
ENSG00000272371	0	1	0	0	0	2	0	0	0	0	0	1	0	1	1	3	RP11-25O10.2
ENSG00000236290	0	0	0	0	1	1	0	0	0	0	0	0	0	1	0	1	EEF1GP7
ENSG00000116157	93	16	8	23	40	35	16	22	8	5	26	72	6	14	44	113	GPX7
ENSG00000182183	0	2	0	1	2	3	1	0	1	0	0	0	0	0	3	3	FAM159A
ENSG00000162377	53	22	11	142	198	251	42	141	4	4	21	71	6	23	19	48	COA7
ENSG00000233664	0	0	0	0	0	1	0	0	0	0	0	0	0	0	0	0	NDUFS5P3
ENSG00000239640	0	0	0	0	0	0	0	0	0	0	0	0	0	0	0	0	RN7SL62P
ENSG00000162378	536	280	38	242	386	545	108	211	32	53	208	469	58	122	190	653	ZYG11B
ENSG00000252018	0	0	0	0	0	0	0	0	0	0	0	0	0	0	0	0	RNU2-30P
ENSG00000228929	8	15	1	8	10	14	6	11	1	0	6	16	3	4	4	19	RP11-159C21.4
ENSG00000206627	0	0	0	0	0	1	0	0	0	0	0	0	0	0	0	3	RNU6-969P
ENSG00000203995	82	13	0	9	41	69	7	17	11	6	6	9	2	1	0	27	ZYG11A
ENSG00000242391	1	1	0	0	0	1	0	1	0	0	0	0	0	0	0	1	RP4-631H13.2
ENSG00000121310	344	13	5	23	76	95	8	36	21	16	16	27	1	2	4	44	ECHDC2
ENSG00000230953	11	1	0	0	2	0	0	0	1	2	1	1	0	0	1	0	RP4-631H13.6
ENSG00000231866	0	0	0	0	0	0	0	0	0	0	0	0	0	0	0	1	RP4-631H13.4
ENSG00000116171	480	60	33	106	193	317	54	141	85	110	220	430	38	39	82	356	SCP2
ENSG00000264834	0	0	0	0	0	0	0	0	0	0	0	0	0	0	0	2	MIR1273F
ENSG00000266188	0	0	0	0	0	0	0	0	0	0	0	0	0	0	0	0	MIR5095
ENSG00000265815	0	0	0	0	0	0	0	0	0	0	0	0	0	0	0	0	MIR1273G
ENSG00000237279	0	0	0	0	0	0	0	0	0	0	0	0	0	0	0	0	RP4-631H13.5
ENSG00000236360	0	1	0	0	1	1	0	1	0	0	0	0	0	0	0	0	RP11-334A14.2
ENSG00000226147	0	0	0	0	0	0	0	0	0	0	0	1	0	0	0	0	TUBBP10
ENSG00000174348	0	4	2	0	2	1	0	1	0	0	3	15	0	0	3	28	PODN
ENSG00000232993	0	0	0	0	0	0	0	0	0	0	0	0	0	0	0	0	RP11-334A14.5
ENSG00000227644	0	0	0	0	0	0	0	0	0	0	0	0	0	0	0	0	HIGD1AP11
ENSG00000162383	0	0	0	0	0	1	0	0	0	0	7	4	0	0	0	9	SLC1A7
ENSG00000235563	1	0	1	0	0	0	0	0	0	0	1	0	0	0	0	3	RP11-334A14.8
ENSG00000157184	103	38	12	79	139	156	31	68	5	11	64	146	10	10	18	81	CPT2
ENSG00000236723	0	0	0	0	0	0	0	0	0	0	0	0	0	0	0	0	RP5-1024G6.2
ENSG00000162384	55	24	10	57	151	145	32	73	8	8	45	117	11	21	48	140	C1orf123
ENSG00000259818	0	7	6	0	3	1	0	2	0	0	0	1	1	1	2	7	RP5-1024G6.7
ENSG00000162385	45	34	8	63	74	99	26	59	5	3	19	49	5	16	22	102	MAGOH
ENSG00000226754	2	0	1	1	2	5	0	3	0	0	0	5	0	0	1	1	RP5-1024G6.5
ENSG00000270172	0	4	4	20	32	54	17	28	0	0	4	13	0	16	10	46	RP5-1024G6.8
ENSG00000157193	17	68	14	181	369	412	84	181	3	1	31	63	7	42	47	323	LRP8
ENSG00000234578	0	0	0	1	0	0	0	0	0	0	0	0	0	0	0	0	RP4-784A16.1
ENSG00000228838	0	0	0	3	2	0	0	1	0	0	1	0	0	0	0	4	RP4-784A16.2
ENSG00000225030	0	0	0	1	2	3	0	3	0	0	0	0	0	0	0	2	RP4-784A16.3
ENSG00000232762	0	1	0	1	4	8	2	10	0	0	1	2	0	1	2	11	RP4-784A16.4
ENSG00000225675	0	1	1	0	0	2	1	0	0	0	0	0	0	0	0	0	RP4-784A16.5
ENSG00000226938	0	0	0	0	0	0	0	0	0	0	0	0	0	0	0	1	RP11-117D22.1
ENSG00000230138	0	0	0	0	0	0	0	0	0	0	0	0	0	0	0	0	RP11-117D22.2
ENSG00000236253	0	0	1	0	0	2	0	1	0	0	0	1	0	0	0	1	SLC25A3P1
ENSG00000143006	0	0	0	0	0	0	0	0	0	0	0	0	0	0	0	2	DMRTB1
ENSG00000174332	5	3	1	0	0	0	0	0	1	0	17	44	1	0	4	3	GLIS1
ENSG00000239007	0	0	0	0	0	0	0	0	0	0	0	0	0	0	0	1	RNU7-95P
ENSG00000058804	164	89	46	636	875	1282	304	653	4	13	142	238	57	79	188	532	NDC1
ENSG00000201003	0	1	0	0	1	0	0	0	0	0	0	0	0	0	0	0	SNORA58
ENSG00000264454	0	0	0	0	0	0	0	0	0	0	0	0	0	0	0	1	AL049745.1
ENSG00000229687	0	0	0	0	0	0	0	0	0	0	0	0	0	0	0	0	RP4-654H19.2
ENSG00000058799	193	40	10	66	126	163	26	63	11	9	45	84	6	24	46	148	YIPF1
ENSG00000211452	122	2	0	1	2	2	0	0	77	123	2	0	0	0	0	7	DIO1
ENSG00000081870	122	28	12	52	99	104	21	50	6	13	49	91	11	20	30	76	HSPB11
ENSG00000116212	334	83	21	119	243	198	51	105	19	34	61	126	18	31	64	213	LRRC42
ENSG00000219102	0	0	0	0	0	0	0	2	0	0	0	0	0	0	0	0	HNRNPA3P12
ENSG00000203985	7	0	0	0	0	0	0	0	3	0	0	0	0	0	0	1	LDLRAD1
ENSG00000197015	0	0	0	0	0	0	0	0	0	0	0	0	0	0	0	0	AL353898.1
ENSG00000272091	23	10	3	6	9	9	4	3	1	3	15	45	3	2	9	18	RP4-758J24.5
ENSG00000116209	1151	248	66	184	342	345	90	214	68	130	332	753	79	62	141	588	TMEM59
ENSG00000203276	1	5	1	0	1	2	0	1	0	0	1	2	0	0	2	12	AL353898.2
ENSG00000116205	45	24	10	28	36	67	14	26	2	1	23	78	5	15	20	65	TCEANC2
ENSG00000264208	0	0	0	0	0	0	0	0	0	0	0	0	0	0	0	1	MIR4781
ENSG00000225183	0	0	0	0	0	0	0	0	0	0	1	0	0	0	1	0	RP4-758J24.4
ENSG00000237611	1	0	0	1	3	1	1	1	0	0	0	3	1	1	1	1	AL353898.3
ENSG00000212670	2	5	1	1	5	11	0	1	0	1	5	11	1	1	1	9	AL161915.1
ENSG00000157211	0	0	0	2	0	0	0	1	0	0	0	0	0	0	0	1	CDCP2
ENSG00000256407	0	2	0	0	0	0	0	1	0	0	0	0	0	0	0	0	RP11-446E24.4
ENSG00000248835	5	10	1	12	32	20	8	16	0	0	11	20	0	4	8	24	AL357673.1
ENSG00000215883	12	13	5	23	46	44	12	28	0	0	22	23	4	3	11	54	CYB5RL
ENSG00000116221	227	73	27	278	407	433	104	248	21	25	85	198	22	29	43	195	MRPL37
ENSG00000157216	226	118	42	205	312	313	86	197	4	13	73	186	27	64	107	477	SSBP3
ENSG00000198711	2	2	0	0	9	3	0	4	0	0	0	4	0	1	2	15	SSBP3-AS1
ENSG00000225632	2	0	1	1	1	1	0	3	0	0	1	0	1	0	0	3	RP5-997D24.3
ENSG00000232245	0	0	0	0	0	0	0	0	0	0	0	0	0	0	0	0	RP4-705F19.1
ENSG00000265404	0	0	0	0	0	0	0	0	0	0	0	0	0	0	0	0	AC099796.1
ENSG00000235741	0	0	0	0	0	0	0	0	0	0	0	0	0	0	0	0	RP5-866L20.1
ENSG00000237173	0	0	0	0	0	0	0	0	0	0	0	0	0	0	0	0	RP5-866L20.2
ENSG00000252646	0	0	0	0	0	0	0	0	0	0	0	0	0	0	0	0	SNORD112
ENSG00000227453	0	0	0	0	0	0	0	0	0	0	0	0	0	0	0	0	HNRNPA1P63
ENSG00000162390	29	3	1	9	17	20	3	8	1	3	7	32	2	0	8	14	ACOT11
ENSG00000162391	73	0	0	3	2	0	0	0	31	24	1	9	1	0	1	5	FAM151A
ENSG00000230728	0	0	0	0	0	0	0	0	0	0	0	0	0	0	0	0	RP11-240D10.4
ENSG00000271723	0	0	0	0	0	0	0	0	0	0	1	0	0	0	0	0	MROH7-TTC4
ENSG00000184313	0	0	0	0	1	0	0	0	0	0	0	2	0	0	0	3	MROH7
ENSG00000243725	9	7	1	5	19	18	5	7	2	1	6	7	3	1	2	18	TTC4
ENSG00000162396	29	16	3	23	81	67	16	19	4	3	24	56	5	2	14	28	PARS2
ENSG00000006555	13	2	0	3	7	8	1	4	2	0	0	0	0	0	0	9	TTC22
ENSG00000237453	1	0	0	1	1	0	0	0	0	0	0	0	0	0	0	0	RP11-67L3.2
ENSG00000162398	1	0	0	1	0	2	1	0	0	0	0	1	0	0	0	3	C1orf177
ENSG00000116133	2274	207	32	1984	1542	1886	616	1320	422	721	543	816	85	115	172	678	DHCR24
ENSG00000242396	1	0	0	0	0	0	0	0	0	0	1	0	0	0	0	0	RP11-67L3.5
ENSG00000233203	4	0	0	1	1	2	0	2	0	0	0	0	0	1	0	0	RP11-67L3.4
ENSG00000143001	0	0	0	0	0	1	0	0	0	1	0	0	0	0	0	0	TMEM61
ENSG00000233271	0	0	0	0	0	0	0	0	0	0	0	0	0	0	0	0	RP11-12C17.2
ENSG00000162399	1	0	0	1	1	3	0	1	0	1	1	1	0	0	0	3	BSND
ENSG00000169174	0	13	3	205	101	66	16	173	10	16	35	16	9	5	10	95	PCSK9
ENSG00000162402	717	300	107	363	672	704	174	396	51	72	372	732	133	119	254	1622	USP24
ENSG00000231090	0	0	0	0	1	0	0	0	0	0	0	0	0	0	0	0	RP11-101C11.1
ENSG00000231095	0	0	0	0	0	1	0	0	0	0	0	0	0	0	0	1	GYG1P3
ENSG00000265822	0	0	0	0	0	0	0	0	0	0	0	0	0	0	0	0	MIR4422
ENSG00000231900	0	0	0	0	0	0	0	0	0	0	0	0	0	0	0	0	GOT2P1
ENSG00000232198	0	0	0	0	0	0	0	0	0	0	0	0	0	0	0	0	RP4-633H17.2
ENSG00000199831	0	0	0	1	0	2	0	0	0	0	0	0	0	0	0	0	RN7SKP291
ENSG00000252162	0	0	0	0	0	0	0	0	0	0	0	0	0	0	0	0	RNU6-830P
ENSG00000272051	0	0	0	0	0	0	0	0	0	0	0	0	0	0	0	0	Y_RNA
ENSG00000234810	0	0	0	0	0	0	0	0	0	0	2	3	0	0	0	0	RP11-466L17.1
ENSG00000233147	0	0	0	0	0	0	0	0	0	0	0	0	0	0	0	0	RP11-90C4.1
ENSG00000230250	0	0	0	0	0	0	0	0	0	0	0	0	0	0	0	0	RP11-90C4.2
ENSG00000227104	0	0	0	0	0	0	0	0	0	0	0	0	0	0	0	0	PIGQP1
ENSG00000233079	0	0	0	0	0	0	0	0	0	0	0	0	0	0	0	0	RP11-90C4.3
ENSG00000235612	0	0	0	0	0	0	0	0	0	0	0	0	0	0	0	0	RP1-158P9.1
ENSG00000229871	0	0	0	0	0	0	0	0	0	0	0	0	0	0	0	0	RP4-710M16.1
ENSG00000260971	0	0	0	0	0	0	1	0	0	0	0	1	0	0	0	1	RP11-504A18.1
ENSG00000223307	0	0	0	0	0	0	0	0	0	0	0	0	0	0	0	1	AC119674.1
ENSG00000223956	47	2	0	0	2	0	0	1	0	0	0	0	0	0	0	2	RP4-710M16.2
ENSG00000162407	722	37	19	181	211	404	90	198	22	38	116	543	16	31	64	227	PPAP2B
ENSG00000236776	0	0	0	1	0	1	1	1	0	0	0	1	0	0	0	2	RPL21P23
ENSG00000224980	1	0	0	0	0	0	0	0	0	0	0	0	0	0	0	0	RP11-377K22.3
ENSG00000225475	0	0	0	1	0	1	0	1	0	0	2	1	0	0	1	2	RP11-377K22.2
ENSG00000162409	138	94	24	83	318	292	34	138	6	10	82	187	28	46	69	424	PRKAA2
ENSG00000187889	33	1	5	5	0	4	0	2	6	9	3	8	0	3	1	14	C1orf168
ENSG00000229913	0	0	0	0	0	0	0	0	0	0	0	0	0	0	0	0	RP11-378I13.1
ENSG00000157131	9	1	1	0	0	0	0	0	6	10	3	0	1	0	0	0	C8A
ENSG00000021852	36	1	0	0	0	0	0	0	9	21	0	0	0	0	0	3	C8B
ENSG00000236341	0	0	0	0	0	0	0	0	0	0	0	0	0	0	0	2	RP5-1103B4.3
ENSG00000221591	0	0	0	0	0	0	0	0	0	0	0	0	0	0	0	0	AL161740.1
ENSG00000173406	115	33	13	56	74	84	23	52	28	46	8	64	3	14	12	323	DAB1
ENSG00000227935	1	1	0	0	1	0	0	2	0	0	0	0	0	0	0	6	RP6-102O10.1
ENSG00000236888	0	0	0	0	1	0	0	0	0	0	0	0	0	0	0	1	RPS20P5
ENSG00000238773	0	0	0	0	0	1	0	0	0	0	0	0	0	0	0	0	AL137855.1
ENSG00000226759	0	4	0	2	2	4	1	1	0	0	0	0	0	0	0	8	DAB1-AS1
ENSG00000229887	0	0	0	1	2	1	0	0	0	0	0	0	0	0	0	2	HNRNPA1P6
ENSG00000223416	0	0	0	0	0	2	0	1	0	0	0	0	0	0	1	0	RPS26P15
ENSG00000235038	0	0	0	0	0	2	0	1	0	0	0	0	0	0	0	4	RP11-393I23.4
ENSG00000230546	0	0	0	0	0	0	0	0	0	0	0	0	0	0	0	0	RP11-393I23.3
ENSG00000233216	0	0	0	0	0	1	0	0	0	0	0	0	0	1	0	3	RP11-414C16.1
ENSG00000162600	78	53	16	59	83	107	24	53	11	18	49	76	5	10	36	226	OMA1
ENSG00000270209	0	0	0	0	0	0	0	0	0	0	0	0	0	0	0	2	RP4-592A1.4
ENSG00000264128	0	0	0	0	0	0	0	0	0	0	0	0	0	0	0	0	RN7SL713P
ENSG00000184292	38	5	2	1	4	6	2	6	1	0	0	0	0	1	0	32	TACSTD2
ENSG00000185839	2	0	0	2	3	3	0	0	0	0	1	1	1	0	0	3	RP4-592A1.2
ENSG00000162601	425	222	45	314	719	1004	134	491	31	35	101	231	54	49	87	604	MYSM1
ENSG00000222168	0	0	0	0	0	0	0	0	0	0	0	0	0	0	0	0	Y_RNA
ENSG00000264081	0	0	0	0	0	0	0	0	0	0	0	0	0	0	0	0	AL136985.1
ENSG00000177606	563	273	81	58	67	66	17	60	29	33	229	323	47	26	82	965	JUN
ENSG00000234807	1	1	0	0	0	0	0	1	0	0	0	0	0	0	0	0	LINC01135
ENSG00000272226	0	0	0	0	1	0	0	0	0	0	1	0	0	0	0	0	RP11-63G10.3
ENSG00000231740	0	1	0	0	0	0	0	0	0	0	0	0	0	0	0	0	RP11-63G10.2
ENSG00000232453	11	2	0	0	0	0	0	2	2	0	3	20	0	0	0	0	RP4-794H19.1
ENSG00000228121	0	0	0	0	1	0	1	0	0	0	0	0	0	0	0	0	PHBP3
ENSG00000230812	1	0	0	0	0	0	0	0	0	0	1	1	0	1	0	0	RP4-794H19.4
ENSG00000241042	0	0	0	0	0	0	0	1	0	0	0	0	0	0	0	0	RP11-145M4.1
ENSG00000235215	0	0	0	0	0	0	0	1	0	0	0	0	0	0	0	0	RP11-145M4.2
ENSG00000237352	0	0	0	0	0	0	0	0	0	0	0	0	0	0	0	0	RP11-145M4.3
ENSG00000224609	0	0	0	0	0	0	0	0	0	0	1	0	0	1	0	0	RP11-470E16.1
ENSG00000270457	0	1	0	0	0	1	0	0	0	0	0	2	0	0	0	0	RP11-467C18.1
ENSG00000172456	35	103	18	18	71	57	8	24	4	7	20	35	5	10	15	277	FGGY
ENSG00000266150	0	0	0	0	0	0	0	0	0	0	0	0	0	0	0	0	MIR4711
ENSG00000226883	0	0	0	0	0	1	0	0	0	0	0	0	0	0	0	0	RP4-782L23.2
ENSG00000231816	0	1	0	0	0	0	0	0	0	0	0	0	0	0	2	4	RP4-782L23.1
ENSG00000134709	235	67	13	202	396	626	118	232	21	37	250	461	80	9	19	144	HOOK1
ENSG00000134716	14	1	0	13	16	14	2	3	0	0	7	5	1	1	1	1	CYP2J2
ENSG00000265535	0	0	0	0	0	0	0	0	0	0	0	0	0	0	0	0	RN7SL475P
ENSG00000162598	0	0	0	0	2	2	0	1	0	0	1	0	0	0	0	0	C1orf87
ENSG00000229332	0	0	0	0	0	0	0	0	0	0	0	0	0	0	0	1	PGBD4P8
ENSG00000238242	0	0	0	0	0	0	0	0	0	0	0	0	0	0	0	0	RP11-575B7.3
ENSG00000226476	1	0	0	1	5	9	0	0	0	0	0	2	0	1	0	6	RP11-776H12.1
ENSG00000231252	0	0	0	0	1	0	0	0	0	0	0	0	0	0	0	5	RP11-436K8.1
ENSG00000162599	16	28	8	8	11	8	2	4	4	4	49	265	11	30	87	88	NFIA
ENSG00000237928	1	0	0	0	1	0	0	0	0	0	0	0	0	0	0	0	RP4-668G5.1
ENSG00000263380	0	0	0	0	0	0	0	0	0	0	0	0	0	0	0	0	AC096534.1
ENSG00000270742	0	0	0	1	2	0	0	1	0	0	0	4	0	0	0	2	RP4-802A10.1
ENSG00000237853	0	3	0	0	1	0	0	2	0	0	1	2	0	0	2	1	RP5-833A20.1
ENSG00000264551	0	0	0	0	0	0	0	0	0	0	0	0	0	0	0	0	AC099791.1
ENSG00000223920	0	0	0	0	0	0	0	0	0	0	0	0	0	0	0	2	RP11-430G17.1
ENSG00000162604	126	66	22	32	84	64	11	37	6	14	71	137	22	20	50	212	TM2D1
ENSG00000271200	1	0	1	0	0	0	0	0	0	0	0	0	0	0	0	4	RP11-430G17.3
ENSG00000132849	539	33	11	250	482	671	144	349	29	46	242	551	65	15	35	174	INADL
ENSG00000200575	0	0	0	0	0	1	0	0	0	0	0	0	0	0	0	0	RNU6-414P
ENSG00000212360	0	0	0	0	0	1	0	1	0	0	0	0	0	0	0	0	RNU6-1177P
ENSG00000236646	0	0	0	0	0	1	0	0	0	0	0	0	0	0	0	0	LAMTOR5P1
ENSG00000242860	0	0	0	0	0	1	0	0	0	0	0	0	0	0	1	0	RN7SL180P
ENSG00000263908	0	0	0	0	0	0	0	0	0	0	0	0	0	0	0	0	MIR3116-2
ENSG00000234204	0	0	0	0	0	0	0	0	0	0	0	0	0	0	0	0	PIGPP2
ENSG00000234088	0	0	0	0	0	0	0	0	0	0	0	0	0	0	0	0	RPS15AP7
ENSG00000240563	22	9	14	3542	3925	5487	1493	3463	1	3	7	40	4	12	22	49	L1TD1
ENSG00000237227	2	0	0	15	15	13	4	9	0	0	0	0	0	0	2	1	RP5-1155K23.4
ENSG00000200174	0	0	0	0	0	0	0	0	0	0	0	0	0	0	0	0	Y_RNA
ENSG00000132854	120	2	0	0	3	6	0	4	8	12	156	197	11	17	66	33	KANK4
ENSG00000201153	0	0	0	0	0	0	0	0	0	0	0	0	0	0	0	1	RNU6-371P
ENSG00000162607	147	219	73	466	613	698	182	461	5	22	152	274	50	157	229	629	USP1
ENSG00000116641	357	195	104	144	262	358	101	180	19	20	130	403	42	117	210	1093	DOCK7
ENSG00000270549	1	0	0	0	0	0	0	0	0	0	0	0	0	0	0	3	RP11-293K19.1
ENSG00000132855	219	3	2	0	7	9	2	3	245	943	87	119	9	2	6	25	ANGPTL3
ENSG00000269624	7	0	0	0	1	3	1	3	7	7	6	5	3	1	2	17	AL138847.1
ENSG00000213703	1	3	0	1	1	2	0	0	0	0	0	2	0	0	3	1	RP5-849H19.2
ENSG00000235545	1	1	0	4	1	4	0	2	0	0	0	2	0	0	2	18	RP11-230B22.1
ENSG00000125703	22	33	11	74	163	155	36	55	2	5	32	47	6	18	41	121	ATG4C
ENSG00000234318	0	0	1	0	1	0	0	0	0	0	0	0	0	0	0	0	RP4-771M4.3
ENSG00000237163	0	0	0	0	0	0	0	0	0	0	0	0	0	0	0	0	RP4-771M4.2
ENSG00000229537	0	0	0	0	0	0	0	0	0	0	0	0	0	0	0	0	RP11-5P4.1
ENSG00000227485	0	0	0	0	0	0	0	0	0	0	0	0	0	0	0	0	RP11-5P4.2
ENSG00000229225	0	0	0	0	0	0	0	0	0	0	0	0	0	0	0	0	RP11-5P4.3
ENSG00000203605	0	0	0	0	0	0	0	0	0	0	0	0	0	0	0	0	RP11-335E6.2
ENSG00000271593	0	1	0	0	0	0	0	0	0	0	0	0	0	0	0	0	RP11-335E6.4
ENSG00000252259	0	0	0	0	0	0	0	0	0	0	0	0	0	0	0	0	RNA5SP49
ENSG00000224209	0	0	0	2	2	0	0	3	0	0	0	0	0	0	0	1	LINC00466
ENSG00000228734	0	0	0	0	0	2	0	0	0	0	0	0	0	0	0	0	RP11-335E6.3
ENSG00000223683	0	0	0	0	0	0	1	0	0	0	0	0	0	0	0	0	AL138935.1
ENSG00000230798	0	0	1	151	137	170	36	128	0	0	0	0	0	4	3	11	RP4-792G4.2
ENSG00000187140	0	1	0	102	75	103	25	115	0	0	0	0	0	4	1	11	FOXD3
ENSG00000252784	0	0	0	0	0	0	0	0	0	0	0	0	0	0	0	0	Y_RNA
ENSG00000236674	0	0	0	0	0	0	0	0	0	0	0	0	0	0	0	0	RP4-792G4.3
ENSG00000088035	55	21	10	122	157	289	60	145	5	9	34	80	9	25	38	148	ALG6
ENSG00000142856	35	54	18	86	148	178	41	101	3	7	51	82	12	43	87	237	ITGB3BP
ENSG00000203965	12	29	9	15	26	28	7	14	0	0	28	39	6	20	31	178	EFCAB7
ENSG00000264271	0	0	0	0	0	0	0	0	0	0	0	0	0	0	0	1	RN7SL488P
ENSG00000251720	0	0	0	0	0	0	0	0	0	0	0	0	0	1	0	2	RNU7-123P
ENSG00000116652	1	3	0	1	1	0	0	1	0	0	1	2	0	0	0	10	DLEU2L
ENSG00000079739	297	63	31	78	240	287	44	121	22	31	158	318	76	25	54	283	PGM1
ENSG00000244256	0	0	0	0	0	1	0	0	0	0	0	0	0	0	0	1	RN7SL130P
ENSG00000185483	106	33	11	558	897	984	303	657	21	24	115	305	50	18	80	206	ROR1
ENSG00000177452	0	1	2	2	16	15	0	8	0	0	4	3	5	0	2	10	RP4-597J3.1
ENSG00000228056	0	1	0	0	6	13	1	3	0	0	1	0	2	0	1	0	CFL1P3
ENSG00000207190	0	0	0	1	1	0	0	1	0	0	0	0	0	0	0	0	RNU6-809P
ENSG00000200508	0	0	0	0	1	1	0	0	0	0	0	0	0	0	0	0	Y_RNA
ENSG00000223949	6	1	0	3	15	26	2	8	1	0	8	10	3	0	3	20	RP11-24J23.2
ENSG00000177414	0	0	1	0	1	0	0	0	0	0	1	0	0	0	0	0	UBE2U
ENSG00000238653	0	0	0	0	0	0	0	0	0	0	0	0	0	0	0	0	RNU7-62P
ENSG00000158966	310	233	87	323	380	807	196	368	25	5	62	100	20	121	244	1418	CACHD1
ENSG00000264470	0	1	0	0	0	0	0	0	0	0	0	0	0	0	0	1	MIR4794
ENSG00000162437	167	57	22	124	247	306	54	171	6	15	71	172	31	34	80	325	RAVER2
ENSG00000162434	2918	130	44	122	326	287	50	117	82	96	268	721	81	75	165	328	JAK1
ENSG00000234784	1	0	0	0	0	1	0	0	0	0	0	0	0	1	0	0	RP11-182I10.1
ENSG00000233877	2	0	0	0	0	0	0	0	0	0	2	1	0	1	0	4	RP11-182I10.2
ENSG00000226891	9	1	2	0	2	3	0	0	0	0	0	0	0	3	3	8	RP11-182I10.3
ENSG00000185031	0	0	1	0	1	3	0	0	0	0	0	2	0	0	0	0	SLC2A3P2
ENSG00000272506	0	1	1	0	1	2	0	0	0	0	0	0	1	0	0	0	RP4-535B20.4
ENSG00000212257	1	0	0	0	0	0	0	0	0	0	0	0	0	1	0	0	RNU6-1176P
ENSG00000265996	4	0	0	0	7	13	1	1	0	0	0	0	0	0	1	0	MIR3671
ENSG00000199135	0	0	0	0	0	0	0	0	0	0	0	0	0	0	0	1	MIR101-1
ENSG00000231485	1	0	0	0	1	0	0	0	0	0	0	0	0	0	0	2	RP4-535B20.1
ENSG00000235804	0	0	0	0	0	0	0	0	0	0	0	0	0	0	0	0	RP4-535B20.2
ENSG00000234496	0	0	0	0	0	0	0	0	0	0	0	0	0	0	0	0	MRPS21P1
ENSG00000162433	4147	85	25	582	878	859	221	559	442	580	208	387	38	100	145	436	AK4
ENSG00000231622	1	0	0	0	1	1	0	1	0	0	1	0	0	0	0	1	RP4-700A9.1
ENSG00000116675	99	34	14	15	42	37	7	14	6	9	54	151	14	20	19	133	DNAJC6
ENSG00000229294	0	1	0	0	0	0	0	0	0	0	0	0	0	0	0	0	RP5-1044H5.1
ENSG00000234144	0	0	0	0	0	0	0	0	0	0	0	0	0	0	0	0	COX6CP13
ENSG00000222624	0	0	0	0	0	0	0	0	0	0	0	0	0	0	0	0	RNU2-15P
ENSG00000116678	219	35	12	15	63	83	8	17	14	20	61	161	24	10	40	158	LEPR
ENSG00000213625	841	23	3	80	123	126	29	64	53	100	166	505	34	35	69	183	LEPROT
ENSG00000237852	1	1	0	0	1	0	0	0	0	1	0	1	0	0	0	0	RP4-630A11.3
ENSG00000238931	0	0	0	0	0	0	0	0	0	0	0	0	0	0	0	0	snoU13
ENSG00000224570	1	0	0	0	1	0	0	0	0	0	0	0	0	0	2	6	RP11-430H12.2
ENSG00000239319	0	0	0	0	0	0	0	0	0	0	0	0	0	0	0	0	RN7SL854P
ENSG00000184588	1	14	21	120	24	56	25	56	3	1	11	25	2	29	24	148	PDE4B
ENSG00000227466	0	0	0	0	0	0	0	0	0	0	0	0	0	0	0	0	RP11-397C12.1
ENSG00000223152	0	0	0	0	0	0	0	0	0	0	0	0	0	0	0	0	RNU4-88P
ENSG00000118473	4	30	12	5	10	10	0	5	1	1	9	25	2	25	22	120	SGIP1
ENSG00000264720	1	0	0	1	0	0	0	0	0	0	0	0	0	0	0	1	MIR3117
ENSG00000248458	2	0	0	0	0	0	0	0	0	0	0	1	0	0	0	2	AL139147.1
ENSG00000221655	0	0	0	0	0	0	0	0	0	0	0	0	0	0	0	0	AL354978.1
ENSG00000152760	0	1	3	5	3	6	2	6	0	0	0	0	0	0	1	5	TCTEX1D1
ENSG00000172410	0	0	0	0	0	0	0	0	0	0	0	0	0	0	0	1	INSL5
ENSG00000152763	13	55	12	8	2	5	1	3	0	1	13	37	1	7	14	199	WDR78
ENSG00000231080	0	0	0	0	0	0	0	0	0	0	0	0	0	0	0	0	RP11-342H21.2
ENSG00000198160	461	212	37	205	331	404	95	218	27	43	124	269	50	51	116	425	MIER1
ENSG00000116704	372	36	9	39	48	68	12	44	63	98	108	198	23	16	50	191	SLC35D1
ENSG00000203963	0	0	0	0	0	0	0	0	0	0	0	0	0	0	0	2	C1orf141
ENSG00000252433	0	0	0	0	0	0	0	0	0	0	0	0	0	0	0	0	SNORA31
ENSG00000162594	0	0	0	0	2	0	0	0	0	1	0	1	0	0	0	0	IL23R
ENSG00000253074	0	0	0	0	0	0	0	0	0	0	0	0	0	0	0	0	RNU6-586P
ENSG00000221733	0	0	0	0	0	0	0	0	0	0	0	0	0	0	0	0	AL109843.1
ENSG00000252116	0	0	0	0	0	0	0	0	0	0	0	0	0	0	0	0	RNU4ATAC4P
ENSG00000228523	0	0	0	0	0	0	0	0	0	0	0	2	0	0	0	1	RP4-763G1.1
ENSG00000081985	0	4	0	8	8	19	8	9	0	0	1	3	2	2	2	29	IL12RB2
ENSG00000142864	882	522	220	2202	3591	4479	952	2248	62	76	494	1354	206	350	682	2149	SERBP1
ENSG00000223263	1	2	0	3	5	2	0	4	0	0	0	2	0	1	0	0	RNU6-387P
ENSG00000235200	0	0	0	0	0	0	0	0	0	0	0	0	0	0	0	1	RP4-763G1.2
ENSG00000207504	0	0	0	0	0	0	0	0	0	0	0	0	0	0	0	0	RNU6-1031P
ENSG00000238139	0	0	0	0	0	0	0	0	0	0	0	0	0	0	0	0	RP11-393N21.1
ENSG00000242482	0	0	0	0	0	0	0	0	0	0	0	0	0	0	0	0	RN7SL392P
ENSG00000232048	0	0	0	0	0	0	0	0	0	0	0	0	0	0	0	0	HNRNPCP9
ENSG00000116717	111	44	8	23	27	33	9	24	9	10	46	93	11	14	17	102	GADD45A
ENSG00000172380	1041	48	41	179	290	312	55	213	79	99	245	688	51	81	167	292	GNG12
ENSG00000238778	0	0	0	0	0	0	0	0	0	0	0	0	1	0	0	0	RNU7-80P
ENSG00000232284	11	3	4	2	1	0	1	2	0	0	8	11	0	2	5	56	GNG12-AS1
ENSG00000235055	0	0	0	0	1	0	0	0	0	0	0	0	0	0	0	0	RP4-609E1.2
ENSG00000162595	5	1	1	0	0	1	0	0	0	0	4	12	3	0	8	16	DIRAS3
ENSG00000228431	0	0	0	0	0	0	0	0	0	0	0	0	0	1	0	0	ARL5AP3
ENSG00000263542	0	0	0	0	0	0	0	0	0	0	0	0	0	0	0	0	AL157407.1
ENSG00000116729	464	281	100	5	18	16	5	5	15	13	118	414	37	110	303	1352	WLS
ENSG00000234383	2	9	1	0	0	1	0	0	0	0	0	7	1	1	3	20	CTBP2P8
ENSG00000221203	1	0	0	0	0	0	0	0	0	0	0	1	0	1	1	4	MIR1262
ENSG00000229133	0	0	0	0	1	1	0	0	0	0	0	0	0	0	0	1	RPS7P4
ENSG00000225242	0	0	0	0	0	0	0	0	0	0	0	0	0	0	0	0	COX6B1P7
ENSG00000237622	0	0	0	0	0	0	0	0	0	0	0	0	0	0	0	0	TCEB1P18
ENSG00000229440	0	0	0	0	0	0	0	0	0	0	0	0	0	0	0	0	RP5-1033K19.2
ENSG00000116745	0	0	0	0	0	0	0	0	0	0	0	1	0	1	0	2	RPE65
ENSG00000024526	25	83	31	289	562	649	123	283	1	3	44	103	46	42	107	296	DEPDC1
ENSG00000233589	1	5	0	1	5	10	1	1	0	0	0	0	1	1	1	7	RP4-694A7.2
ENSG00000234264	0	0	1	3	3	0	0	1	0	0	0	1	1	1	2	1	RP4-694A7.4
ENSG00000225167	0	0	0	0	0	0	0	0	0	0	0	0	0	0	0	0	TXNP2
ENSG00000223883	0	0	0	0	0	0	0	0	0	0	0	0	0	0	0	0	RP11-424D14.1
ENSG00000235446	0	0	0	0	0	0	0	0	0	0	0	0	0	0	0	0	RP11-74K19.1
ENSG00000229639	0	0	0	0	0	0	0	0	0	0	0	0	0	0	0	1	RP3-380B4.1
ENSG00000033122	13	27	4	1	14	16	2	3	0	0	2	17	1	8	10	122	LRRC7
ENSG00000270615	0	0	0	0	1	0	0	0	0	0	0	0	0	0	0	2	RP11-379C1.1
ENSG00000240692	0	0	0	0	0	0	0	0	0	0	0	0	0	0	0	0	RN7SL538P
ENSG00000229359	0	0	0	0	0	0	0	0	0	0	0	0	0	0	0	0	PIN1P1
ENSG00000237919	0	1	0	0	0	0	0	0	0	0	0	0	0	0	0	2	RP11-181B18.1
ENSG00000066557	183	90	40	191	384	464	121	227	14	23	87	199	19	61	105	388	LRRC40
ENSG00000244389	0	0	0	0	0	1	0	0	0	0	0	0	1	0	0	0	RN7SL242P
ENSG00000116754	939	551	115	539	888	998	251	571	43	68	388	672	119	173	360	1601	SRSF11
ENSG00000228988	1	2	2	0	3	2	0	0	0	0	2	2	0	1	1	2	RP4-677H15.4
ENSG00000118454	148	106	32	136	272	290	61	175	14	14	79	193	21	47	66	426	ANKRD13C
ENSG00000197568	8	4	0	7	13	14	3	11	0	1	4	12	2	4	7	26	HHLA3
ENSG00000226088	1	0	0	1	2	1	1	0	1	0	1	1	0	1	0	2	RP11-180O5.2
ENSG00000116761	40	42	19	45	169	147	27	72	4	8	31	32	11	6	8	116	CTH
ENSG00000271992	0	3	1	1	7	3	0	4	0	0	3	1	1	0	0	9	RP11-42O15.3
ENSG00000233020	0	0	0	0	0	1	0	0	0	0	0	0	0	0	0	0	RP11-42O15.2
ENSG00000237033	0	0	0	0	0	0	0	0	0	0	0	0	0	0	0	0	CASP3P1
ENSG00000229051	0	1	0	0	0	0	0	1	0	0	0	0	0	0	0	0	RP5-952N6.1
ENSG00000226208	0	0	0	0	0	0	0	0	0	0	0	0	0	0	0	0	RP11-99H8.1
ENSG00000050628	66	2	0	9	9	22	2	7	25	8	52	247	8	2	2	19	PTGER3
ENSG00000235782	0	0	0	0	0	0	0	0	0	0	0	1	0	0	0	0	RP3-333A15.1
ENSG00000269933	1	0	0	0	0	0	0	0	0	0	0	3	0	0	0	0	RP3-333A15.2
ENSG00000235079	2	2	1	0	3	3	0	2	0	0	1	4	0	1	3	1	ZRANB2-AS1
ENSG00000132485	322	177	65	312	537	645	123	301	31	37	251	476	56	111	242	697	ZRANB2
ENSG00000207721	2	1	1	0	8	13	0	3	2	0	2	3	0	0	2	4	MIR186
ENSG00000229956	0	2	0	0	0	6	0	1	0	0	0	7	0	2	3	4	ZRANB2-AS2
ENSG00000264239	0	0	0	0	0	0	0	0	0	0	0	0	0	0	0	0	AL360297.1
ENSG00000237726	0	0	0	0	0	0	0	0	0	0	0	1	0	0	0	1	RP11-386O9.2
ENSG00000226324	0	1	0	0	0	0	0	0	0	0	0	0	0	0	0	0	RP11-115M14.1
ENSG00000172260	0	11	13	12	24	23	8	10	2	1	4	6	0	16	11	83	NEGR1
ENSG00000231985	0	0	0	0	0	0	0	0	0	0	0	0	0	0	0	1	RP11-82L20.1
ENSG00000271618	0	0	0	0	0	0	0	0	0	0	0	0	0	0	0	0	RP11-175G14.2
ENSG00000228853	0	0	0	0	1	0	0	0	0	0	0	0	0	0	0	2	NEGR1-IT1
ENSG00000233994	1	1	0	1	2	5	1	1	0	0	0	4	1	0	1	3	GDI2P2
ENSG00000227207	0	0	0	0	0	1	0	0	0	0	0	0	0	0	0	0	RPL31P12
ENSG00000212366	0	0	0	0	0	1	0	0	0	0	0	0	0	0	0	0	RNU6-1246P
ENSG00000225087	0	0	0	0	2	2	2	1	0	0	0	0	0	0	0	0	RP4-660H19.1
ENSG00000227016	0	0	0	0	0	1	0	0	0	0	0	0	0	0	0	0	RP11-262K1.1
ENSG00000229636	0	0	0	0	0	0	0	0	0	0	0	0	0	0	0	0	KRT8P21
ENSG00000251825	0	0	0	0	0	0	0	0	0	0	0	0	0	0	0	0	RN7SKP19
ENSG00000233973	0	1	0	0	0	0	0	0	0	0	0	0	0	0	0	0	RP4-598G3.1
ENSG00000223479	0	0	0	0	0	0	0	0	0	0	0	0	0	0	0	0	RP4-788P17.1
ENSG00000200601	0	0	1	0	0	0	0	0	0	0	0	0	0	0	0	0	RNA5SP50
ENSG00000252005	0	0	0	0	0	0	0	0	0	0	0	0	0	0	0	0	RNU4ATAC8P
ENSG00000162620	2	0	0	2	3	17	2	4	0	1	1	0	0	1	6	5	LRRIQ3
ENSG00000254685	60	7	4	19	40	51	11	17	6	13	21	59	2	14	19	44	FPGT
ENSG00000259030	5	3	1	0	0	0	0	0	0	0	8	10	1	1	5	22	FPGT-TNNI3K
ENSG00000116783	0	1	1	0	0	0	0	0	0	0	0	1	0	0	0	4	TNNI3K
ENSG00000237324	0	0	0	0	0	0	0	0	0	0	0	0	0	0	1	0	RP11-439H8.4
ENSG00000233894	0	0	0	0	1	1	0	0	0	0	0	0	0	0	0	2	RP4-650F12.2
ENSG00000162621	0	0	0	0	0	0	0	0	0	0	0	0	0	1	0	4	LRRC53
ENSG00000178965	0	2	1	0	0	0	1	0	0	0	0	0	0	0	0	0	C1orf173
ENSG00000234497	0	0	0	0	0	0	0	0	0	0	0	0	0	0	0	0	RP4-612J11.1
ENSG00000272864	0	0	0	0	0	0	0	0	0	0	0	0	0	0	0	0	RP11-17E13.2
ENSG00000116791	261	16	9	47	110	229	41	42	31	58	73	134	21	17	19	101	CRYZ
ENSG00000162623	48	10	6	103	197	329	85	83	9	5	22	40	9	7	29	65	TYW3
ENSG00000229943	0	0	0	0	0	0	0	0	0	0	0	0	0	0	0	0	RP11-93N20.1
ENSG00000261213	0	0	0	0	0	0	0	0	0	0	0	0	0	0	0	0	RP11-510C10.4
ENSG00000224127	0	0	0	0	0	0	0	0	0	0	0	0	0	0	0	0	RP11-510C10.2
ENSG00000162624	1	0	1	2	3	4	0	1	0	1	0	0	0	0	0	3	LHX8
ENSG00000224149	0	0	0	0	0	0	0	0	0	1	0	0	0	0	0	0	RP11-510C10.3
ENSG00000206999	0	0	0	0	0	0	0	0	0	0	0	0	0	0	0	0	RNU6-622P
ENSG00000137968	72	47	14	10	30	24	1	5	3	1	15	35	4	23	43	247	SLC44A5
ENSG00000224493	1	0	1	0	0	0	0	0	0	0	0	0	0	0	0	4	RP11-87O11.1
ENSG00000252338	0	0	0	0	0	0	0	0	0	0	0	0	0	0	0	3	RNU6-503P
ENSG00000213579	0	2	0	0	0	0	1	0	0	0	0	0	0	0	1	2	RP4-595K12.1
ENSG00000230863	13	0	0	4	1	1	1	1	3	1	0	4	0	2	0	15	RP4-595K12.2
ENSG00000178193	0	1	0	0	0	1	0	0	0	0	0	2	0	0	0	1	RP4-682C21.5
ENSG00000117054	268	59	25	141	197	313	65	168	29	42	87	262	28	48	102	258	ACADM
ENSG00000181227	4	1	0	2	3	10	2	2	1	1	3	3	1	1	5	5	RP4-682C21.2
ENSG00000137955	494	286	53	336	996	979	193	516	30	41	138	338	54	56	85	563	RABGGTB
ENSG00000206620	0	0	0	0	0	0	0	0	0	0	0	0	0	0	0	0	SNORD45C
ENSG00000207241	0	0	0	0	0	0	0	0	0	0	0	0	0	0	0	0	SNORD45A
ENSG00000201487	0	0	0	0	0	0	0	0	0	0	0	0	0	0	0	0	SNORD45B
ENSG00000057468	3	3	0	1	11	5	0	0	1	0	0	3	0	1	2	2	MSH4
ENSG00000266832	0	0	0	0	0	0	0	0	0	0	0	0	0	0	0	0	AL445464.1
ENSG00000154007	0	0	0	0	0	0	0	0	0	0	0	0	0	0	0	0	ASB17
ENSG00000225605	0	0	0	0	0	0	0	0	0	0	0	0	0	0	0	0	RP11-550H2.1
ENSG00000230027	0	0	0	0	0	1	0	0	0	0	0	0	0	0	0	0	RP11-550H2.2
ENSG00000184005	6	6	12	88	186	195	38	102	1	1	15	71	11	36	123	160	ST6GALNAC3
ENSG00000223905	0	0	0	0	0	0	0	0	0	0	0	0	0	0	0	0	RP11-335E14.1
ENSG00000272855	0	1	0	0	1	0	1	2	0	0	0	0	0	0	0	1	RP5-1102E8.3
ENSG00000226415	20	7	2	16	24	9	10	11	3	4	2	16	4	4	17	16	TPI1P1
ENSG00000264686	0	0	0	0	0	0	0	0	0	0	0	0	0	0	0	0	AC104458.1
ENSG00000199921	0	0	0	0	0	0	0	0	0	0	0	0	0	0	0	0	RNU6-161P
ENSG00000237552	0	0	0	0	0	0	0	0	0	0	0	0	0	0	0	0	RP11-415A20.1
[truncated: 55,374 more rows]
